# Supplementary material for: Risk factor for intestinal carriage of carbapenem-resistant Acinetobacter baumannii and the impact on subsequent infection among patients in an intensive care unit: an observational study
Source: PubMed Central journal article supplement — BMJ Open. 2020 Sep 9;10(9):e035893. doi: 10.1136/bmjopen-2019-035893 (PMC7482480; doi:10.1136/bmjopen-2019-035893), 2020-09-09
Supplement: bmjopen-2019-035893.draft_revisions.pdf [file bmjopen-2019-035893.draft_revisions.pdf]

# BMJ Open

BMJ Open is committed to open peer review. As part of this commitment we make the peer review history of every article we publish publicly available.

When an article is published we post the peer reviewers' comments and the authors' responses online. We also post the versions of the paper that were used during peer review. These are the versions that the peer review comments apply to.

The versions of the paper that follow are the versions that were submitted during the peer review process. They are not the versions of record or the final published versions. They should not be cited or distributed as the published version of this manuscript.

BMJ Open is an open access journal and the full, final, typeset and author-corrected version of record of the manuscript is available on our site with no access controls, subscription charges or pay-per-view fees (<http://bmjopen.bmj.com>).

If you have any questions on BMJ Open's open peer review process please email [info.bmjopen@bmj.com](mailto:info.bmjopen@bmj.com)

# BMJ Open

## Intestinal carriage of carbapenem-resistant *Acinetobacter baumannii* among patients in the intensive care unit: risk factors and the impact on subsequent infection

|                               |                                                                                                                                                                                                                                                                                                                                                                                                                                                                                                                                                                                                                                                                                                                                                                                                                                                 |
|-------------------------------|-------------------------------------------------------------------------------------------------------------------------------------------------------------------------------------------------------------------------------------------------------------------------------------------------------------------------------------------------------------------------------------------------------------------------------------------------------------------------------------------------------------------------------------------------------------------------------------------------------------------------------------------------------------------------------------------------------------------------------------------------------------------------------------------------------------------------------------------------|
| Journal:                      | <i>BMJ Open</i>                                                                                                                                                                                                                                                                                                                                                                                                                                                                                                                                                                                                                                                                                                                                                                                                                                 |
| Manuscript ID                 | bmjopen-2019-035893                                                                                                                                                                                                                                                                                                                                                                                                                                                                                                                                                                                                                                                                                                                                                                                                                             |
| Article Type:                 | Original research                                                                                                                                                                                                                                                                                                                                                                                                                                                                                                                                                                                                                                                                                                                                                                                                                               |
| Date Submitted by the Author: | 20-Nov-2019                                                                                                                                                                                                                                                                                                                                                                                                                                                                                                                                                                                                                                                                                                                                                                                                                                     |
| Complete List of Authors:     | <p>Qiao, Fu; Sichuan University West China Hospital, Department of Infection Control</p> <p>Huang, Wenzhi; Sichuan University West China Hospital, Department of Infection Control</p> <p>Gao, Shan; Zhengzhou University First Affiliated Hospital, Department of Infection Control</p> <p>Cai, Lin; Sichuan University West China Hospital, Intensive Care Unit</p> <p>Zhu, Shichao; Sichuan University West China Hospital, Department of Infection Control</p> <p>Wei, Li; Sichuan University West China Hospital, Department of Infection Control</p> <p>Kang, Yan</p> <p>Tao, Chuanmin; Sichuan University West China Hospital, Department of Laboratory Medicine</p> <p>Zong, Zhiyong; Sichuan University West China Hospital, Department of Infection Control; Sichuan University West China Hospital, Center of Infectious Disease</p> |
| Keywords:                     | EPIDEMIOLOGY, Adult intensive & critical care < INTENSIVE & CRITICAL CARE, Infection control < INFECTIOUS DISEASES                                                                                                                                                                                                                                                                                                                                                                                                                                                                                                                                                                                                                                                                                                                              |
|                               |                                                                                                                                                                                                                                                                                                                                                                                                                                                                                                                                                                                                                                                                                                                                                                                                                                                 |

SCHOLARONE™  
Manuscripts

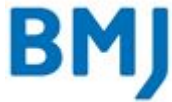

I, the Submitting Author has the right to grant and does grant on behalf of all authors of the Work (as defined in the below author licence), an exclusive licence and/or a non-exclusive licence for contributions from authors who are: i) UK Crown employees; ii) where BMJ has agreed a CC-BY licence shall apply, and/or iii) in accordance with the terms applicable for US Federal Government officers or employees acting as part of their official duties; on a worldwide, perpetual, irrevocable, royalty-free basis to BMJ Publishing Group Ltd ("BMJ") its licensees and where the relevant Journal is co-owned by BMJ to the co-owners of the Journal, to publish the Work in this journal and any other BMJ products and to exploit all rights, as set out in our [licence](#).

The Submitting Author accepts and understands that any supply made under these terms is made by BMJ to the Submitting Author unless you are acting as an employee on behalf of your employer or a postgraduate student of an affiliated institution which is paying any applicable article publishing charge ("APC") for Open Access articles. Where the Submitting Author wishes to make the Work available on an Open Access basis (and intends to pay the relevant APC), the terms of reuse of such Open Access shall be governed by a Creative Commons licence – details of these licences and which [Creative Commons](#) licence will apply to this Work are set out in our licence referred to above.

Other than as permitted in any relevant BMJ Author's Self Archiving Policies, I confirm this Work has not been accepted for publication elsewhere, is not being considered for publication elsewhere and does not duplicate material already published. I confirm all authors consent to publication of this Work and authorise the granting of this licence.

1  
2  
3  
4 1 **Intestinal carriage of carbapenem-resistant *Acinetobacter baumannii***  
5  
6  
7 2 **among patients in the intensive care unit: risk factors and the**  
8  
9 3 **impact on subsequent infection**  
10  
11

12 4 Fu Qiao<sup>1</sup>, Wenzhi Huang<sup>1</sup>, Shan Gao<sup>2</sup>, Lin Cai<sup>3</sup>, Shichao Zhu<sup>1</sup>, Li Wei<sup>1</sup>, Yan Kang<sup>3</sup>,  
13  
14  
15 5 Chuanmin Tao<sup>4\*</sup>, Zhiyong Zong<sup>1,5\*</sup>  
16

17 6 <sup>1</sup> Department of Infection Control, West China Hospital, Sichuan University, Chengdu, China.  
18

19 7 <sup>2</sup> Department of Infection Control, The First Affiliated Hospital of Zhengzhou University,  
20

21 8 Zhengzhou, China. <sup>3</sup> Intensive Care Unit, West China Hospital, Sichuan University, Chengdu,  
22

23 9 China. <sup>4</sup> Department of Laboratory Medicine, West China Hospital, Sichuan University,  
24

25 10 Chengdu, China. <sup>5</sup> Center of Infectious Disease, West China Hospital, Sichuan University,  
26

27 11 Chengdu, China  
28  
29  
30  
31  
32

33 13 **Running title: intestinal carriage of CRAB in ICU**  
34  
35  
36  
37

38 15 Keywords: carbapenem-resistant; *Acinetobacter baumannii*; intestinal carriage; intensive care unit.  
39

40 16 Word count: 3147  
41

42 17 **\*Co-corresponding author**  
43

44 18 Dr. Chuanmin Tao, Department of Laboratory Medicine, West China Hospital, Sichuan  
45

46 19 University, Chengdu, China. Email: [taocm@scu.edu.cn](mailto:taocm@scu.edu.cn)  
47

48 20 Dr. Zhiyong Zong, Center of Infectious Diseases, West China Hospital (Huaxi), Guoxuexiang 37,  
49

50 21 Chengdu 610041, China. Phone: 86-28-8542-2637. Fax: 86-28-8542-3212. E-mail:  
51

52 22 [zongzhiyong@gmail.com](mailto:zongzhiyong@gmail.com)  
53  
54  
55  
56  
57  
58  
59  
60

## 23 Abstract

24 **Objectives:** To assess the incidence and the impact of carbapenem-resistant *Acinetobacter*  
25 *baumannii* (CRAB) intestinal carriage on subsequent CRAB infection and to study risk factors of  
26 acquiring CRAB intestinal carriage among patients in intensive care unit (ICU).

27 **Design:** Observational study including a case control study and a retrospective cohort study.

28 **Setting:** A 50-bed general ICU of a university hospital, China.

29 **Methods:** From May 2017 to April 2018, an observational study was conducted in a 50-bed  
30 general ICU of a university hospital in China. Rectal swabs were collected from ICU patients on  
31 admission and thereafter weekly. Risk factors of acquiring CRAB intestinal carriage were analyzed  
32 using multiple logistic regression. Patients with CRAB intestinal carriage were then compared to  
33 those without for the incidence of subsequent CRAB infection using Kaplan–Meier survival and  
34 COX multivariate analyses.

35 **Results:** CRAB intestinal carriage was detected in 6.87% (66/961; 95% CI 5.27%–8.47%) of  
36 patients on ICU admission, whereas 11.97% (115/961; 95% CI 9.91%–14.02%) of patients  
37 acquired CRAB intestinal carriage during the ICU stay. Pancreatitis (OR 2.16, 95% CI 1.28–3.67),  
38 hematological disease (OR 2.26, 95% CI 1.42–3.58), gastric tube feeding (OR 3.35, 95% CI 2.03–  
39 5.51), and use of carbapenems (OR 1.84, 95% CI 1.11–3.07) were independent risk factors for  
40 acquiring CRAB intestinal carriage. The incidence of subsequent CRAB infection was 1.75-fold  
41 in patients with CRAB intestinal carriage compared to that in patients without (95% CI 1.16–2.62,  
42 P=0.007).

43 **Conclusion:** More patients acquired CRAB intestinal carriage during their ICU stay than had on  
44 admission. Severity of illness, acute pancreatitis, tube feeding, and use of carbapenems were  
45 independent risk factors of acquisition of CRAB intestinal carriage. Patients with CRAB intestinal

1  
2  
3 46 carriage are more likely to develop CRAB infection.  
4  
5  
6 47

7  
8 48 **Strengths and limitations of this study**  
9

10 49 A case control study was performed to analyze risk factors of the acquisition of CRAB intestinal  
11  
12 50 carriage in ICU.  
13

14 51 A retrospective cohort study was performed to address whether intestinal CRAB carriage could  
15  
16  
17 52 lead to an increased likelihood of subsequent CRAB infection.  
18

19 53 Most influencing factors were considered in the study.  
20

21 54 Not all screened CRABs were confirmed using Vitek II or other methods.  
22  
23  
24  
25  
26  
27  
28  
29  
30  
31  
32  
33  
34  
35  
36  
37  
38  
39  
40  
41  
42  
43  
44  
45  
46  
47  
48  
49  
50  
51  
52  
53  
54  
55  
56  
57  
58  
59  
60

## 56 Background

57 *Acinetobacter baumannii* is one of the most common nosocomial pathogens[1]. A  
58 systematic review has revealed that *A. baumannii* accounted for 11.28% of nosocomial infections  
59 in general hospitals in China, making it the third most common nosocomial pathogen[2].  
60 Carbapenems such as meropenem and imipenem are a class of potent antimicrobial agents for  
61 treating severe infections caused by Gram-negative bacteria including *A. baumannii*. However,  
62 carbapenem-resistant *A. baumannii* (CRAB) has emerged worldwide. As early as 2013, the US  
63 Centers for Disease Control and Prevention listed multi-drug resistant *A. baumannii* (MDRAB)  
64 including CRAB as a serious threat[3], and the World Health Organization listed CRAB as one of  
65 the three most critical threats in a global drug-resistant warning in 2017[4]. The prevalence of *A.*  
66 *baumannii* and its resistance to carbapenems varies from country to country. For instance, the  
67 European Bacterial Resistance Surveillance Report shows that the rate of *Acinetobacter* resistant  
68 to carbapenem in Europe in 2017 was 33.4% (95% CI 32%–35%), but it was as high as 96.2% in  
69 Croatia (95% CI 92%–98%) [5]. In the US, 49.5% of *A. baumannii* is resistant to carbapenems,  
70 while in Singapore, India, and Pakistan, it is 50%, 85%, and 62-100%, respectively[6,7]. The  
71 prevalence of CRAB is also very high in China. The surveillance data released by CHINET (China  
72 Antimicrobial Surveillance Network; <http://chinets.com/Chinet>), a national network in China,  
73 have shown that *A. baumannii* isolates ranked the 5th in the number of microbial isolates from all  
74 types of clinical samples in 2018, with 77.1% and 78.1% of *A. baumannii* isolates resistant to  
75 imipenem and meropenem, respectively[8].

76 Infections caused by CRAB can lead to serious consequences. A previous study has  
77 demonstrated that patients with CRAB infection had longer average length of stay (LOS) in ICUs  
78 (13.1 vs. 10.5 days) and \$11,359 higher average in-hospital costs than those with carbapenem-

1  
2  
3 79 susceptible *A. baumannii* (CSAB) infection[9]. Another previous study has found that the  
4  
5 80 mortality rate of patients with CRAB infection is 2.22-fold that of patients with CSAB  
6  
7 81 infection[10]. A case-control study conducted by our team have also showed that the 28-day  
8  
9 82 survival rate of patients with bloodstream CRAB infection was 66.17%, lower than the 96.95% of  
10  
11 83 those with bloodstream CSAB infection[11].  
12  
13

14  
15 84 It is well known that *A. baumannii* including CRAB usually colonized in the respiratory tract  
16  
17 85 of hospitalized patients, in particular those with mechanical ventilation[12,13]. The colonization  
18  
19 86 of CRAB in the respiratory tract has been found as a major risk factor for subsequent CRAB  
20  
21 87 infection[14]. However, ICU patients may carry CRAB in intestine on admission or acquire CRAB  
22  
23 88 during the ICU stay[15]. Patients with intestinal carriage of multi-drug resistant organisms  
24  
25 89 (MDRO), in particular carbapenem-resistant *Enterobacteriaceae* (CRE), may sever as a reservoir  
26  
27 90 for further dissemination in ICU[16] and could be associated with be associated with an increased  
28  
29 91 risk of subsequent MDRO infections[17]. Therefore, active screening the carriage of CRE, which  
30  
31 92 is usually performed using rectal swabs, has been recommended as a core component of the  
32  
33 93 infection control bundle[7]. However, by contrast to CRE, the prevalence of CRAB intestinal  
34  
35 94 carriage among ICU patients is much less studied and the risk factors of acquisition of CRAB  
36  
37 95 intestinal carriage remains largely unknown. In addition, it remains to be determined whether  
38  
39 96 CRAB intestinal carriage leads to increased risks of subsequent CRAB infection. To address these  
40  
41 97 questions, we therefore conducted this study.  
42  
43  
44  
45  
46  
47  
48

## 49 99 **Methods**

### 50 51 52 100 **Study settings**

53  
54 101 An observational study was conducted in a 50-bed general ICU of a 4,300-bed university  
55  
56



1  
2  
3 102 hospital in China. From May 2017 to April 2018, all patients admitted to the ICU were subjected  
4  
5 103 to collecting a rectal swab within 48 h of admission and thereafter weekly. For patients hospitalized  
6  
7  
8 104 for less than 3 days, a rectal swab was collected only once within 48 h of admission.  
9

10 105

### 11 12 106 **Inclusion and exclusion criteria**

13  
14  
15 107 Inclusion criteria: This study included all patients who were  $\geq 18$  years of age, admitted to  
16  
17 108 the ICU, and underwent collection of rectal swabs.

18  
19 109 Exclusion criteria: 1) patients who did not receive a rectal swab within 48 h of admission to  
20  
21 110 ICU; or 2) patients who were eligible for weekly follow-up collection of rectal swabs but did not  
22  
23  
24 111 receive subsequent sampling; or 3) patients with CRAB infection on admission.  
25

26 112

### 27 28 113 **Patient and public involvement**

29  
30  
31 114 Patients were involved in this study.  
32

33 115

### 34 35 116 **Definitions**

36  
37  
38 117 Patients with CRAB intestinal carriage were defined as those with CRAB isolated from a  
39  
40 118 rectal swab, while patient without CRAB intestinal carriage referred to those whose swabs were  
41  
42 119 all negative for CRAB during the ICU stay. Patients with CRAB isolated from a rectal swab  
43  
44 120 collected within 48 h of ICU admission were defined as those with CRAB intestinal carriage on  
45  
46  
47 121 ICU admission. The acquisition of CRAB intestinal carriage referred to a patient who had a CRAB-  
48  
49 122 negative rectal swab collected within 48 h of ICU admission but had CRAB from a swab collected  
50  
51 123 after 48 h. CRAB infection was defined as the growth of CRAB from clinical specimens in the  
52  
53  
54 124 presence of clinical manifestations of infection[18]. Subsequent CRAB infection referred to  
55  
56  
57  
58  
59  
60

1  
2  
3 125 CRAB infection developed after the collection of a CRAB-positive rectal swab for patients with  
4  
5 126 CRAB intestinal carriage and CRAB infection developed after 48 h admission to the ICU for  
6  
7  
8 127 patients without CRAB intestinal carriage.  
9

### 10 128 **Screening for CRAB by rectal swabs**

11  
12 129 For collecting rectal swabs, ready-to-use transport medium swabs (HBPT004; Hopebio  
13  
14 130 Biotechnology, Qingdao, China) was inserted about 2–3 cm into the patient's anus and then gently  
15  
16  
17 131 rotated. After sampling, the swab was inserted into the ready-to-use transport medium and  
18  
19 132 transported to the laboratory within 2 h. Rectal swabs were inoculated onto modified CHROMagar  
20  
21 133 *Acinetobacter* colorimetric plates (Chromagar; Paris, France) containing 2 mg/L meropenem using  
22  
23  
24 134 the partition-and-streaking method[19,20]. Plates were then cultured at 37°C for 18–24 h[20].  
25

26 135

### 28 136 **Data collection and statistical analysis**

29  
30  
31 137 In this study, the patient's demographic data, underlying diseases, invasive procedures,  
32  
33 138 medical orders, and use of antimicrobial agents were retrieved from the electronic medical record  
34  
35 139 system. Two professional statisticians collaborated to clean the data.  
36

37  
38 140 We performed two types of comparison. First, a case control study was performed to analyze  
39  
40 141 risk factors of the acquisition of CRAB intestinal carriage in ICU. Patients with ICU acquisition  
41  
42 142 of CRAB intestinal carriage were assigned to the case group, while those without CRAB intestinal  
43  
44 143 carriage during their ICU stay were assigned to the control group. All potential factors were  
45  
46  
47 144 initially subjected to the univariate analysis. Quantitative data were described by the median  
48  
49 145 (interquartile range) and were then analyzed using a rank-sum test. Qualitative data were described  
50  
51 146 by number of cases (composition ratio) and were then analyzed using the chi-square test or Fisher  
52  
53  
54 147 exact probability method when applied. All variables showing *P* value less than 0.2 in the  
55

1  
2  
3 148 univariate analysis were then included into the multiple logistic regression using the forward  
4  
5 149 selection stepwise regression method[21,22]. Odds ratio (OR) and 95% confidence interval (CI)  
6  
7  
8 150 were calculated. The Hosmer-Lemeshow method was used to test the goodness-of-fit of the  
9  
10 151 multiple logistic model[23].

11  
12 152 Second, a retrospective cohort study was performed to address whether intestinal CRAB  
13  
14 153 carriage could lead to an increased likelihood of subsequent CRAB infection. In this cohort study,  
15  
16 154 the exposed group comprised patients with CRAB intestinal carriage either detected on ICU  
17  
18 155 admission or acquired during the ICU stay, while the non-exposed group consisted of those without  
19  
20 156 CRAB intestinal carriage. As the impact of CRAB intestinal carriage on subsequent infection may  
21  
22 157 also be influenced by other factors such as patient demographics, underlying diseases,  
23  
24 158 antimicrobial use and medical operations, we included these factors for analysis instead of  
25  
26 159 evaluating CRAB carriage alone. Survival curves (probability of CRAB infection) in patients with  
27  
28 160 and without CRAB intestinal carriage were mapped using the Kaplan–Meier method[24,25]. After  
29  
30 161 introducing the interaction term of time and each variable ( $X \cdot \ln(T)$ ) into the COX model [24,25],  
31  
32 162 the proportional hazards hypothesis was tested, and the results showed no statistical significance  
33  
34 163 ( $P < 0.05$ ). Therefore, the COX regression (proportional hazards model) was used for univariate  
35  
36 164 and multivariate analyses. Hazard ratio (HR) and 95% CI were calculated to explore whether  
37  
38 165 CRAB intestinal carriage was a risk factor for subsequent CRAB infection. The Omnibus method  
39  
40 166 was used to test the goodness-of-fit of the multivariate COX model[26]. We also performed  
41  
42 167 subgroup analyses to investigate whether CRAB intestinal carriage on ICU admission and that  
43  
44 168 acquired in ICU had different impact on subsequent CRAB infection using the same statistical  
45  
46 169 method as describe above. For the subgroup analysis, patients with CRAB intestinal carriage on  
47  
48 170 ICU admission and those with ICU acquisition of CRAB intestinal carriage were assigned to two  
49  
50  
51  
52  
53  
54  
55  
56  
57  
58  
59  
60

171 exposed subgroups, respectively, while those without CRAB intestinal carriage were assigned to  
172 the non-exposed group.

173 All statistical analyses were performed using SPSS 21.0 (IBM–SPSS Inc; Armonk, NY, US)  
174 with a 0.05 two-sided test level.

175

## 176 **Results**

### 177 **Some patients (6.87%) had CRAB intestinal carriage on ICU admission and more (12.85%)** 178 **acquired in ICU**

179 From May 1, 2017 to April 30, 2018, a total of 1,605 patients were admitted to the ICU, of  
180 which 382 (23.8%) were not screened during their hospital stay. Of which the 382 patients, 323  
181 (84.55%) stayed in the ICU for no more than 2 days, while the other 59 (15.45%) patients were  
182 missed for sampling. In addition, 118 patients (118/1,605, 7.4%) were excluded due to  
183 inappropriate or incomplete sampling including 104 patients whose first rectal swab was collected  
184 48 h after admission and 14 patients who were not screened weekly. A total of 144 (144/1,605,  
185 8.97%) had CRAB infection on ICU admission and were therefore also excluded. Taken together,  
186 a total of 961 patients (620 males, 64.52% and 341 female 35.48%) were included in the analysis,  
187 with an average age of 54 (44–68) years (Figure 1).

188 Among the 961 patients, 66 (6.87%, 95% CI 5.27%–8.47%) had CRAB intestinal carriage on  
189 ICU admission. For the remaining 895 patients, 115 acquired (12.85%, 95% CI 10.66%–15.04%)  
190 CRAB intestinal carriage during their ICU stay with an average age of 51 (40–70) and a 1.61  
191 male/female ratio (71 male and 44 female).

192

### 193 **Multiple risks factors of acquiring CRAB intestinal carriage were identified**

1  
2  
3 194 The univariate analysis showed that APACHE II score (the patient's disease severity),  
4  
5 195 respiratory failure, renal dysfunction, hematological disease, acute pancreatitis, indwelling central  
6  
7  
8 196 venous catheter, gastric tube feeding, nebulization, and use of vancomycin, aminoglycosides,  
9  
10 197 carbapenems, tigecycline, and antifungal agents are risk factors for the acquisition of CRAB  
11  
12 198 intestinal carriage in the ICU. Multiple logistic regression including all variables with  $P < 0.2$  in  
13  
14  
15 199 the univariate analysis showed that APACHE II score, pancreatitis, hematological diseases, gastric  
16  
17 200 tube feeding, and use of carbapenems were independent risk factors for acquiring CRAB intestinal  
18  
19 201 carriage during the ICU stay (Table 1). For APACHE II score, the model estimated that the  
20  
21 202 increase of the score by 1 point would lead to a 4% increase of the risk of acquiring CRAB  
22  
23  
24 203 intestinal carriage in the ICU. Hosmer-Lemeshow test generated a 0.73 P value ( $\chi^2=5.25$ ,  $df=8$ ),  
25  
26 204 suggesting adequate goodness-of-fit of the multiple logistic model.  
27  
28  
29  
30

### 31 206 **CRAB intestinal carriage led to increased risks of subsequent CRAB infection**

32  
33 207 During the study period, 112 of the 961 patients (11.65%, 95% CI 9.63%–13.68%) developed  
34  
35 208 CRAB infections during the ICU stay. As for the infection type, lower respiratory tract infections  
36  
37  
38 209 were the most common ( $n=82$ , 73.21%), followed by bloodstream infections ( $n=9$ , 8.04%),  
39  
40 210 surgical site infection ( $n=8$ , 7.14%), while 13 patients (11.61%) had infections at other sites.  
41  
42 211 CRAB intestinal carriage was a risk factor for subsequent CRAB infection (HR 2.69, 95% CI  
43  
44  
45 212 1.85–3.92;  $P < 0.001$ ; Figure 2). The 90-day cumulative probability of no CRAB infection in  
46  
47 213 patients with and without CRAB intestinal carriage was 68.0% (95% CI 60.3%–75.7%) and 24.6%  
48  
49 214 (95% CI 12.2%–37.0%), respectively ( $P < 0.001$ ). In the univariate analysis, CRAB intestinal  
50  
51 215 carriage, APACHE II score, respiratory failure, hepatic insufficiency, hematological disease,  
52  
53  
54 216 pancreatitis, mechanical ventilation, placement of a central venous catheter, gastric tube feeding,  
55  
56  
57  
58  
59  
60

1  
2  
3 217 and the use of carbapenems were identified as risk factors for subsequent CRAB infection. In the  
4  
5 218 COX multivariate analysis, CRAB intestinal carriage was also found to be an independent risk  
6  
7  
8 219 factor for subsequent CRAB infection (HR 1.75, 95% CI 1.16–2.62; Table 2). Omnibus test  
9  
10 220 showed a log likelihood difference of 79.82 and generated a less than 0.001 P value, suggesting  
11  
12 221 adequate goodness-of-fit of the COX model.

14  
15 222 To evaluate whether CRAB intestinal carriage on admission and that acquired during the ICU  
16  
17 223 stay has different impact on subsequent CRAB, we performed subgroup analyses. In the subgroup  
18  
19 224 COX multivariate analysis, both CRAB intestinal carriage on admission and that acquired during  
20  
21 225 the ICU stay were an independent risk factor for subsequent CRAB infection (HR 2.08, 95% CI  
22  
23 226 1.17–3.68 for carriage on admission, Table S1 in the Supplementary file; HR 1.81, 95% CI 1.14–  
24  
25 227 2.88 for acquired carriage, Table S2). Omnibus test showed log likelihood difference of 66.06 and  
26  
27 228 74.18, respectively, and generated a less than 0.001 P value in the subgroup analysis, suggesting  
28  
29 229 adequate goodness-of-fit of the COX model.

30  
31  
32  
33 230 In addition to CRAB intestinal carriage, the use of ventilator (HR 2.37, 95% CI 1.15–4.89),  
34  
35 231 liver dysfunction (HR 2.23, 95% CI 1.29–3.85), and the use of carbapenems (HR 2.75, 95% CI  
36  
37 232 1.74–4.35), were also identified as independent risk factors of subsequent CRAB infection, while  
38  
39 233 the use of cephalosporins (HR 0.44, 95% CI 0.27–0.73) and cephamycins (HR 0.49, 95% CI 0.28–  
40  
41 234 0.84) were protective factors (Table 2).

42  
43  
44  
45 235

## 46 47 236 **Discussion**

48  
49 237 In this study, we found that in a region with a high CRAB prevalence, 6.87% of patients  
50  
51 238 (83.3% of those patients were transferred from other hospitals and 25.8% of them were stayed in  
52  
53 239 emergency ICU before admitted to the ICU) admitted to the ICU had CRAB intestinal carriage on

1  
2  
3 240 ICU admission, while an additional 11.97% of patients acquired CRAB intestinal carriage during  
4  
5 241 the ICU stay. The overall CRAB intestinal carriage rate was therefore 18.84%. This rate was  
6  
7 242 similar with a study conduct in Thailand, in which 5.45% (15/275) of patients had intestinal  
8  
9 243 carriage on ICU admission and 13.59% (28/206) patients acquired CRAB during their ICU  
10  
11 244 stay[15] and with another study in Italy[27], in which 18.92%(74/391) of patients carried CRAB  
12  
13 245 during ICU stay. However, the rate was significantly higher than those in Turkey (7.22%,  
14  
15 246 55/762)[28], Brazil (13.23%, 43/325)[29], USA (13.46%, 49/364)[30], and South Korea (15.06%,  
16  
17 247 168/1,115)[14], although other sites such as respiratory secretions were also screened in these  
18  
19 248 studies. This difference may be related to the local CRAB prevalence.  
20  
21  
22  
23

24 249 Interestingly, we found that gastric tube feeding is a risk factor for both acquiring CRAB  
25  
26 250 intestinal carriage of CRAB in ICU, which is consistent with the findings of Kiddee et al[15], in  
27  
28 251 which tube feeding was also a high-risk factor for carriage of Gram-negative bacilli. This may  
29  
30 252 suggest an entry point of CRAB into human intestine. In this study, 73.0% (84/115) of patients  
31  
32 253 who acquired CRAB intestinal carriage using tube feeding. During the study, we performed a one-  
33  
34 254 day snapshot sampling of the feeding tubes (at the tube port), feeding contents and containers for  
35  
36 255 preparing feeding contents in the ICU and found the presence of CRAB in the tube feeding content  
37  
38 256 (24.0%, 6/25), at the tube port (33.3%, 3/9) and the tube feeding containers (7.1%, 1/14), indicating  
39  
40 257 contamination. This may be a key point for intervention in the ICU.  
41  
42  
43  
44

45 258 We also found that patients with CRAB intestinal carriage were more likely to develop  
46  
47 259 subsequent CRAB infection than those without carriage. The survival curve in this study showed  
48  
49 260 that the cumulative infection rates in 90 days in patients with and without CRAB intestinal carriage  
50  
51 261 were 75.4% and 32%, respectively, similar to those reported in other studies[30]. However, the  
52  
53 262 HR was 1.75, which is much lower than those in previous studies[15,30,31]. This may be due to  
54  
55  
56  
57  
58  
59  
60

1  
2  
3 263 the fact that healthcare associated infections in our ICU were mainly caused by lower respiratory  
4  
5 264 infections, which accounting for more than 70% of infections, while we only screened the  
6  
7  
8 265 colonization of the intestines. Interestingly, we found that the use of cephalosporins and  
9  
10 266 cephamycins led to lower risks of subsequent CRAB infection, while carbapenem use led to  
11  
12 267 increased risks. The association between CRAB and carbapenem use has been documented  
13  
14  
15 268 before[30,32]. CRAB is usually resistant to cephalosporins and cephamycins. The use of  
16  
17 269 cephalosporins and cephamycins may reflect the fact that patients did not receive carbapenems  
18  
19 270 and could therefore result in reduced selection pressure for CRAB.

21  
22 271 There are a few limitations in this study. First, this is a single center study and the findings  
23  
24 272 may not be generalized. Second, we used a modified CHROMagar *Acinetobacter* chromogenic  
25  
26 273 plate to screen CRAB from rectal swabs. Not all screened CRABs were confirmed using Vitek II  
27  
28 274 or other methods and there may be false negative results. Nonetheless, at the beginning of this  
29  
30  
31 275 study, we confirmed that the 58 CRAB strains grown on the chromogenic medium were indeed all  
32  
33 276 *A. baumannii* by MALDI-TOF-MS and were all non-susceptible to imipenem or meropenem as  
34  
35 277 determined using the agar dilution method recommended by the Clinical and Laboratory Standards  
36  
37  
38 278 Institute (CLSI)[20]. Third, we only collected the patients' rectal swabs for investigating CRAB  
39  
40 279 carriage. Studies have shown concurrent swab collection of skin, oropharyngeal, and airway  
41  
42 280 secretions in addition to rectal swabs, may improve sensitivity. However, the sample sizes in these  
43  
44  
45 281 studies were small with only 21 and 34 cases, respectively[12,33]. Nonetheless, for practical  
46  
47 282 reasons and the aim to study CRAB intestinal carriage, we only collected rectal swabs. Last, this  
48  
49 283 study failed to collect for the first rectal swab specimen within 48 h of ICU admission from 23.8%  
50  
51 284 of the patients. Nonetheless, 84.55% of these patients stayed in the ICU for less than 48 h.

52  
53  
54 285



1  
2  
3 286 In conclusion, some patients had CRAB intestinal carriage but more acquired during their ICU  
4  
5 287 stay. Severity of illness, acute pancreatitis, tube feeding, and use of carbapenems were independent  
6  
7 288 risk factors of the acquisition of CRAB intestinal carriage. Patients with CRAB intestinal carriage  
8  
9  
10 289 were more likely to have subsequent CRAB infection than those without.  
11

12 290

### 14 291 **Acknowledgments**

15  
16  
17 292 We would like acknowledge the physicians and allied health staff of the ICU and the Department  
18  
19 293 of Electronic Medical Record system of West China Hospital.  
20

21 294

### 23 295 **Author contributions**

24  
25  
26 296 Fu Qiao, Zhiyong Zong and Chuanmin Tao contributed to study conception and design. Shichao  
27  
28 297 Zhu and Yan Kang contributed to acquisition of data. Lin Cai collected rectal swabs and  
29  
30 298 transported to the laboratory. Fu Qiao, Wenzhi Huang and Shan Gao analyzed and interpreted data.  
31  
32  
33 299 Li Wei inoculated rectal swabs onto plates cultured for 18-24h. Fu Qiao, Zhiyong Zong and  
34  
35 300 Chuanmin Tao drafted the manuscript. All authors revised the manuscript for important intellectual  
36  
37 301 content. All authors read and approved the final manuscript.  
38

39 302

### 41 303 **Funding**

42  
43  
44 304 The work was supported by grants from the National Natural Science Foundation of China (project  
45  
46 305 no. 81772233, 81661130159 and 81861138055), West China Hospital of Sichuan University  
47  
48 306 (1.3.5 project for disciplines of excellence, project no. ZYYC08006) and the Newton Advanced  
49  
50  
51 307 Fellowship, Royal Society, UK (NA150363).  
52

53 308

1  
2  
3 **309 Competing interests**  
4

5 310 The authors declare that they have no competing interests.  
6  
7

8 311

9  
10 **312 Patient consent for publication**  
11

12 313 Not required.  
13  
14

15 314

16  
17 **315 Ethics approval**  
18

19 316 This project was approved by the Ethics Committee of West China Hospital of Sichuan University.  
20  
21

22 317

23  
24 **318 Availability of data and materials**  
25

26 319 The datasets during the current study available from the corresponding author on reasonable  
27

28 320 request.  
29  
30

31 321

32  
33 **322 References**  
34  
35

36 323 1 Wong D, Nielsen TB, Bonomo RA, *et al*. Clinical and Pathophysiological Overview of  
37 324 Acinetobacter Infections: a Century of Challenges. *Clin Microbiol Rev* 2017;**30**:409–47.  
38 325 doi:10.1128/CMR.00058-16

39 326 2 Wang J, Liu F, Tartari E, *et al*. The Prevalence of Healthcare-Associated Infections in  
40 327 Mainland China: A Systematic Review and Meta-analysis. *Infect Control Hosp Epidemiol*  
41 328 2018;**39**:701–9. doi:10.1017/ice.2018.60

42 329 3 CDC. The biggest antibiotic-resistant threats in the U.S. Centers for Disease Control and  
43 330 Prevention. 2019. [https://www.cdc.gov/drugresistance/biggest\\_threats.html](https://www.cdc.gov/drugresistance/biggest_threats.html) (accessed 7 Aug 2019).

44 331 4 Global Priority List of Antibiotic-resistant Bacteria to Guide Research, Discovery, and  
45 332 Development of New Antibiotics. <http://apps.who.int/medicinedocs/en/m/abstract/Js23171en/>  
46 333 (accessed 7 Aug 2019).

47 334 5 European Centre for Disease Prevention and Control. Surveillance of antimicrobial resistance  
48 335 in Europe – Annual report of the European Antimicrobial Resistance Surveillance Network  
49 336 (EARS-Net) 2017. Stockholm: ECDC: 2018.

50 337 6 Asif M, Alvi IA, Rehman SU. Insight into *Acinetobacter baumannii*: pathogenesis, global  
51 338 resistance, mechanisms of resistance, treatment options, and alternative modalities. *Infect Drug*  
52 339 *Resist* 2018;**11**:1249–60. doi:10.2147/IDR.S166750  
53  
54  
55

- 1  
2  
3 340 7 Guidelines for the prevention and control of carbapenem-resistant Enterobacteriaceae,  
4 341 Acinetobacter baumannii and Pseudomonas aeruginosa in health care facilities. WHO.  
5 342 2017.<http://www.who.int/infection-prevention/publications/guidelines-cre/en/> (accessed 7 Aug  
6 343 2019).
- 7 344 8 CHINET Data Cloud. <http://chinets.com/Chinet> (accessed 7 Aug 2019).
- 8 345 9 Lemos EV, de la Hoz FP, Alvis N, *et al.* Impact of carbapenem resistance on clinical and  
9 346 economic outcomes among patients with Acinetobacter baumannii infection in Colombia. *Clin*  
10 347 *Microbiol Infect* 2014;**20**:174–80. doi:10.1111/1469-0691.12251
- 11 348 10 Lemos EV, de la Hoz FP, Einarson TR, *et al.* Carbapenem resistance and mortality in patients  
12 349 with Acinetobacter baumannii infection: Systematic review and meta-analysis. *Clinical*  
13 350 *Microbiology and Infection* 2014;**20**:416–23. doi:10.1111/1469-0691.12363
- 14 351 11 Huang W, Qiao F, Wang Y, *et al.* Risk factors and prognosis of patients with bloodstream  
15 352 infection due to carbapenem-resistant Acinetobacter baumannii. *Chinese Journal of Infection*  
16 353 *Control* 2015;**14**:668–71.
- 17 354 12 Nutman A, Lerner A, Schwartz D, *et al.* Evaluation of carriage and environmental  
18 355 contamination by carbapenem-resistant Acinetobacter baumannii. *Clinical microbiology and*  
19 356 *infection : the official publication of the European Society of Clinical Microbiology and Infectious*  
20 357 *Diseases* 2016;**22**:949.e5-949.e7. doi:10.1016/j.cmi.2016.08.020
- 21 358 13 Cheng VCC, Chen JHK, So SYC, *et al.* Use of fluoroquinolones is the single most important  
22 359 risk factor for the high bacterial load in patients with nasal and gastrointestinal colonization by  
23 360 multidrug-resistant Acinetobacter baumannii. *European Journal of Clinical Microbiology &*  
24 361 *Infectious Diseases* 2015;**34**:2359–66. doi:10.1007/s10096-015-2489-4
- 25 362 14 An JH, Kim Y-H, Moon J-E, *et al.* Active surveillance for carbapenem-resistant Acinetobacter  
26 363 baumannii in a medical intensive care unit: Can it predict and reduce subsequent infections and  
27 364 the use of colistin? *Am J Infect Control* 2017;**45**:667–72. doi:10.1016/j.ajic.2017.01.016
- 28 365 15 Kiddee A, Assawatheptawee K, Na-udom A, *et al.* Risk Factors for Gastrointestinal  
29 366 Colonization and Acquisition of Carbapenem-Resistant Gram-Negative Bacteria among Patients  
30 367 in Intensive Care Units in Thailand. *Antimicrobial Agents and Chemotherapy* 2018;**62**.  
31 368 doi:10.1128/AAC.00341-18
- 32 369 16 Tischendorf J, de Avila RA, Safdar N. Risk of infection following colonization with  
33 370 carbapenem-resistant Enterobacteriaceae: A systematic review. *Am J Infect Control* 2016;**44**:539–  
34 371 43. doi:10.1016/j.ajic.2015.12.005
- 35 372 17 McConville TH, Sullivan SB, Gomez-Simmonds A, *et al.* Carbapenem-resistant  
36 373 Enterobacteriaceae colonization (CRE) and subsequent risk of infection and 90-day mortality in  
37 374 critically ill patients, an observational study. *PLoS ONE* 2017;**12**:e0186195.  
38 375 doi:10.1371/journal.pone.0186195
- 39 376 18 Liu JY, Wu YH, Cai M, *et al.* Point-prevalence survey of healthcare-associated infections in  
40 377 Beijing, China: a survey and analysis in 2014. *J Hosp Infect* 2016;**93**:271–9.  
41 378 doi:10.1016/j.jhin.2016.03.019
- 42 379 19 Song W, Lee J, Kim T-K, *et al.* Modified CHROMagar Acinetobacter medium for direct  
43 380 detection of multidrug-resistant Acinetobacter strains in nasal and rectal swab samples. *Ann Lab*  
44 381 *Med* 2013;**33**:193–5. doi:10.3343/alm.2013.33.3.193
- 45 382 20 Wei L, Qiao F, Lin J, *et al.* Modified CHROMagar Acinetobacter chromogenic culture  
46 383 combined with MALDI-TOF-MS for rapid screening of carbapenem-resistant Acinetobacter  
47 384 baumannii from human gut. *Chin J Nosocomiol* 2018;**28**:2893–7.
- 48 385 21 Hosmer DW, Lemeshow S. *Applied Logistic Regression, Second Edition*. 2nd edition. New

- 1  
2  
3 386 York, NY: John Wiley & Sons 2000.  
4 387 <https://onlinelibrary.wiley.com/doi/book/10.1002/0471722146>  
5 388 22 Esterly JS, Griffith M, Qi C, *et al.* Impact of carbapenem resistance and receipt of active  
6 389 antimicrobial therapy on clinical outcomes of *Acinetobacter baumannii* bloodstream infections.  
7 390 *Antimicrob Agents Chemother* 2011;**55**:4844–9. doi:10.1128/AAC.01728-10  
8 391 23 Hosmer DW, Lemeshow S. Goodness of fit tests for the multiple logistic regression model.  
9 392 *Communications in Statistics - Theory and Methods* 1980;**9**:1043–69.  
10 393 doi:10.1080/03610928008827941  
11 394 24 Lee Y-T, Wang Y-C, Kuo S-C, *et al.* Multicenter Study of Clinical Features of Breakthrough  
12 395 *Acinetobacter* Bacteremia during Carbapenem Therapy. *Antimicrob Agents Chemother* 2017;**61**.  
13 396 doi:10.1128/AAC.00931-17  
14 397 25 Therneau TM, Grambsch PM. *Modeling Survival Data: Extending the Cox Model*. 2000  
15 398 edition. Springer 2000.  
16 399 26 Lin DY, Wei LJ, Ying Z. Checking the Cox model with cumulative sums of martingale-based  
17 400 residuals. *Biometrika* 1993;**80**:557–72. doi:10.1093/biomet/80.3.557  
18 401 27 Mammina C, Bonura C, Vivoli AR, *et al.* Co-colonization with carbapenem-resistant  
19 402 *Klebsiella pneumoniae* and *Acinetobacter baumannii* in intensive care unit patients. *Scand J Infect*  
20 403 *Dis* 2013;**45**:629–34. doi:10.3109/00365548.2013.782614  
21 404 28 Karaaslan A, Soysal A, Altinkanat Gelmez G, *et al.* Molecular characterization and risk factors  
22 405 for carbapenem-resistant Gram-negative bacilli colonization in children: emergence of NDM-  
23 406 producing *Acinetobacter baumannii* in a newborn intensive care unit in Turkey. *Journal of*  
24 407 *Hospital Infection* 2016;**92**:67–72. doi:10.1016/j.jhin.2015.09.011  
25 408 29 DalBen MF, Basso M, Garcia CP, *et al.* Colonization pressure as a risk factor for colonization  
26 409 by multiresistant *Acinetobacter* spp and carbapenem-resistant *Pseudomonas aeruginosa* in an  
27 410 intensive care unit. *Clinics (Sao Paulo, Brazil)* 2013;**68**:1128–33. doi:10.6061/clinics/2013(08)11  
28 411 30 Latibeaudiere R, Rosa R, Laowansiri P, *et al.* Surveillance cultures growing carbapenem-  
29 412 Resistant *Acinetobacter baumannii* predict the development of clinical infections: a retrospective  
30 413 cohort study. *Clin Infect Dis* 2015;**60**:415–22. doi:10.1093/cid/ciu847  
31 414 31 Tseng W-P, Chen Y-C, Chen S-Y, *et al.* Risk for subsequent infection and mortality after  
32 415 hospitalization among patients with multidrug-resistant gram-negative bacteria colonization or  
33 416 infection. *Antimicrobial Resistance & Infection Control* 2018;**7**:93. doi:10.1186/s13756-018-  
34 417 0388-z  
35 418 32 Blanco N, Harris AD, Rock C, *et al.* Risk Factors and Outcomes Associated with Multidrug-  
36 419 Resistant *Acinetobacter baumannii* upon Intensive Care Unit Admission. *Antimicrobial Agents*  
37 420 *and Chemotherapy* 2017;**62**. doi:10.1128/AAC.01631-17  
38 421 33 Marchaim D, Navon-Venezia S, Schwartz D, *et al.* Surveillance cultures and duration of  
39 422 carriage of multidrug-resistant *Acinetobacter baumannii*. *J Clin Microbiol* 2007;**45**:1551–5.  
40 423 doi:10.1128/JCM.02424-06  
41  
42  
43  
44  
45  
46  
47  
48 424  
49  
50 425  
51  
52  
53  
54  
55  
56  
57  
58  
59  
60

1  
2  
3 **426 Figure legends**  
4

5  
6 **427 Figure 1.** Patient selection flow algorithm  
7

8 **428 Figure 2.** Survival curves of patients with and without CRAB intestinal carriage (cumulative  
9  
10 probability of no CRAB infection). The solid line represents patients with CRAB intestinal  
11  
12 carriage, while the dashed line represents those without.  
13  
14  
15  
16  
17  
18  
19  
20  
21  
22  
23  
24  
25  
26  
27  
28  
29  
30  
31  
32  
33  
34  
35  
36  
37  
38  
39  
40  
41  
42  
43  
44  
45  
46  
47  
48  
49  
50  
51  
52  
53  
54  
55  
56  
57  
58  
59  
60

Table 1 Risk factors for the acquisition of CRAB intestinal carriage during the ICU stay

| Characteristics             | Patients with acquiring CRAB intestinal carriage |              | Univariate analysis |       | Multivariate analysis |   |
|-----------------------------|--------------------------------------------------|--------------|---------------------|-------|-----------------------|---|
|                             | Yes (n=115)                                      | No (n=780)   | OR (95% CI)         | P     | OR (95% CI)           | P |
| <b>Demographics</b>         |                                                  |              |                     |       |                       |   |
| Sex, male                   | 71 (61.74%)                                      | 502 (64.36%) | 1.12 (0.75–1.68)    | 0.590 |                       |   |
| Ethnicity, Han Chinese      | 108 (93.91%)                                     | 712 (91.28%) | 1.47 (0.66–3.29)    | 0.338 |                       |   |
| Age (median)                | 51 (40–70)                                       | 56 (45–68)   | /                   | 0.207 |                       |   |
| <b>Underlying disease</b>   |                                                  |              |                     |       |                       |   |
| Myocardial infarction       | 1 (0.87%)                                        | 4 (0.51%)    | 1.7 (0.19–15.36)    | 0.500 |                       |   |
| Peripheral vascular disease | 11 (9.57%)                                       | 62 (7.95%)   | 1.22 (0.62–2.40)    | 0.550 |                       |   |
| Cerebrovascular disease     | 4 (3.48%)                                        | 36 (4.62%)   | 0.74 (0.26–2.13)    | 0.582 |                       |   |
| Dementia                    | 1 (0.87%)                                        | 0 (0%)       | /                   | 0.130 |                       |   |
| Connective tissue disease   | 1 (0.87%)                                        | 12 (1.54%)   | 0.56 (0.07–4.36)    | 0.887 |                       |   |
| Peptic Ulcer                | 5 (4.35%)                                        | 25 (3.21%)   | 1.37 (0.51–3.66)    | 0.720 |                       |   |
| Hemiplegia                  | 0 (0%)                                           | 1 (0.13%)    | /                   | 1.000 |                       |   |
| Hypertension                | 36 (31.30%)                                      | 180 (23.08%) | 1.52 (0.99–2.33)    | 0.054 |                       |   |
| Tuberculosis                | 1 (0.87%)                                        | 12 (1.54%)   | 0.56 (0.07–4.36)    | 0.887 |                       |   |
| COPD                        | 10 (8.70%)                                       | 54 (6.92%)   | 1.28 (0.63–2.59)    | 0.490 |                       |   |

|    |                              |                    |                     |                         |                  |                         |                  |
|----|------------------------------|--------------------|---------------------|-------------------------|------------------|-------------------------|------------------|
| 1  |                              |                    |                     |                         |                  |                         |                  |
| 2  |                              |                    |                     |                         |                  |                         |                  |
| 3  | Respiratory failure          | 40 (34.78%)        | 163 (20.90%)        | 2.02 (1.33–3.07)        | <b>0.001</b>     |                         |                  |
| 4  |                              |                    |                     |                         |                  |                         |                  |
| 5  | Kidney failure               | 11 (9.57%)         | 31 (3.97%)          | 2.56 (1.25–5.24)        | <b>0.010</b>     |                         |                  |
| 6  |                              |                    |                     |                         |                  |                         |                  |
| 7  | Heart failure                | 7 (6.09%)          | 19 (2.44%)          | 2.99 (1.28–7.01)        | 0.060            |                         |                  |
| 8  |                              |                    |                     |                         |                  |                         |                  |
| 9  | Diabetes                     | 21 (18.26%)        | 102 (13.08%)        | 1.48 (0.89–2.49)        | 0.132            |                         |                  |
| 10 |                              |                    |                     |                         |                  |                         |                  |
| 11 | Liver dysfunction            | 5 (4.35%)          | 37 (4.74%)          | 0.91 (0.35–2.37)        | 0.850            |                         |                  |
| 12 |                              |                    |                     |                         |                  |                         |                  |
| 13 | <b>Hematological disease</b> | <b>71 (61.74%)</b> | <b>268 (34.36%)</b> | <b>3.08 (2.06–4.62)</b> | <b>&lt;0.001</b> | <b>2.26 (1.42–3.58)</b> | <b>0.001</b>     |
| 14 |                              |                    |                     |                         |                  |                         |                  |
| 15 | <b>Pancreatitis</b>          | <b>35 (30.43%)</b> | <b>77 (9.87%)</b>   | <b>3.99 (2.52–6.34)</b> | <b>&lt;0.001</b> | <b>2.16 (1.28–3.67)</b> | <b>0.004</b>     |
| 16 |                              |                    |                     |                         |                  |                         |                  |
| 17 | Medical operation            |                    |                     |                         |                  |                         |                  |
| 18 |                              |                    |                     |                         |                  |                         |                  |
| 19 | <b>Surgery</b>               | <b>82 (71.30%)</b> | <b>645 (82.69%)</b> | <b>0.52 (0.33–0.81)</b> | <b>0.004</b>     | <b>0.40 (0.24–0.68)</b> | <b>0.001</b>     |
| 20 |                              |                    |                     |                         |                  |                         |                  |
| 21 | CVC                          | 78 (67.83%)        | 424 (54.36%)        | 1.77 (1.17–2.68)        | <b>0.010</b>     |                         |                  |
| 22 |                              |                    |                     |                         |                  |                         |                  |
| 23 | Ventilator                   | 101 (87.83%)       | 666 (85.38%)        | 1.23 (0.68–2.23)        | 0.490            |                         |                  |
| 24 |                              |                    |                     |                         |                  |                         |                  |
| 25 | Indwelling catheter          | 110 (95.65%)       | 742 (95.13%)        | 1.13 (0.43–2.92)        | 0.810            |                         |                  |
| 26 |                              |                    |                     |                         |                  |                         |                  |
| 27 | <b>Tube feeding</b>          | <b>84 (73.04%)</b> | <b>280 (35.90%)</b> | <b>4.84 (3.13–7.49)</b> | <b>&lt;0.001</b> | <b>3.35 (2.03–5.51)</b> | <b>&lt;0.001</b> |
| 28 |                              |                    |                     |                         |                  |                         |                  |
| 29 | Nebulizer fiberoptic         | 73 (63.48%)        | 368 (47.18%)        | 1.95 (1.30–2.92)        | <b>0.001</b>     |                         |                  |
| 30 |                              |                    |                     |                         |                  |                         |                  |
| 31 | Bronchoscope                 | 1 (0.87%)          | 21 (2.69%)          | 0.32 (0.04–2.38)        | 0.390            |                         |                  |
| 32 |                              |                    |                     |                         |                  |                         |                  |
| 33 | Antimicrobial use            |                    |                     |                         |                  |                         |                  |
| 34 |                              |                    |                     |                         |                  |                         |                  |
| 35 | <b>Cephalosporin</b>         | <b>35 (30.43%)</b> | <b>312 (40.00%)</b> | <b>0.66 (0.43–1.00)</b> | <b>0.049</b>     | <b>0.59 (0.37–0.95)</b> | <b>0.029</b>     |
| 36 |                              |                    |                     |                         |                  |                         |                  |
| 37 | Vancomycin                   | 13 (11.30%)        | 32 (4.10%)          | 2.98 (1.51–5.86)        | <b>0.001</b>     |                         |                  |
| 38 |                              |                    |                     |                         |                  |                         |                  |
| 39 | Aminoglycosides              | 12 (10.43%)        | 31 (3.97%)          | 2.81 (1.40–5.65)        | <b>0.002</b>     |                         |                  |
| 40 |                              |                    |                     |                         |                  |                         |                  |
| 41 | <b>Carbapenems</b>           | <b>82 (71.30%)</b> | <b>295 (37.82%)</b> | <b>4.09 (2.66–6.27)</b> | <b>&lt;0.001</b> | <b>1.84 (1.11–3.07)</b> | <b>0.018</b>     |
| 42 |                              |                    |                     |                         |                  |                         |                  |
| 43 |                              |                    |                     |                         |                  |                         |                  |
| 44 |                              |                    |                     |                         |                  |                         |                  |
| 45 |                              |                    |                     |                         |                  |                         |                  |
| 46 |                              |                    |                     |                         |                  |                         |                  |
| 47 |                              |                    |                     |                         |                  |                         |                  |

|                                       |                     |                   |                  |                  |                         |              |
|---------------------------------------|---------------------|-------------------|------------------|------------------|-------------------------|--------------|
| Fluoroquinolones                      | 26 (22.61%)         | 137 (17.56%)      | 1.37 (0.85–2.20) | 0.190            |                         |              |
| Antifungal agents                     | 49 (42.61%)         | 138 (17.69%)      | 3.45 (2.29–5.22) | <b>&lt;0.001</b> |                         |              |
| Cephamycins                           | 16 (13.91%)         | 253 (32.44%)      | 0.34 (0.19–0.58) | <b>&lt;0.001</b> |                         |              |
| Lincomycin                            | 3 (2.61%)           | 61 (7.82%)        | 0.32 (0.10–1.02) | <b>0.040</b>     |                         |              |
| Tigecycline                           | 19 (16.52%)         | 69 (8.85%)        | 2.04 (1.18–3.54) | <b>0.010</b>     |                         |              |
| <b>APACHE II</b>                      | <b>21.5 (17–26)</b> | <b>17 (12–22)</b> | /                | <b>&lt;0.001</b> | <b>1.04 (1.01–1.07)</b> | <b>0.013</b> |
| Charlson score                        | 2 (1–5)             | 3 (2–4)           | /                | 0.063            |                         |              |
| Sharing room with other patients with | 20 (17.39%)         | 153 (19.62%)      | 0.86 (0.52–1.44) | 0.573            |                         |              |
| CRAB intestinal carriage              |                     |                   |                  |                  |                         |              |

COPD, chronic obstructive pulmonary disease. CVC, central venous catheter.

Variables with  $P < 0.05$  in the multiple logistic analysis are highlighted in bold.



Table 2 Variables associated with developing subsequent CRAB infection during the ICU stay

| Item                            | Subsequent CRAB infection during the ICU stay |                     | Univariate analysis     |                  | Multivariate analysis   |              |
|---------------------------------|-----------------------------------------------|---------------------|-------------------------|------------------|-------------------------|--------------|
|                                 | Yes (n=112)                                   | No (n=849)          | HR (95% CI)             | P                | HR (95% CI)             | P            |
| <b>CRAB intestinal carriage</b> | <b>51 (45.54%)</b>                            | <b>130 (15.31%)</b> | <b>2.69 (1.85–3.92)</b> | <b>&lt;0.001</b> | <b>1.75 (1.16–2.62)</b> | <b>0.007</b> |
| Demographics                    |                                               |                     |                         |                  |                         |              |
| Sex, male                       | 72 (64.29%)                                   | 548 (64.55%)        | 1.01 (0.68–1.48)        | 0.979            |                         |              |
| Ethnicity, Han Chinese          | 106 (94.64%)                                  | 774 (91.38%)        | 1.68 (0.74–3.83)        | 0.215            |                         |              |
| Age (median)                    | 53 (42–67)                                    | 55 (44–68)          | 1.00 (0.99–1.01)        | 0.940            |                         |              |
| APACHE II                       | 21 (17–26)                                    | 17 (12–22)          | 1.06 (1.03–1.08)        | <b>&lt;0.001</b> |                         |              |
| Charlson score                  | 3 (1–5)                                       | 3 (1.5–4)           | 0.99 (0.90–1.09)        | 0.869            |                         |              |
| Underlying disease              |                                               |                     |                         |                  |                         |              |
| Myocardial infarction           | 0 (0%)                                        | 6 (0.71%)           | 0.05 (0–6037.12)        | 0.615            |                         |              |
| Peripheral vascular disease     | 13 (11.61%)                                   | 66 (7.77%)          | 1.27 (0.71–2.27)        | 0.418            |                         |              |
| Cerebrovascular disease         | 4 (3.57%)                                     | 36 (4.24%)          | 1.02 (0.37–2.77)        | 0.971            |                         |              |
| Dementia                        | 0 (0%)                                        | 1 (0.12%)           | 0.05 (0–5419.76)        | 0.609            |                         |              |
| Connective tissue disease       | 1 (0.89%)                                     | 12 (1.41%)          | 0.72 (0.10–5.12)        | 0.739            |                         |              |
| Peptic ulcer                    | 4 (3.57%)                                     | 27 (3.18%)          | 1.07 (0.39–2.91)        | 0.891            |                         |              |
| Hemiplegia                      | 1 (0.89%)                                     | 0 (0%)              | 5.24 (0.73–37.73)       | 0.100            |                         |              |
| Hypertension                    | 28 (25.00%)                                   | 199 (23.44%)        | 1.06 (0.69–1.63)        | 0.792            |                         |              |
| Tuberculosis                    | 2 (1.79%)                                     | 12 (1.41%)          | 1.12 (0.28–4.54)        | 0.874            |                         |              |
| COPD                            | 11 (9.82%)                                    | 55 (6.48%)          | 1.46 (0.79–2.73)        | 0.231            |                         |              |
| Respiratory failure             | 47 (41.96%)                                   | 170 (20.02%)        | 2.14 (1.47–3.12)        | <b>&lt;0.001</b> |                         |              |
| Kidney failure                  | 9 (8.04%)                                     | 42 (4.95%)          | 1.61 (0.81–3.18)        | 0.171            |                         |              |
| Heart failure                   | 4 (3.57%)                                     | 27 (3.18%)          | 1.28 (0.47–3.47)        | 0.631            |                         |              |
| Diabetes                        | 15 (13.39%)                                   | 118 (13.90%)        | 0.85 (0.50–1.47)        | 0.570            |                         |              |
| <b>Liver dysfunction</b>        | <b>17 (15.18%)</b>                            | <b>34 (4.00%)</b>   | <b>3.07 (1.83–5.15)</b> | <b>&lt;0.001</b> | <b>2.23 (1.29–3.85)</b> | <b>0.004</b> |
| Hematological disease           | 60 (53.57%)                                   | 314 (36.98%)        | 1.71 (1.18–2.49)        | <b>0.005</b>     |                         |              |
| Pancreatitis                    | 29 (25.89%)                                   | 107 (12.60%)        | 1.85 (1.21–2.83)        | <b>0.004</b>     |                         |              |
| Medical operation               |                                               |                     |                         |                  |                         |              |

1  
2  
3  
4  
5  
6  
7  
8  
9  
10  
11  
12  
13  
14  
15  
16  
17  
18  
19  
20  
21  
22  
23  
24  
25  
26  
27  
28  
29  
30  
31  
32  
33  
34  
35  
36  
37  
38  
39  
40  
41  
42  
43  
44  
45  
46  
47

|                      |                     |                     |                         |                  |                         |                  |
|----------------------|---------------------|---------------------|-------------------------|------------------|-------------------------|------------------|
| Surgery              | 83 (74.11%)         | 711 (83.75%)        | 0.76 (0.49–1.16)        | 0.199            |                         |                  |
| CVC                  | 83 (74.11%)         | 470 (55.36%)        | 2.03 (1.33–3.10)        | <b>0.001</b>     |                         |                  |
| <b>Ventilator</b>    | <b>103 (91.96%)</b> | <b>719 (84.69%)</b> | <b>2.15 (1.09–4.26)</b> | <b>0.027</b>     | <b>2.37 (1.15–4.89)</b> | <b>0.019</b>     |
| Indwelling catheter  | 109 (97.32%)        | 808 (95.17%)        | 1.91 (0.61–6.03)        | 0.269            |                         |                  |
| Tube feeding         | 80 (71.43%)         | 332 (39.10%)        | 2.40 (1.58–3.62)        | <b>&lt;0.001</b> |                         |                  |
| Nebulizer fiberoptic | 72 (64.29%)         | 413 (48.65%)        | 1.13 (0.76–1.67)        | 0.542            |                         |                  |
| Bronchoscope         | 5 (4.46%)           | 18 (2.12%)          | 1.31 (0.53–3.21)        | 0.561            |                         |                  |
| Antimicrobial use    |                     |                     |                         |                  |                         |                  |
| <b>Cephalosporin</b> | <b>20 (17.86%)</b>  | <b>236 (27.80%)</b> | <b>0.51 (0.31–0.82)</b> | <b>0.006</b>     | <b>0.44 (0.27–0.73)</b> | <b>0.001</b>     |
| Vancomycin           | 3 (2.68%)           | 35 (4.12%)          | 0.67 (0.21–2.12)        | 0.496            |                         |                  |
| Aminoglycosides      | 1 (0.89%)           | 23 (2.71%)          | 0.25 (0.04–1.82)        | 0.173            |                         |                  |
| <b>Carbapenems</b>   | <b>82 (73.21%)</b>  | <b>351 (41.34%)</b> | <b>3.05 (2.01–4.64)</b> | <b>&lt;0.001</b> | <b>2.75 (1.74–4.35)</b> | <b>&lt;0.001</b> |
| Fluoroquinolones     | 32 (28.57%)         | 154 (18.14%)        | 1.00 (0.66–1.52)        | 0.986            |                         |                  |
| Antifungal agents    | 23 (20.54%)         | 157 (18.49%)        | 1.02 (0.64–1.61)        | 0.944            |                         |                  |
| <b>Cephamycins</b>   | <b>16 (14.29%)</b>  | <b>196 (23.09%)</b> | <b>0.48 (0.28–0.81)</b> | <b>0.006</b>     | <b>0.49 (0.28–0.84)</b> | <b>0.010</b>     |
| Lincomycin           | 5 (4.46%)           | 35 (4.12%)          | 0.94 (0.38–2.31)        | 0.897            |                         |                  |
| Tigecycline          | 13 (11.61%)         | 65 (7.66%)          | 1.40 (0.78–2.49)        | 0.259            |                         |                  |

COPD, chronic obstructive pulmonary disease. CVC, central venous catheter.

Variables with P < 0.05 in the multivariate COX analysis are highlighted in bold.

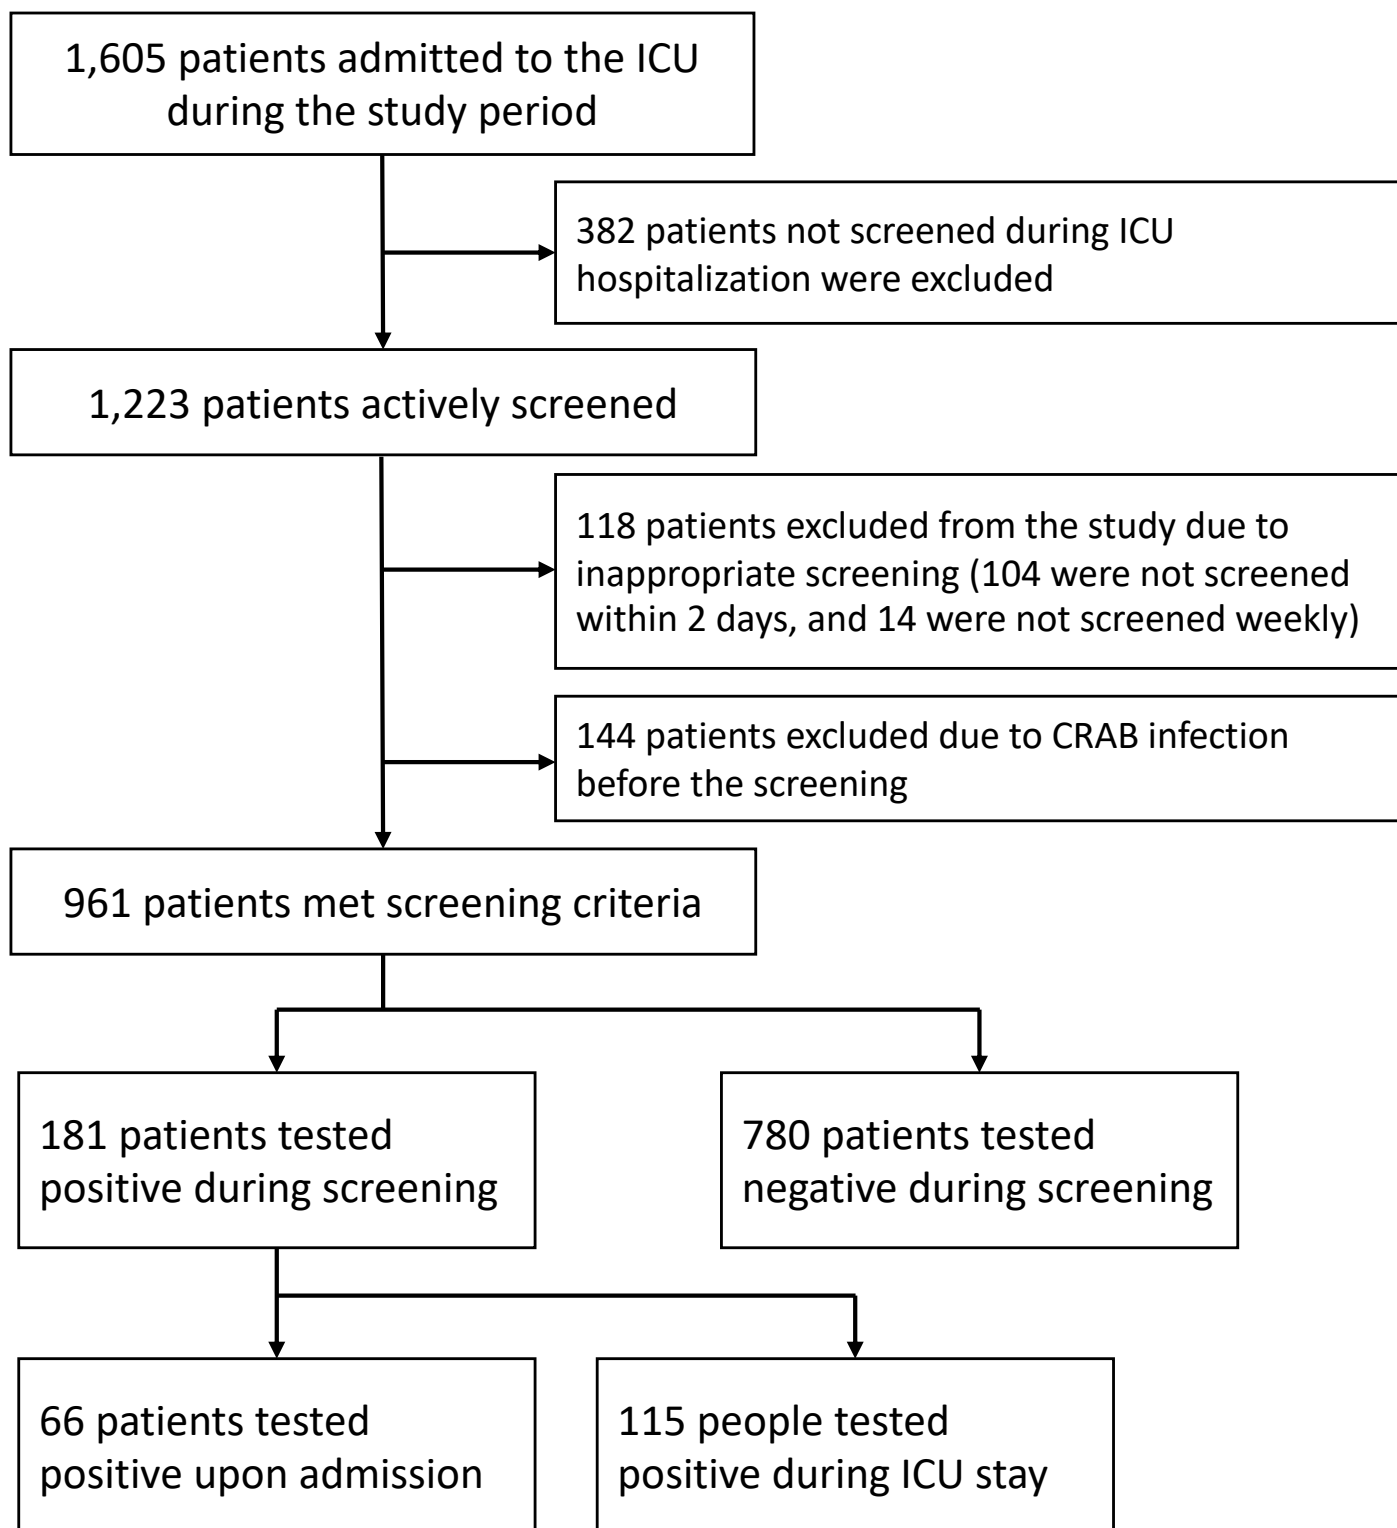

Figure 1. Patient selection flow algorithm

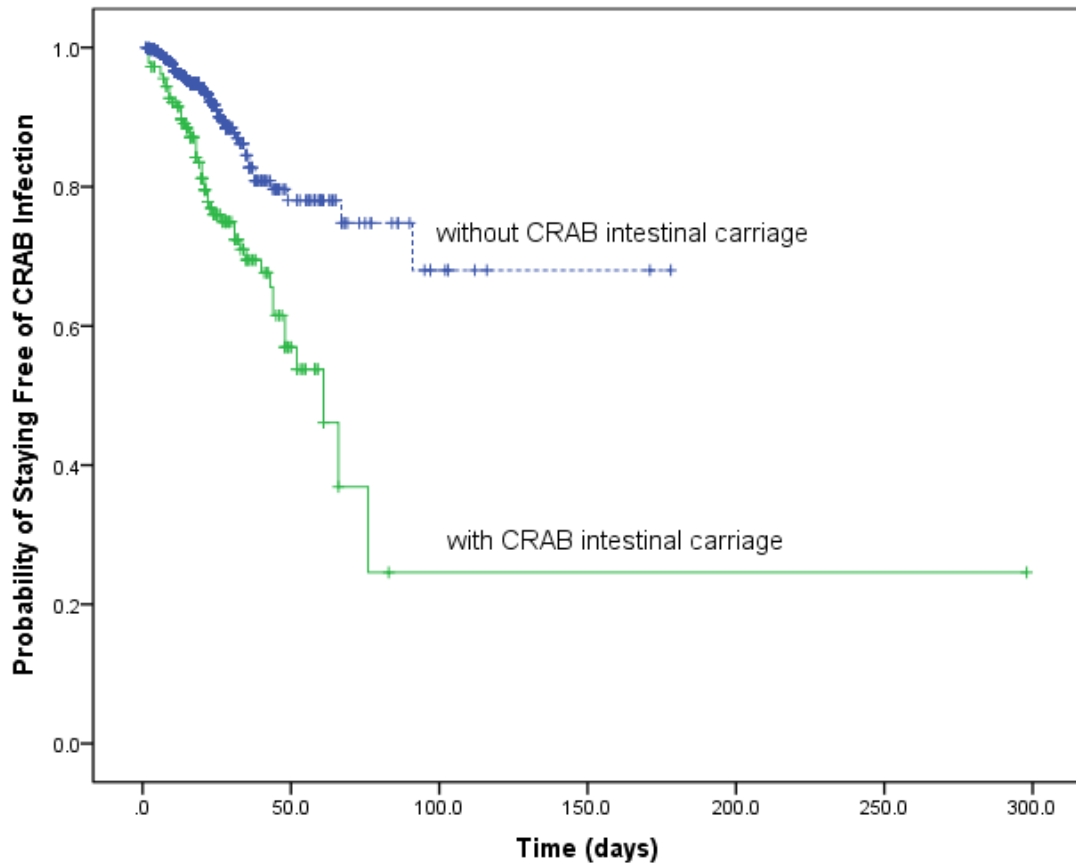

**Figure 2.** Survival curves of patients with and without CRAB intestinal carriage (cumulative probability of no CRAB infection). The solid line represents patients with CRAB intestinal carriage, while the dashed line represents those without.

## Supplementary files

Table S1 Variables associated with developing subsequent CRAB infection during the ICU stay (exposed group was those patients with intestinal carriage on ICU admission)

| Item                            | Subsequent CRAB infection during the ICU stay |                   | Univariate analysis     |                  | Multivariate analysis   |              |
|---------------------------------|-----------------------------------------------|-------------------|-------------------------|------------------|-------------------------|--------------|
|                                 | Yes (n=80)                                    | No (n=766)        | HR (95% CI)             | P                | HR (95% CI)             | P            |
| <b>CRAB intestinal carriage</b> | <b>19 (23.75%)</b>                            | <b>47 (6.14%)</b> | <b>2.98 (1.78-5.00)</b> | <b>&lt;0.001</b> | <b>2.08 (1.17-3.68)</b> | <b>0.012</b> |
| Demographics                    |                                               |                   |                         |                  |                         |              |
| Sex, male                       | 50 (62.50%)                                   | 499 (65.14%)      | 1.09 (0.70-1.72)        | 0.696            |                         |              |
| Ethnicity, Han Chinese          | 77 (96.25%)                                   | 697 (90.99%)      | 2.66 (0.84-8.45)        | 0.096            |                         |              |
| Age (median)                    | 54 (42-68)                                    | 55 (44-68)        | 1.00 (0.99-1.02)        | 0.527            |                         |              |
| <b>APACHE II</b>                | <b>20 (15-26)</b>                             | <b>17 (12-22)</b> | <b>1.07 (1.04-1.10)</b> | <b>&lt;0.001</b> | <b>1.04 (1.01-1.07)</b> | <b>0.020</b> |
| Charlson score                  | 3 (1-5)                                       | 3 (2-4)           | 1.03 (0.91-1.15)        | 0.659            |                         |              |
| Underlying disease              |                                               |                   |                         |                  |                         |              |
| Myocardial infarction           | 0 (0%)                                        | 5 (0.65%)         | 0.93 (0.23-3.80)        | 0.923            |                         |              |
| Peripheral vascular disease     | 11 (13.75%)                                   | 57 (7.44%)        | 1.61 (0.85-3.04)        | 0.143            |                         |              |
| Cerebrovascular disease         | 3 (3.75%)                                     | 33 (4.31%)        | 1.01 (0.32-3.21)        | 0.983            |                         |              |
| Dementia                        | 0 (0%)                                        | 0 (0%)            | /                       | /                |                         |              |
| Connective tissue disease       | 1 (1.25%)                                     | 11 (1.44%)        | 0.91 (0.13-6.52)        | 0.921            |                         |              |
| Peptic ulcer                    | 3 (3.75%)                                     | 23 (3.00%)        | 1.06 (0.33-3.36)        | 0.923            |                         |              |
| Hemiplegia                      | 1 (1.25%)                                     | 0 (0%)            | 4.30 (0.59-31.23)       | 0.149            |                         |              |
| Hypertension                    | 18 (22.50%)                                   | 173 (22.58%)      | 1.07 (0.63-1.80)        | 0.810            |                         |              |
| Tuberculosis                    | 1 (1.25%)                                     | 12 (1.57%)        | 0.65 (0.09-4.68)        | 0.669            |                         |              |
| <b>COPD</b>                     | <b>11 (13.75%)</b>                            | <b>45 (5.87%)</b> | <b>2.19 (1.16-4.13)</b> | <b>0.016</b>     | <b>2.42 (1.23-4.76)</b> | <b>0.011</b> |

|    |                       |                    |                     |                         |                  |                         |                  |
|----|-----------------------|--------------------|---------------------|-------------------------|------------------|-------------------------|------------------|
| 1  |                       |                    |                     |                         |                  |                         |                  |
| 2  |                       |                    |                     |                         |                  |                         |                  |
| 3  |                       |                    |                     |                         |                  |                         |                  |
| 4  |                       |                    |                     |                         |                  |                         |                  |
| 5  | Respiratory failure   | 34 (42.50%)        | 143 (18.67%)        | 2.52 (1.61-3.93)        | <0.001           |                         |                  |
| 6  | Kidney failure        | 5 (6.25%)          | 35 (4.57%)          | 1.22 (0.49-3.02)        | 0.667            |                         |                  |
| 7  | Heart failure         | 2 (2.50%)          | 21 (2.74%)          | 0.93 (0.23-3.80)        | 0.923            |                         |                  |
| 8  | Diabetes              | 11 (13.75%)        | 101 (13.19%)        | 1.00 (0.53-1.89)        | 0.998            |                         |                  |
| 9  | Liver dysfunction     | <b>14 (17.50%)</b> | <b>32 (4.18%)</b>   | <b>3.42 (1.92-6.11)</b> | <b>&lt;0.001</b> | <b>2.12 (1.15-3.93)</b> | <b>0.016</b>     |
| 10 | Hematological disease | 42 (52.50%)        | 261 (34.07%)        | 2.05 (1.32-3.18)        | 0.001            |                         |                  |
| 11 | Pancreatitis          | 17 (21.25%)        | 84 (10.97%)         | 1.78 (1.04-3.05)        | 0.035            |                         |                  |
| 12 |                       |                    |                     |                         |                  |                         |                  |
| 13 |                       |                    |                     |                         |                  |                         |                  |
| 14 | Medical operation     |                    |                     |                         |                  |                         |                  |
| 15 |                       |                    |                     |                         |                  |                         |                  |
| 16 | Surgery               | 62 (77.50%)        | 638 (83.29%)        | 0.94 (0.56-1.60)        | 0.830            |                         |                  |
| 17 | CVC                   | 61 (76.25%)        | 414 (54.05%)        | 2.18 (1.30-3.65)        | 0.003            |                         |                  |
| 18 | Ventilator            | 72 (90.00%)        | 648 (84.60%)        | 1.80 (0.87-3.74)        | 0.115            |                         |                  |
| 19 | Indwelling catheter   | 78 (97.50%)        | 729 (95.17%)        | 2.03 (0.50-8.28)        | 0.325            |                         |                  |
| 20 | Tube feeding          | 54 (67.50%)        | 265 (34.60%)        | 2.34 (1.46-3.75)        | <0.001           |                         |                  |
| 21 | Nebulizer fiberoptic  | 51 (63.75%)        | 349 (45.56%)        | 1.34 (0.85-2.12)        | 0.213            |                         |                  |
| 22 | Bronchoscope          | 5 (6.25%)          | 17 (2.22%)          | 2.39 (0.97-5.93)        | 0.060            |                         |                  |
| 23 |                       |                    |                     |                         |                  |                         |                  |
| 24 | Antimicrobial use     |                    |                     |                         |                  |                         |                  |
| 25 |                       |                    |                     |                         |                  |                         |                  |
| 26 | Cephalosporin         | 15 (18.75%)        | 210 (27.42%)        | 0.57 (0.33-1.00)        | 0.051            |                         |                  |
| 27 | Vancomycin            | 2 (2.50%)          | 28 (3.66%)          | 0.70 (0.17-2.84)        | 0.615            |                         |                  |
| 28 | Aminoglycosides       | 1 (1.25%)          | 15 (1.96%)          | 0.46 (0.06-3.32)        | 0.443            |                         |                  |
| 29 | Carbapenems           | <b>58 (72.50%)</b> | <b>284 (37.08%)</b> | <b>3.77 (2.30-6.16)</b> | <b>&lt;0.001</b> | <b>2.70 (1.56-4.67)</b> | <b>&lt;0.001</b> |
| 30 | Fluoroquinolones      | 21 (26.25%)        | 127 (16.58%)        | 1.29 (0.78-2.14)        | 0.316            |                         |                  |
| 31 | Antifungal agents     | 17 (21.25%)        | 123 (16.06%)        | 1.19 (0.70-2.04)        | 0.525            |                         |                  |
| 32 | Cephamycins           | 12 (15.00%)        | 179 (23.37%)        | 0.54 (0.29-1.00)        | 0.049            |                         |                  |
| 33 | Lincomycin            | 3 (3.75%)          | 32 (4.18%)          | 0.75 (0.24-2.39)        | 0.632            |                         |                  |
| 34 | Tigecycline           | 8 (10.00%)         | 53 (6.92%)          | 1.34 (0.64-2.77)        | 0.438            |                         |                  |
| 35 |                       |                    |                     |                         |                  |                         |                  |
| 36 |                       |                    |                     |                         |                  |                         |                  |
| 37 |                       |                    |                     |                         |                  |                         |                  |
| 38 |                       |                    |                     |                         |                  |                         |                  |
| 39 |                       |                    |                     |                         |                  |                         |                  |
| 40 |                       |                    |                     |                         |                  |                         |                  |
| 41 |                       |                    |                     |                         |                  |                         |                  |
| 42 |                       |                    |                     |                         |                  |                         |                  |
| 43 |                       |                    |                     |                         |                  |                         |                  |
| 44 |                       |                    |                     |                         |                  |                         |                  |
| 45 |                       |                    |                     |                         |                  |                         |                  |
| 46 |                       |                    |                     |                         |                  |                         |                  |

1  
2  
3  
4  
5  
6  
7  
8  
9  
10  
11  
12  
13  
14  
15  
16  
17  
18  
19  
20  
21  
22  
23  
24  
25  
26  
27  
28  
29  
30  
31  
32  
33  
34  
35  
36  
37  
38  
39  
40  
41  
42  
43  
44  
45  
46

COPD, chronic obstructive pulmonary disease. CVC, central venous catheter.

Variables with  $P < 0.05$  in the multivariate COX analysis are highlighted in bold.

For peer review only

Table S2. Variables associated with developing subsequent CRAB infection during the ICU stay (exposed group was those patients with ICU acquisition of CRAB intestinal carriage)

| Item                            | Subsequent CRAB infection during the ICU stay |                    | Univariate analysis     |                  | Multivariate analysis   |              |
|---------------------------------|-----------------------------------------------|--------------------|-------------------------|------------------|-------------------------|--------------|
|                                 | Yes (n=93)                                    | No (n=802)         | HR (95% CI)             | P                | HR (95% CI)             | P            |
| <b>CRAB intestinal carriage</b> | <b>32 (34.41%)</b>                            | <b>83 (10.35%)</b> | <b>3.02 (1.97-4.64)</b> | <b>&lt;0.001</b> | <b>1.81 (1.14-2.88)</b> | <b>0.012</b> |
| Demographics                    |                                               |                    |                         |                  |                         |              |
| Sex, male                       | 60 (64.52%)                                   | 513 (63.97%)       | 0.99 (0.65-1.51)        | 0.954            |                         |              |
| Ethnicity, Han Chinese          | 87 (93.55%)                                   | 731 (91.15%)       | 1.01 (0.99-1.02)        | 0.398            |                         |              |
| Age (median)                    | 54 (44-68)                                    | 55 (45-68)         | 1.42 (0.62-3.24)        | 0.410            |                         |              |
| <b>APACHE II</b>                | <b>21 (18-26)</b>                             | <b>17 (12-22)</b>  | <b>1.07 (1.05-1.10)</b> | <b>&lt;0.001</b> | <b>1.04 (1.01-1.07)</b> | <b>0.016</b> |
| Charlson score                  | 3 (1-5)                                       | 3 (2-4)            | 1.04 (0.93-1.15)        | 0.490            |                         |              |
| Underlying disease              |                                               |                    |                         |                  |                         |              |
| Myocardial infarction           | 0 (0%)                                        | 5 (0.62%)          | 0.05 (0-28290)          | 0.656            |                         |              |
| Peripheral vascular disease     | 11 (11.83%)                                   | 62 (7.73%)         | 1.36 (0.72-2.54)        | 0.344            |                         |              |
| Cerebrovascular disease         | 4 (4.30%)                                     | 36 (4.49%)         | 1.11 (0.41-3.03)        | 0.835            |                         |              |
| Dementia                        | 0 (0%)                                        | 1 (0.12%)          | 0.05 (0-24060)          | 0.651            |                         |              |
| Connective tissue disease       | 1 (1.08%)                                     | 12 (1.50%)         | 0.75 (0.10-5.35)        | 0.770            |                         |              |
| Peptic ulcer                    | 4 (4.30%)                                     | 26 (3.24%)         | 1.31 (0.48-3.58)        | 0.597            |                         |              |
| Hemiplegia                      | 1 (1.08%)                                     | 0 (0%)             | 3.99 (0.55-28.87)       | 0.17             |                         |              |
| Hypertension                    | 25 (26.88%)                                   | 191 (23.82%)       | 1.22 (0.77-1.92)        | 0.405            |                         |              |
| Tuberculosis                    | 2 (2.15%)                                     | 11 (1.37%)         | 1.19 (0.29-4.85)        | 0.805            |                         |              |



|    |                            |                    |                     |                         |                  |                         |              |
|----|----------------------------|--------------------|---------------------|-------------------------|------------------|-------------------------|--------------|
| 1  |                            |                    |                     |                         |                  |                         |              |
| 2  |                            |                    |                     |                         |                  |                         |              |
| 3  |                            |                    |                     |                         |                  |                         |              |
| 4  |                            |                    |                     |                         |                  |                         |              |
| 5  | COPD                       | 10 (10.75%)        | 54 (6.73%)          | 1.44 (0.75-2.78)        | 0.275            |                         |              |
| 6  | <b>Respiratory failure</b> | <b>44 (47.31%)</b> | <b>159 (19.83%)</b> | <b>2.70 (1.79-4.07)</b> | <b>&lt;0.001</b> | <b>1.99 (1.29-3.06)</b> | <b>0.002</b> |
| 7  | Kidney failure             | 7 (7.53%)          | 35 (4.36%)          | 1.92 (0.89-4.15)        | 0.097            |                         |              |
| 8  | Heart failure              | 3 (3.23%)          | 24 (2.99%)          | 1.52 (0.48-4.83)        | 0.475            |                         |              |
| 9  | Diabetes                   | 11 (11.83%)        | 112 (13.97%)        | 0.74 (0.40-1.39)        | 0.351            |                         |              |
| 10 | Liver dysfunction          | 13 (13.98%)        | 29 (3.62%)          | 3.11 (1.73-5.61)        | <0.001           |                         |              |
| 11 | Hematological disease      | 49 (52.69%)        | 290 (36.16%)        | 1.91 (1.27-2.87)        | 0.002            |                         |              |
| 12 | Pancreatitis               | 20 (21.51%)        | 92 (11.47%)         | 1.81 (1.10-2.97)        | 0.019            |                         |              |
| 13 |                            |                    |                     |                         |                  |                         |              |
| 14 | Medical operation          |                    |                     |                         |                  |                         |              |
| 15 |                            |                    |                     |                         |                  |                         |              |
| 16 | Surgery                    | 70 (75.27%)        | 666 (83.04%)        | 0.90 (0.56-1.45)        | 0.658            |                         |              |
| 17 | CVC                        | 68 (73.12%)        | 434 (54.11%)        | 1.86 (1.17-2.94)        | 0.008            |                         |              |
| 18 | Ventilator                 | 85 (91.40%)        | 683 (85.16%)        | 1.93 (0.94-4.00)        | 0.075            |                         |              |
| 19 | Indwelling catheter        | 91 (97.85%)        | 761 (94.89%)        | 2.34 (0.58-9.52)        | 0.235            |                         |              |
| 20 | Tube feeding               | 67 (72.04%)        | 300 (37.41%)        | 2.72 (1.72-4.29)        | <0.001           |                         |              |
| 21 | Nebulizer fiberoptic       | 64 (68.82%)        | 388 (48.38%)        | 1.56 (1.00-2.42)        | 0.050            |                         |              |
| 22 | Bronchoscope               | 5 (5.38%)          | 18 (2.24%)          | 2.00 (0.81-4.93)        | 0.133            |                         |              |
| 23 |                            |                    |                     |                         |                  |                         |              |
| 24 | Antimicrobial use          |                    |                     |                         |                  |                         |              |
| 25 |                            |                    |                     |                         |                  |                         |              |
| 26 | Cephalosporin              | 18 (19.35%)        | 213 (26.56%)        | 0.66 (0.40-1.11)        | 0.114            |                         |              |
| 27 | Vancomycin                 | 2 (2.15%)          | 33 (4.11%)          | 0.52 (0.13-2.12)        | 0.363            |                         |              |
| 28 | Aminoglycosides            | 0 (0%)             | 16 (2.00%)          | 0.05 (0.00-14.57)       | 0.297            |                         |              |
| 29 | <b>Carbapenems</b>         | <b>68 (73.12%)</b> | <b>319 (39.78%)</b> | <b>3.50 (2.21-5.54)</b> | <b>&lt;0.001</b> | <b>2.17 (1.30-3.63)</b> | <b>0.003</b> |
| 30 | Fluoroquinolones           | 28 (30.11%)        | 144 (17.96%)        | 1.49 (0.96-2.33)        | 0.079            |                         |              |
| 31 | Antifungal agents          | 16 (17.20%)        | 141 (17.58%)        | 0.92 (0.53-1.57)        | 0.749            |                         |              |
| 32 | Cephamecins                | 15 (16.13%)        | 187 (23.32%)        | 0.57 (0.33-1.00)        | 0.049            |                         |              |
| 33 | Lincomycin                 | 4 (4.30%)          | 34 (4.24%)          | 0.82 (0.30-2.24)        | 0.703            |                         |              |
| 34 |                            |                    |                     |                         |                  |                         |              |
| 35 |                            |                    |                     |                         |                  |                         |              |
| 36 |                            |                    |                     |                         |                  |                         |              |
| 37 |                            |                    |                     |                         |                  |                         |              |
| 38 |                            |                    |                     |                         |                  |                         |              |
| 39 |                            |                    |                     |                         |                  |                         |              |
| 40 |                            |                    |                     |                         |                  |                         |              |
| 41 |                            |                    |                     |                         |                  |                         |              |
| 42 |                            |                    |                     |                         |                  |                         |              |
| 43 |                            |                    |                     |                         |                  |                         |              |
| 44 |                            |                    |                     |                         |                  |                         |              |
| 45 |                            |                    |                     |                         |                  |                         |              |
| 46 |                            |                    |                     |                         |                  |                         |              |

1  
2  
3  
4  
5 Tigecycline 7 (7.53%) 57 (7.11%) 1.03 (0.47-2.22) 0.947

---

6 COPD, chronic obstructive pulmonary disease. CVC, central venous catheter.

7  
8 Variables with P < 0.05 in the multivariate COX analysis are highlighted in bold.

9  
10  
11  
12  
13  
14  
15  
16  
17  
18  
19  
20  
21  
22  
23  
24  
25  
26  
27  
28  
29  
30  
31  
32  
33  
34  
35  
36  
37  
38  
39  
40  
41  
42  
43  
44  
45  
46

For peer review only

# Reporting checklist for cohort study.

Based on the STROBE cohort guidelines.

## Instructions to authors

Complete this checklist by entering the page numbers from your manuscript where readers will find each of the items listed below.

Your article may not currently address all the items on the checklist. Please modify your text to include the missing information. If you are certain that an item does not apply, please write "n/a" and provide a short explanation.

Upload your completed checklist as an extra file when you submit to a journal.

In your methods section, say that you used the STROBE cohort reporting guidelines, and cite them as:

von Elm E, Altman DG, Egger M, Pocock SJ, Gøtzsche PC, Vandenbroucke JP. The Strengthening the Reporting of Observational Studies in Epidemiology (STROBE) Statement: guidelines for reporting observational studies.

|                           | Reporting Item                                                                                            | Page Number |
|---------------------------|-----------------------------------------------------------------------------------------------------------|-------------|
| <b>Title and abstract</b> |                                                                                                           |             |
| Title                     | <a href="#">#1a</a> Indicate the study's design with a commonly used term in the title or the abstract    | 2           |
| Abstract                  | <a href="#">#1b</a> Provide in the abstract an informative and balanced summary of what was done and what | 2           |

was found

## Introduction

Background / [#2](#) Explain the scientific background and rationale for 4-5  
 rationale the investigation being reported

Objectives [#3](#) State specific objectives, including any 5  
 prespecified hypotheses

## Methods

Study design [#4](#) Present key elements of study design early in the 7-8  
 paper

Setting [#5](#) Describe the setting, locations, and relevant dates, 5-6  
 including periods of recruitment, exposure, follow-up, and data collection

Eligibility criteria [#6a](#) Give the eligibility criteria, and the sources and 6  
 methods of selection of participants. Describe methods of follow-up.

Eligibility criteria [#6b](#) For matched studies, give matching criteria and n/a  
 number of exposed and unexposed  
 Not matched studies

Variables [#7](#) Clearly define all outcomes, exposures, predictors, 6-8  
 potential confounders, and effect modifiers. Give diagnostic criteria, if applicable

Data sources / [#8](#) For each variable of interest give sources of data 6-8  
 measurement and details of methods of assessment

(measurement). Describe comparability of assessment methods if there is more than one group. Give information separately for exposed and unexposed groups if applicable.

|                        |                      |                                                                                                                               |                                                                     |
|------------------------|----------------------|-------------------------------------------------------------------------------------------------------------------------------|---------------------------------------------------------------------|
| Bias                   | <a href="#">#9</a>   | Describe any efforts to address potential sources of bias                                                                     | 8                                                                   |
| Study size             | <a href="#">#10</a>  | Explain how the study size was arrived at                                                                                     | n/a                                                                 |
|                        |                      |                                                                                                                               | Including all the patients admitted to the ICU in the study period. |
| Quantitative variables | <a href="#">#11</a>  | Explain how quantitative variables were handled in the analyses. If applicable, describe which groupings were chosen, and why | 7                                                                   |
| Statistical methods    | <a href="#">#12a</a> | Describe all statistical methods, including those used to control for confounding                                             | 7-8                                                                 |
| Statistical methods    | <a href="#">#12b</a> | Describe any methods used to examine subgroups and interactions                                                               | 8                                                                   |
| Statistical methods    | <a href="#">#12c</a> | Explain how missing data were addressed                                                                                       | n/a                                                                 |
|                        |                      |                                                                                                                               | No missing data.                                                    |
| Statistical methods    | <a href="#">#12d</a> | If applicable, explain how loss to follow-up was addressed                                                                    | n/a                                                                 |
|                        |                      |                                                                                                                               | Not applicable                                                      |

|    |                  |                      |                                                      |                  |
|----|------------------|----------------------|------------------------------------------------------|------------------|
| 1  | Statistical      | <a href="#">#12e</a> | Describe any sensitivity analyses                    | n/a              |
| 2  |                  |                      |                                                      |                  |
| 3  | methods          |                      |                                                      | Not done.        |
| 4  |                  |                      |                                                      |                  |
| 5  |                  |                      |                                                      |                  |
| 6  |                  |                      |                                                      |                  |
| 7  | <b>Results</b>   |                      |                                                      |                  |
| 8  |                  |                      |                                                      |                  |
| 9  |                  |                      |                                                      |                  |
| 10 | Participants     | <a href="#">#13a</a> | Report numbers of individuals at each stage of       | 9                |
| 11 |                  |                      | study—eg numbers potentially eligible, examined      |                  |
| 12 |                  |                      | for eligibility, confirmed eligible, included in the |                  |
| 13 |                  |                      | study, completing follow-up, and analysed. Give      |                  |
| 14 |                  |                      | information separately for for exposed and           |                  |
| 15 |                  |                      | unexposed groups if applicable.                      |                  |
| 16 |                  |                      |                                                      |                  |
| 17 |                  |                      |                                                      |                  |
| 18 |                  |                      |                                                      |                  |
| 19 |                  |                      |                                                      |                  |
| 20 |                  |                      |                                                      |                  |
| 21 |                  |                      |                                                      |                  |
| 22 |                  |                      |                                                      |                  |
| 23 |                  |                      |                                                      |                  |
| 24 |                  |                      |                                                      |                  |
| 25 | Participants     | <a href="#">#13b</a> | Give reasons for non-participation at each stage     | 9                |
| 26 |                  |                      |                                                      |                  |
| 27 |                  |                      |                                                      |                  |
| 28 | Participants     | <a href="#">#13c</a> | Consider use of a flow diagram                       | Figure 1         |
| 29 |                  |                      |                                                      |                  |
| 30 |                  |                      |                                                      |                  |
| 31 | Descriptive data | <a href="#">#14a</a> | Give characteristics of study participants (eg       | 19-23            |
| 32 |                  |                      | demographic, clinical, social) and information on    |                  |
| 33 |                  |                      | exposures and potential confounders. Give            |                  |
| 34 |                  |                      | information separately for exposed and unexposed     |                  |
| 35 |                  |                      | groups if applicable.                                |                  |
| 36 |                  |                      |                                                      |                  |
| 37 |                  |                      |                                                      |                  |
| 38 |                  |                      |                                                      |                  |
| 39 |                  |                      |                                                      |                  |
| 40 |                  |                      |                                                      |                  |
| 41 |                  |                      |                                                      |                  |
| 42 |                  |                      |                                                      |                  |
| 43 | Descriptive data | <a href="#">#14b</a> | Indicate number of participants with missing data    | n/a              |
| 44 |                  |                      | for each variable of interest                        |                  |
| 45 |                  |                      |                                                      | No missing data. |
| 46 |                  |                      |                                                      |                  |
| 47 |                  |                      |                                                      |                  |
| 48 |                  |                      |                                                      |                  |
| 49 | Descriptive data | <a href="#">#14c</a> | Summarise follow-up time (eg, average and total      | Figure 2         |
| 50 |                  |                      | amount)                                              |                  |
| 51 |                  |                      |                                                      |                  |
| 52 |                  |                      |                                                      |                  |
| 53 |                  |                      |                                                      |                  |
| 54 |                  |                      |                                                      |                  |
| 55 | Outcome data     | <a href="#">#15</a>  | Report numbers of outcome events or summary          | 19-23            |
| 56 |                  |                      | measures over time. Give information separately      |                  |
| 57 |                  |                      |                                                      |                  |
| 58 |                  |                      |                                                      |                  |
| 59 |                  |                      |                                                      |                  |
| 60 |                  |                      |                                                      |                  |

|    |                   |                                                                           |                       |
|----|-------------------|---------------------------------------------------------------------------|-----------------------|
| 1  |                   | for exposed and unexposed groups if applicable.                           |                       |
| 2  |                   |                                                                           |                       |
| 3  |                   |                                                                           |                       |
| 4  | Main results      | <a href="#">#16a</a> Give unadjusted estimates and, if applicable,        | 19-23                 |
| 5  |                   |                                                                           |                       |
| 6  |                   | confounder-adjusted estimates and their precision                         |                       |
| 7  |                   |                                                                           |                       |
| 8  |                   | (eg, 95% confidence interval). Make clear which                           |                       |
| 9  |                   |                                                                           |                       |
| 10 |                   | confounders were adjusted for and why they were                           |                       |
| 11 |                   |                                                                           |                       |
| 12 |                   | included                                                                  |                       |
| 13 |                   |                                                                           |                       |
| 14 |                   |                                                                           |                       |
| 15 |                   |                                                                           |                       |
| 16 | Main results      | <a href="#">#16b</a> Report category boundaries when continuous           | n/a                   |
| 17 |                   |                                                                           |                       |
| 18 |                   | variables were categorized                                                |                       |
| 19 |                   |                                                                           | Continuous variables  |
| 20 |                   |                                                                           |                       |
| 21 |                   |                                                                           | were not categorized. |
| 22 |                   |                                                                           |                       |
| 23 |                   |                                                                           |                       |
| 24 | Main results      | <a href="#">#16c</a> If relevant, consider translating estimates of       | n/a                   |
| 25 |                   |                                                                           |                       |
| 26 |                   | relative risk into absolute risk for a meaningful time                    |                       |
| 27 |                   |                                                                           | Not applicable        |
| 28 |                   | period                                                                    |                       |
| 29 |                   |                                                                           |                       |
| 30 |                   |                                                                           |                       |
| 31 |                   |                                                                           |                       |
| 32 | Other analyses    | <a href="#">#17</a> Report other analyses done—e.g., analyses of          | Supplementary files   |
| 33 |                   |                                                                           |                       |
| 34 |                   | subgroups and interactions, and sensitivity                               |                       |
| 35 |                   |                                                                           |                       |
| 36 |                   | analyses                                                                  |                       |
| 37 |                   |                                                                           |                       |
| 38 |                   |                                                                           |                       |
| 39 | <b>Discussion</b> |                                                                           |                       |
| 40 |                   |                                                                           |                       |
| 41 |                   |                                                                           |                       |
| 42 | Key results       | <a href="#">#18</a> Summarise key results with reference to study         | 11-13                 |
| 43 |                   |                                                                           |                       |
| 44 |                   | objectives                                                                |                       |
| 45 |                   |                                                                           |                       |
| 46 |                   |                                                                           |                       |
| 47 |                   |                                                                           |                       |
| 48 | Limitations       | <a href="#">#19</a> Discuss limitations of the study, taking into account | 13                    |
| 49 |                   |                                                                           |                       |
| 50 |                   | sources of potential bias or imprecision. Discuss                         |                       |
| 51 |                   |                                                                           |                       |
| 52 |                   | both direction and magnitude of any potential bias.                       |                       |
| 53 |                   |                                                                           |                       |
| 54 |                   |                                                                           |                       |
| 55 | Interpretation    | <a href="#">#20</a> Give a cautious overall interpretation considering    | 11-13                 |
| 56 |                   |                                                                           |                       |
| 57 |                   | objectives, limitations, multiplicity of analyses,                        |                       |
| 58 |                   |                                                                           |                       |
| 59 |                   |                                                                           |                       |
| 60 |                   |                                                                           |                       |

1 results from similar studies, and other relevant

2 evidence.

3  
4  
5  
6 Generalisability [#21](#) Discuss the generalisability (external validity) of 13  
7 the study results

8  
9  
10  
11 Other

12  
13 Information

14  
15  
16 Funding [#22](#) Give the source of funding and the role of the 14  
17 funders for the present study and, if applicable, for  
18 the original study on which the present article is  
19 based  
20  
21  
22  
23  
24  
25

26 None The STROBE checklist is distributed under the terms of the Creative Commons Attribution  
27 License CC-BY. This checklist can be completed online using <https://www.goodreports.org/>, a tool  
28 made by the [EQUATOR Network](#) in collaboration with [Penelope.ai](#)  
29  
30  
31  
32  
33  
34  
35  
36  
37  
38  
39  
40  
41  
42  
43  
44  
45  
46  
47  
48  
49  
50  
51  
52  
53  
54  
55  
56  
57  
58  
59  
60



# BMJ Open

## Intestinal carriage of carbapenem-resistant *Acinetobacter baumannii* among patients in the intensive care unit: risk factors and the impact on subsequent infection

|                                 |                                                                                                                                                                                                                                                                                                                                                                                                                                                                                                                                                                                                                                                                                                                                                                                                                                                                       |
|---------------------------------|-----------------------------------------------------------------------------------------------------------------------------------------------------------------------------------------------------------------------------------------------------------------------------------------------------------------------------------------------------------------------------------------------------------------------------------------------------------------------------------------------------------------------------------------------------------------------------------------------------------------------------------------------------------------------------------------------------------------------------------------------------------------------------------------------------------------------------------------------------------------------|
| Journal:                        | <i>BMJ Open</i>                                                                                                                                                                                                                                                                                                                                                                                                                                                                                                                                                                                                                                                                                                                                                                                                                                                       |
| Manuscript ID                   | bmjopen-2019-035893.R1                                                                                                                                                                                                                                                                                                                                                                                                                                                                                                                                                                                                                                                                                                                                                                                                                                                |
| Article Type:                   | Original research                                                                                                                                                                                                                                                                                                                                                                                                                                                                                                                                                                                                                                                                                                                                                                                                                                                     |
| Date Submitted by the Author:   | 01-Apr-2020                                                                                                                                                                                                                                                                                                                                                                                                                                                                                                                                                                                                                                                                                                                                                                                                                                                           |
| Complete List of Authors:       | Qiao, Fu; Sichuan University West China Hospital, Department of Infection Control<br>Huang, Wenzhi; Sichuan University West China Hospital, Department of Infection Control<br>Gao, Shan; Zhengzhou University First Affiliated Hospital, Department of Infection Control<br>Cai, Lin; Sichuan University West China Hospital, Intensive Care Unit<br>Zhu, Shichao; Sichuan University West China Hospital, Department of Infection Control<br>Wei, Li; Sichuan University West China Hospital, Department of Infection Control<br>Kang, Yan; Sichuan University West China Hospital, Intensive Care Unit<br>Tao, Chuanmin; Sichuan University West China Hospital, Department of Laboratory Medicine<br>Zong, Zhiyong; Sichuan University West China Hospital, Department of Infection Control; Sichuan University West China Hospital, Center of Infectious Disease |
| <b>Primary Subject Heading</b>: | Epidemiology                                                                                                                                                                                                                                                                                                                                                                                                                                                                                                                                                                                                                                                                                                                                                                                                                                                          |
| Secondary Subject Heading:      | Infectious diseases                                                                                                                                                                                                                                                                                                                                                                                                                                                                                                                                                                                                                                                                                                                                                                                                                                                   |
| Keywords:                       | EPIDEMIOLOGY, Adult intensive & critical care < INTENSIVE & CRITICAL CARE, Infection control < INFECTIOUS DISEASES                                                                                                                                                                                                                                                                                                                                                                                                                                                                                                                                                                                                                                                                                                                                                    |
|                                 |                                                                                                                                                                                                                                                                                                                                                                                                                                                                                                                                                                                                                                                                                                                                                                                                                                                                       |

SCHOLARONE™  
Manuscripts



I, the Submitting Author has the right to grant and does grant on behalf of all authors of the Work (as defined in the below author licence), an exclusive licence and/or a non-exclusive licence for contributions from authors who are: i) UK Crown employees; ii) where BMJ has agreed a CC-BY licence shall apply, and/or iii) in accordance with the terms applicable for US Federal Government officers or employees acting as part of their official duties; on a worldwide, perpetual, irrevocable, royalty-free basis to BMJ Publishing Group Ltd ("BMJ") its licensees and where the relevant Journal is co-owned by BMJ to the co-owners of the Journal, to publish the Work in this journal and any other BMJ products and to exploit all rights, as set out in our [licence](#).

The Submitting Author accepts and understands that any supply made under these terms is made by BMJ to the Submitting Author unless you are acting as an employee on behalf of your employer or a postgraduate student of an affiliated institution which is paying any applicable article publishing charge ("APC") for Open Access articles. Where the Submitting Author wishes to make the Work available on an Open Access basis (and intends to pay the relevant APC), the terms of reuse of such Open Access shall be governed by a Creative Commons licence – details of these licences and which [Creative Commons](#) licence will apply to this Work are set out in our licence referred to above.

Other than as permitted in any relevant BMJ Author's Self Archiving Policies, I confirm this Work has not been accepted for publication elsewhere, is not being considered for publication elsewhere and does not duplicate material already published. I confirm all authors consent to publication of this Work and authorise the granting of this licence.

1  
2  
3  
4 1 **Intestinal carriage of carbapenem-resistant *Acinetobacter baumannii***  
5  
6  
7 2 **among patients in the intensive care unit: risk factors and the**  
8  
9 3 **impact on subsequent infection**  
10  
11

12 4 Fu Qiao<sup>1</sup>, Wenzhi Huang<sup>1</sup>, Shan Gao<sup>2</sup>, Lin Cai<sup>3</sup>, Shichao Zhu<sup>1</sup>, Li Wei<sup>1</sup>, Yan Kang<sup>3</sup>,  
13  
14  
15 5 Chuanmin Tao<sup>4\*</sup>, Zhiyong Zong<sup>1,5\*</sup>  
16

17 6 <sup>1</sup> Department of Infection Control, West China Hospital, Sichuan University, Chengdu, China.

18  
19 7 <sup>2</sup> Department of Infection Control, The First Affiliated Hospital of Zhengzhou University,

20  
21 8 Zhengzhou, China. <sup>3</sup> Intensive Care Unit, West China Hospital, Sichuan University, Chengdu,

22  
23 9 China. <sup>4</sup> Department of Laboratory Medicine, West China Hospital, Sichuan University,

24  
25 10 Chengdu, China. <sup>5</sup> Center of Infectious Disease, West China Hospital, Sichuan University,

26  
27 11 Chengdu, China  
28  
29  
30  
31  
32

33 13 **Running title: intestinal carriage of CRAB in ICU**  
34  
35  
36 14

37  
38 15 Keywords: carbapenem-resistant; *Acinetobacter baumannii*; intestinal carriage; intensive care unit.  
39

40 16 Word count: 3147  
41

42 17 **\*Co-corresponding author**  
43

44 18 Dr. Chuanmin Tao, Department of Laboratory Medicine, West China Hospital, Sichuan  
45  
46

47 19 University, Chengdu, China. Email: [taocm@scu.edu.cn](mailto:taocm@scu.edu.cn)  
48

49 20 Dr. Zhiyong Zong, Center of Infectious Diseases, West China Hospital (Huaxi), Guoxuexiang 37,  
50

51 21 Chengdu 610041, China. Phone: 86-28-8542-2637. Fax: 86-28-8542-3212. E-mail:  
52

53  
54 22 [zongzhiyong@gmail.com](mailto:zongzhiyong@gmail.com)  
55  
56  
57  
58  
59  
60

## 23 Abstract

24 **Objectives:** To assess the incidence and the impact of carbapenem-resistant *Acinetobacter*  
25 *baumannii* (CRAB) intestinal carriage on subsequent CRAB infection and to study risk factors of  
26 acquiring CRAB intestinal carriage among patients in intensive care unit (ICU).

27 **Design:** Observational study including a case control study and a retrospective cohort study.

28 **Setting:** A 50-bed general ICU of a university hospital, China.

29 **Methods:** From May 2017 to April 2018, an observational study was conducted in a 50-bed  
30 general ICU of a university hospital in China. Rectal swabs were collected from ICU patients on  
31 admission and thereafter weekly. A case control study was performed to analyze risk factors of the  
32 acquisition of CRAB intestinal carriage in ICU using multiple logistic regression. A retrospective  
33 cohort study was performed to address whether intestinal CRAB carriage could lead to an  
34 increased likelihood of subsequent CRAB infection using sub-distribution hazard model  
35 regarding death in the ICU as a competing risk event.

36 **Results:** CRAB intestinal carriage was detected in 6.87% (66/961; 95% CI 5.27%–8.47%) of  
37 patients on ICU admission, whereas 11.97% (115/961; 95% CI 9.91%–14.02%) of patients  
38 acquired CRAB intestinal carriage during the ICU stay. Pancreatitis (OR 2.16, 95% CI 1.28–3.67),  
39 hematological disease (OR 2.26, 95% CI 1.42–3.58), gastric tube feeding (OR 3.35, 95% CI 2.03–  
40 5.51), and use of carbapenems (OR 1.84, 95% CI 1.11–3.07) were independent risk factors for  
41 acquiring CRAB intestinal carriage. The incidence of subsequent CRAB infection was 2.24-fold  
42 in patients with CRAB intestinal carriage compared to that in patients without (95% CI 1.48–3.39,  
43  $P<0.001$ ).

44 **Conclusion:** More patients acquired CRAB intestinal carriage during their ICU stay than had on  
45 admission. Severity of illness, acute pancreatitis, tube feeding, and use of carbapenems were

1  
2  
3 46 independent risk factors of acquisition of CRAB intestinal carriage. Patients with CRAB intestinal  
4  
5 47 carriage are more likely to develop CRAB infection.  
6  
7

8 48

9  
10 49 **Strengths and limitations of this study**

11  
12 50 A case control study was performed to analyze risk factors of the acquisition of CRAB intestinal  
13  
14 51 carriage in ICU.  
15

16  
17 52 A retrospective cohort study was performed to address whether intestinal CRAB carriage was  
18  
19 53 associated with subsequent CRAB infection.  
20

21 54 Most influencing factors were considered in the study.  
22

23  
24 55 Not all screened CRABs were confirmed using Vitek II or other methods.  
25  
26  
27  
28  
29  
30  
31  
32  
33  
34  
35  
36  
37  
38  
39  
40  
41  
42  
43  
44  
45  
46  
47  
48  
49  
50  
51  
52  
53  
54  
55

## 57 **Background**

58 *Acinetobacter baumannii* is one of the most common nosocomial pathogens in Asia and  
59 South America[1]. A systematic review has revealed that *A. baumannii* accounted for 11.28% of  
60 nosocomial infections in general hospitals in China, making it the third most common nosocomial  
61 pathogen[2]. And carbapenem-resistant *A. baumannii* (CRAB) has emerged worldwide. As early  
62 as 2013, the US Centers for Disease Control and Prevention listed multi-drug resistant *A.*  
63 *baumannii* (MDRAB) including CRAB as a serious threat[3], and the World Health Organization  
64 listed CRAB as one of the three most critical threats in a global drug-resistant warning in 2017[4].  
65 The prevalence of *A. baumannii* and its resistance to carbapenems varies from country to country.  
66 For instance, the European Bacterial Resistance Surveillance Report shows that the rate of  
67 *Acinetobacter* resistant to carbapenem in Europe in 2017 was 33.4% (95% CI 32%–35%), but it  
68 was as high as 96.2% in Croatia (95% CI 92%–98%) [5]. In the US, 49.5% of *A. baumannii* is  
69 resistant to carbapenems, while in Singapore, India, and Pakistan, it is 50%, 85%, and 62-100%,  
70 respectively[6,7]. The prevalence of CRAB is also very high in China. The surveillance data  
71 released by CHINET (China Antimicrobial Surveillance Network; <http://chinets.com/Chinet>), a  
72 national network in China, have shown that 77.1% and 78.1% of *A. baumannii* isolates resistant to  
73 imipenem and meropenem, respectively[8].

74 Infections caused by CRAB can lead to serious consequences. A previous study has  
75 demonstrated that patients with CRAB infection had longer average length of stay (LOS) in ICUs  
76 (13.1 vs. 10.5 days) and \$11,359 higher average in-hospital costs than those with carbapenem-  
77 susceptible *A. baumannii* (CSAB) infection[9]. Another previous study has found that the  
78 mortality rate of patients with CRAB infection is 2.22-fold that of patients with CSAB  
79 infection[10]. A case-control study conducted by our team have also showed that the 28-day

1  
2  
3 80 survival rate of patients with bloodstream CRAB infection was 66.17%, lower than the 96.95% of  
4  
5 81 those with bloodstream CSAB infection[11].  
6

7  
8 82 It is well known that *A. baumannii* including CRAB may colonized in the respiratory tract of  
9  
10 83 hospitalized patients, in particular those with mechanical ventilation[12,13]. The colonization of  
11  
12 84 CRAB in the respiratory tract has been found as a major risk factor for subsequent CRAB  
13  
14 85 infection[14]. However, ICU patients may carry CRAB in intestine on admission or acquire CRAB  
15  
16 86 during the ICU stay[15]. Patients with intestinal carriage of multi-drug resistant organisms  
17  
18 87 (MDRO), in particular carbapenem-resistant *Enterobacteriaceae* (CRE), may sever as a reservoir  
19  
20 88 for further dissemination in ICU[16] and could be associated with be associated with an increased  
21  
22 89 risk of subsequent MDRO infections[17]. Therefore, active screening the carriage of CRE, which  
23  
24 90 is usually performed using rectal swabs, has been recommended as a core component of the  
25  
26 91 infection control bundle[7]. However, by contrast to CRE, the prevalence of CRAB intestinal  
27  
28 92 carriage among ICU patients is much less studied and the risk factors of acquisition of CRAB  
29  
30 93 intestinal carriage remains largely unknown. In addition, it remains to be determined whether  
31  
32 94 CRAB intestinal carriage leads to increased risks of subsequent CRAB infection. To address these  
33  
34 95 questions, we therefore conducted this study.  
35  
36  
37  
38  
39  
40  
41

## 42 97 **Methods**

### 43 98 **Study settings**

44  
45 99 An observational study was conducted in a 50-bed general ICU of a 4,300-bed university  
46  
47 100 hospital in China. From May 2017 to April 2018, all patients admitted to the ICU were subjected  
48  
49 101 to collecting a rectal swab within 48 h of admission and thereafter weekly. For patients hospitalized  
50  
51 102 for less than 3 days, a rectal swab was collected only once within 48 h of admission.  
52  
53  
54  
55  
56  
57  
58  
59  
60

103

**104 Inclusion and exclusion criteria**

105 Inclusion criteria: This study included all patients who were  $\geq 18$  years of age, admitted to  
106 the ICU, and underwent collection of rectal swabs.

107 Exclusion criteria: 1) patients who did not receive a rectal swab within 48 h of admission to  
108 ICU; or 2) patients who were eligible for weekly follow-up collection of rectal swabs but did not  
109 receive subsequent sampling; or 3) patients with CRAB infection on admission.

110

111

**112 Definitions**

113 Patients with CRAB intestinal carriage were defined as those with CRAB isolated from a  
114 rectal swab, while patient without CRAB intestinal carriage referred to those whose swabs were  
115 all negative for CRAB during the ICU stay. Patients with CRAB isolated from a rectal swab  
116 collected within 48 h of ICU admission were defined as those with CRAB intestinal carriage on  
117 ICU admission. The acquisition of CRAB intestinal carriage referred to a patient who had a CRAB-  
118 negative rectal swab collected within 48 h of ICU admission but had CRAB from a swab collected  
119 after 48 h. CRAB infection was defined as the growth of CRAB from clinical specimens in the  
120 presence of clinical manifestations of infection[18]. Subsequent CRAB infection referred to  
121 CRAB infection developed after the collection of a CRAB-positive rectal swab for patients with  
122 CRAB intestinal carriage and CRAB infection developed after 48 h admission to the ICU for  
123 patients without CRAB intestinal carriage.

**124 Screening for CRAB by rectal swabs**

125 For collecting rectal swabs, ready-to-use transport medium swabs (HBPT004; Hopebio



1  
2  
3 126 Biotechnology, Qingdao, China) was inserted about 2–3 cm into the patient's anus and then gently  
4  
5 127 rotated. After sampling, the swab was inserted into the ready-to-use transport medium and  
6  
7  
8 128 transported to the laboratory within 2 h. Rectal swabs were inoculated onto modified CHROMagar  
9  
10 129 *Acinetobacter* colorimetric plates (Chromagar; Paris, France) containing 2 mg/L meropenem using  
11  
12 130 the partition-and-streaking method[19,20]. Plates were then cultured at 37°C for 18–24 h[20].  
13  
14

15 131

### 17 132 **Data collection and statistical analysis**

19 133 In this study, the patient's demographic data, underlying diseases, invasive procedures,  
20  
21 134 medical orders, and use of antimicrobial agents were retrieved from the electronic medical record  
22  
23  
24 135 system. Two professional statisticians collaborated to clean the data.  
25

26 136 We performed two types of comparison. First, a case control study was performed to analyze  
27  
28 137 risk factors of the acquisition of CRAB intestinal carriage in ICU. Patients with ICU acquisition  
29  
30 138 of CRAB intestinal carriage were assigned to the case group, while those without CRAB intestinal  
31  
32  
33 139 carriage during their ICU stay were assigned to the control group. All potential factors were  
34  
35 140 initially subjected to the univariate analysis. Quantitative data were described by the median  
36  
37  
38 141 (interquartile range) and were then analyzed using a rank-sum test. Qualitative data were described  
39  
40 142 by number of cases (composition ratio) and were then analyzed using the chi-square test or Fisher  
41  
42 143 exact probability method when applied. All variables showing *P* value less than 0.2 in the  
43  
44 144 univariate analysis were then included into the multiple logistic regression using the forward  
45  
46  
47 145 selection stepwise regression method[21,22]. Odds ratio (OR) and 95% confidence interval (CI)  
48  
49 146 were calculated. The Hosmer-Lemeshow method was used to test the goodness-of-fit of the  
50  
51 147 multiple logistic model[23].  
52

54 148 Second, a retrospective cohort study was performed to address whether intestinal CRAB  
55  
56

1  
2  
3 149 carriage could lead to an increased likelihood of subsequent CRAB infection. In this cohort study,  
4  
5 150 the exposed group comprised patients with CRAB intestinal carriage either detected on ICU  
6  
7  
8 151 admission or acquired during the ICU stay, while the non-exposed group consisted of those without  
9  
10 152 CRAB intestinal carriage. As the impact of CRAB intestinal carriage on subsequent infection may  
11  
12 153 also be influenced by other factors such as patient demographics, underlying diseases,  
13  
14 154 antimicrobial use and medical operations, we included these factors for analysis instead of  
15  
16  
17 155 evaluating CRAB carriage alone. Survival curves (probability of CRAB infection) in patients with  
18  
19 156 and without CRAB intestinal carriage were mapped using the Fine and Gray model regarding death  
20  
21  
22 157 in the ICU as a competing risk event [24,25]. After introducing the interaction term of time and  
23  
24 158 each variable ( $X \cdot \ln(T)$ ) into the COX model [24,25], the proportional hazards hypothesis was  
25  
26 159 tested, and the results showed no statistical significance ( $P < 0.05$ ). Therefore, sub-distribution  
27  
28 160 hazard model was used to obtain sub-distribution hazard ratios (SDHRs) and to explore whether  
29  
30  
31 161 CRAB intestinal carriage was a risk factor for subsequent CRAB infection for competing events  
32  
33 162 (R package “cmprsk”)The Akaike information criteria (AIC) was used to select the multivariate  
34  
35 163 model[26]. We also performed subgroup analyses to investigate whether CRAB intestinal carriage  
36  
37  
38 164 on ICU admission and that acquired in ICU had different impact on subsequent CRAB infection  
39  
40 165 using the same statistical method as describe above. For the subgroup analysis, patients with  
41  
42 166 CRAB intestinal carriage on ICU admission and those with ICU acquisition of CRAB intestinal  
43  
44  
45 167 carriage were assigned to two exposed subgroups, respectively, while those without CRAB  
46  
47 168 intestinal carriage were assigned to the non-exposed group.

49 169 All statistical analyses were performed using SPSS 21.0 (IBM–SPSS Inc; Armonk, NY, US)  
50  
51 170 and R version 3.5.3 with a 0.05 two-sided test level.

54 171

## 172 **Patient and public involvement**

173 Patients were not involved in this study.

## 175 **Results**

### 176 **Some patients (6.87%) had CRAB intestinal carriage on ICU admission and more (12.85%)** 177 **acquired in ICU**

178 From May 1, 2017 to April 30, 2018, a total of 1,605 patients were admitted to the ICU, of  
179 which 382 (23.8%) were not screened during their hospital stay. Of which the 382 patients, 323  
180 (84.55%) stayed in the ICU for no more than 2 days, while the other 59 (15.45%) patients were  
181 missed for sampling. In addition, 118 patients (118/1,605, 7.4%) were excluded due to  
182 inappropriate or incomplete sampling including 104 patients whose first rectal swab was collected  
183 48 h after admission and 14 patients who were not screened weekly. A total of 144 (144/1,605,  
184 8.97%) had CRAB infection on ICU admission and were therefore also excluded. Taken together,  
185 a total of 961 patients (620 males, 64.52% and 341 female 35.48%) were included in the analysis,  
186 with an average age of 54 (44–68) years (Figure 1).

187 Among the 961 patients, 66 (6.87%, 95% CI 5.27%–8.47%) had CRAB intestinal carriage on  
188 ICU admission. For the remaining 895 patients, 115 acquired (12.85%, 95% CI 10.66%–15.04%)  
189 CRAB intestinal carriage during their ICU stay with an average age of 51 (40–70) and a 1.61  
190 male/female ratio (71 male and 44 female).

### 192 **Multiple risks factors of acquiring CRAB intestinal carriage were identified**

193 The univariate analysis showed that APACHE II score (the patient's disease severity),  
194 respiratory failure, renal dysfunction, hematological disease, acute pancreatitis, indwelling central

1  
2  
3 195 venous catheter, gastric tube feeding, nebulization, and use of vancomycin, aminoglycosides,  
4  
5 196 carbapenems, tigecycline, and antifungal agents are risk factors for the acquisition of CRAB  
6  
7  
8 197 intestinal carriage in the ICU. Multiple logistic regression including all variables with  $P < 0.2$  in  
9  
10 198 the univariate analysis showed that APACHE II score, pancreatitis, hematological diseases, gastric  
11  
12 199 tube feeding, and use of carbapenems were independent risk factors for acquiring CRAB intestinal  
13  
14 200 carriage during the ICU stay (Table 1). For APACHE II score, the model estimated that the  
15  
16 201 increase of the score by 1 point would lead to a 4% increase of the risk of acquiring CRAB  
17  
18 202 intestinal carriage in the ICU. Hosmer-Lemeshow test generated a 0.73 P value ( $\chi^2=5.25$ ,  $df=8$ ),  
19  
20  
21 203 suggesting adequate goodness-of-fit of the multiple logistic model.  
22  
23  
24 204

### 205 **CRAB intestinal carriage led to increased risks of subsequent CRAB infection**

206 During the study period, 112 of the 961 patients (11.65%, 95% CI 9.63%–13.68%) developed  
207 CRAB infections during the ICU stay. As for the infection type, lower respiratory tract infections  
208 were the most common ( $n=82$ , 73.21%), followed by bloodstream infections ( $n=9$ , 8.04%),  
209 surgical site infection ( $n=8$ , 7.14%), while 13 patients (11.61%) had infections at other sites.  
210 CRAB intestinal carriage was a risk factor for subsequent CRAB infection (HR 2.82, 95% CI  
211 1.94–4.09;  $P < 0.001$ ; Figure 2). The 90-day cumulative probability of no CRAB infection in  
212 patients with and without CRAB intestinal carriage was 69.5.0% (95% CI 43.5%–95.5%) and  
213 22.3% (95% CI 14.7%–29.9%), respectively ( $P < 0.001$ ). In the univariate analysis, CRAB  
214 intestinal carriage, APACHE II score, respiratory failure, liver dysfunction, hematological disease,  
215 pancreatitis, mechanical ventilation, placement of a central venous catheter, gastric tube feeding,  
216 and the use of carbapenems were identified as risk factors for subsequent CRAB infection. In the  
217 COX multivariate analysis, CRAB intestinal carriage was also found to be an independent risk

1  
2  
3 218 factor for subsequent CRAB infection (HR 2.24, 95% CI 1.48–3.39; Table 2). Omnibus test  
4  
5 219 showed a log likelihood difference of 79.82 and generated a less than 0.001 P value, suggesting  
6  
7 220 adequate goodness-of-fit of the COX model.  
8  
9

10 221 To evaluate whether CRAB intestinal carriage on admission and that acquired during the ICU  
11  
12 222 stay has different impact on subsequent CRAB, we performed subgroup analyses. In the subgroup  
13  
14 223 COX multivariate analysis, both CRAB intestinal carriage on admission and that acquired during  
15  
16 224 the ICU stay were an independent risk factor for subsequent CRAB infection (HR 3.42, 95% CI  
17  
18 225 1.88–6.22 for carriage on admission, Table S1 in the Supplementary file; HR 1.81, 95% CI 1.15–  
19  
20 226 2.86 for acquired carriage, Table S2). Omnibus test showed log likelihood difference of 66.06 and  
21  
22 227 74.18, respectively, and generated a less than 0.001 P value in the subgroup analysis, suggesting  
23  
24 228 adequate goodness-of-fit of the COX model.  
25  
26  
27

28 229 In addition to CRAB intestinal carriage, liver dysfunction (HR 2.33, 95% CI 1.30–4.17), and  
29  
30 230 the use of carbapenems (HR 2.21, 95% CI 1.40–3.49), were also identified as independent risk  
31  
32 231 factors of subsequent CRAB infection, while the use of cephalosporins (HR 0.45, 95% CI 0.28–  
33  
34 232 0.73) and cephamycins (HR 0.53, 95% CI 0.31–0.90) were protective factors (Table 2).  
35  
36  
37

38 233

## 39 234 **Discussion**

40  
41  
42 235 In this study, we found that in a region with a high CRAB prevalence, 6.87% of patients  
43  
44 236 (83.3% of those patients were transferred from other hospitals and 25.8% of them were stayed in  
45  
46 237 emergency ICU before admitted to the ICU) admitted to the ICU had CRAB intestinal carriage on  
47  
48 238 ICU admission, while an additional 11.97% of patients acquired CRAB intestinal carriage during  
49  
50 239 the ICU stay. The overall CRAB intestinal carriage rate was therefore 18.84%. This rate was  
51  
52 240 similar with a study conduct in Thailand, in which 5.45% (15/275) of patients had intestinal  
53  
54  
55  
56

1  
2  
3 241 carriage on ICU admission and 13.59% (28/206) patients acquired CRAB during their ICU  
4  
5 242 stay[15] and with another study in Italy[27], in which 18.92%(74/391) of patients carried CRAB  
6  
7 243 during ICU stay. However, the rate was significantly higher than those in Turkey (7.22%,  
8  
9 244 55/762)[28], Brazil (13.23%, 43/325)[29], USA (13.46%, 49/364)[30], and South Korea (15.06%,  
10  
11 245 168/1,115)[14], although other sites such as respiratory secretions were also screened in these  
12  
13 246 studies. This difference may be related to the local CRAB prevalence.  
14

15  
16  
17 247 Interestingly, we found that gastric tube feeding is a risk factor for both acquiring CRAB  
18  
19 248 intestinal carriage of CRAB in ICU, which is consistent with the findings of Kiddee et al[15], in  
20  
21 249 which tube feeding was also a high-risk factor for carriage of Gram-negative bacilli. This may  
22  
23 250 suggest an entry point of CRAB into human intestine. In this study, 73.0% (84/115) of patients  
24  
25 251 who acquired CRAB intestinal carriage using tube feeding. During the study, we performed a one-  
26  
27 252 day snapshot sampling of the feeding tubes (at the tube port), feeding contents and containers for  
28  
29 253 preparing feeding contents in the ICU and found the presence of CRAB in the tube feeding content  
30  
31 254 (24.0%, 6/25), at the tube port (33.3%, 3/9) and the tube feeding containers (7.1%, 1/14), indicating  
32  
33 255 contamination. This may be a key point for intervention in the ICU.  
34  
35  
36

37 256 We also found that patients with CRAB intestinal carriage were more likely to develop  
38  
39 257 subsequent CRAB infection than those without carriage. The survival curve in this study showed  
40  
41 258 that the cumulative infection rates in 90 days in patients with and without CRAB intestinal carriage  
42  
43 259 were 69.5% and 22.3%, respectively, similar to those reported in other studies[30]. However, the  
44  
45 260 HR was 2.24, which is much lower than those in previous studies[15,30,31]. This may be due to  
46  
47 261 the fact that healthcare associated infections in our ICU were mainly caused by lower respiratory  
48  
49 262 infections, which accounting for more than 70% of infections, while we only screened the  
50  
51 263 colonization of the intestines. Interestingly, we found that the use of cephalosporins and  
52  
53  
54  
55  
56  
57  
58  
59  
60

1  
2  
3 264 cephamycins led to lower risks of subsequent CRAB infection, while carbapenem use led to  
4  
5 265 increased risks. The association between CRAB and carbapenem use has been documented  
6  
7 266 before[30,32]. CRAB is usually resistant to cephalosporins and cephamycins. The use of  
8  
9  
10 267 cephalosporins and cephamycins may reflect the fact that patients did not receive carbapenems  
11  
12 268 and could therefore result in reduced selection pressure for CRAB.

14  
15 269 There are a few limitations in this study. First, this is a single center study and the findings  
16  
17 270 may not be generalized. Second, we used a modified CHROMagar *Acinetobacter* chromogenic  
18  
19 271 plate to screen CRAB from rectal swabs. Not all screened CRABs were confirmed using Vitek II  
20  
21 272 or other methods and there may be false negative results. Nonetheless, at the beginning of this  
22  
23 273 study, we confirmed that the 58 CRAB strains grown on the chromogenic medium were indeed all  
24  
25 274 *A. baumannii* by MALDI-TOF-MS and were all non-susceptible to imipenem or meropenem as  
26  
27 275 determined using the agar dilution method recommended by the Clinical and Laboratory Standards  
28  
29 276 Institute (CLSI)[20]. Third, we only collected the patients' rectal swabs for investigating CRAB  
30  
31 277 carriage. Studies have shown concurrent swab collection of skin, oropharyngeal, and airway  
32  
33 278 secretions in addition to rectal swabs, may improve sensitivity. However, the sample sizes in these  
34  
35 279 studies were small with only 21 and 34 cases, respectively[12,33]. Nonetheless, for practical  
36  
37 280 reasons and the aim to study CRAB intestinal carriage, we only collected rectal swabs. Fourth, due  
38  
39 281 to the poor sensitivity of rectal swabbing, a single negative test result could overlook carriers.  
40  
41 282 Moreover, no molecular strain typing was performed. Though reasonable, it was not proven that  
42  
43 283 CRAB isolated from intestinal colonization and site of nosocomial infection were identical. Last,  
44  
45 284 this study failed to collect for the first rectal swab specimen within 48 h of ICU admission from  
46  
47 285 23.8% of the patients. Nonetheless, 84.55% of these patients stayed in the ICU for less than 48 h.

54 286

1  
2  
3 287 In conclusion, some patients had CRAB intestinal carriage but more acquired during their ICU  
4  
5 288 stay. Severity of illness, acute pancreatitis, tube feeding, and use of carbapenems were independent  
6  
7 289 risk factors of the acquisition of CRAB intestinal carriage. Patients with CRAB intestinal carriage  
8  
9  
10 290 were more likely to have subsequent CRAB infection than those without.  
11

12 291

### 14 292 **Acknowledgments**

15  
16  
17 293 We would like acknowledge the physicians and allied health staff of the ICU and the Department  
18  
19 294 of Electronic Medical Record system of West China Hospital.  
20

21 295

### 23 296 **Author contributions**

24  
25  
26 297 Fu Qiao, Zhiyong Zong and Chuanmin Tao contributed to study conception and design. Shichao  
27  
28 298 Zhu and Yan Kang contributed to acquisition of data. Lin Cai collected rectal swabs and  
29  
30 299 transported to the laboratory. Fu Qiao, Wenzhi Huang and Shan Gao analyzed and interpreted data.  
31  
32 300 Li Wei inoculated rectal swabs onto plates cultured for 18-24h. Fu Qiao, Zhiyong Zong and  
33  
34 301 Chuanmin Tao drafted the manuscript. All authors revised the manuscript for important intellectual  
35  
36 302 content. All authors read and approved the final manuscript.  
37

38 303

### 40 304 **Funding**

41  
42  
43 305 The work was supported by grants from the National Natural Science Foundation of China (project  
44  
45 306 no. 81772233, 81661130159 and 81861138055), West China Hospital of Sichuan University  
46  
47 307 (1.3.5 project for disciplines of excellence, project no. ZYYC08006) and the Newton Advanced  
48  
49 308 Fellowship, Royal Society, UK (NA150363).  
50

51 309



### 310 **Competing interests**

311 The authors declare that they have no competing interests.

312

### 313 **Patient consent for publication**

314 Not required.

315

### 316 **Ethics approval**

317 This project was approved by the Ethics Committee of West China Hospital of Sichuan University.

318 We confirm that consents were not obtained from the patients. First, active screening is part of the

319 routine care for ICU patients in our hospital. In other words, no matter whether we analyzed the

320 data, the patients would receive the screening. Second, this is a retrospective study, in which we

321 looked back the patients' data and did not perform any interventions. Third, before we performed

322 this study, we have obtained ethical approval from the Ethical Committee and inform consents

323 were waived due to the retrospective nature of this study.

324

### 325 **Availability of data and materials**

326 The datasets during the current study available from the corresponding author on reasonable

327 request.

328

### 329 **References**

330 1 Wong D, Nielsen TB, Bonomo RA, *et al.* Clinical and Pathophysiological Overview of  
331 Acinetobacter Infections: a Century of Challenges. *Clin Microbiol Rev* 2017;**30**:409–47.  
332 doi:10.1128/CMR.00058-16

333 2 Wang J, Liu F, Tartari E, *et al.* The Prevalence of Healthcare-Associated Infections in  
334 Mainland China: A Systematic Review and Meta-analysis. *Infect Control Hosp Epidemiol*

- 1  
2  
3 335 2018;**39**:701–9. doi:10.1017/ice.2018.60
- 4 336 3 CDC. The biggest antibiotic-resistant threats in the U.S. Centers for Disease Control and  
5 337 Prevention. 2019.[https://www.cdc.gov/drugresistance/biggest\\_threats.html](https://www.cdc.gov/drugresistance/biggest_threats.html) (accessed 7 Aug 2019).
- 6 338 4 Global Priority List of Antibiotic-resistant Bacteria to Guide Research, Discovery, and  
7 339 Development of New Antibiotics. <http://apps.who.int/medicinedocs/en/m/abstract/Js23171en/>  
8 340 (accessed 7 Aug 2019).
- 9 341 5 European Centre for Disease Prevention and Control. Surveillance of antimicrobial resistance  
10 342 in Europe – Annual report of the European Antimicrobial Resistance Surveillance Network  
11 343 (EARS-Net) 2017. Stockholm: ECDC: 2018.
- 12 344 6 Asif M, Alvi IA, Rehman SU. Insight into *Acinetobacter baumannii*: pathogenesis, global  
13 345 resistance, mechanisms of resistance, treatment options, and alternative modalities. *Infect Drug*  
14 346 *Resist* 2018;**11**:1249–60. doi:10.2147/IDR.S166750
- 15 347 7 Guidelines for the prevention and control of carbapenem-resistant Enterobacteriaceae,  
16 348 *Acinetobacter baumannii* and *Pseudomonas aeruginosa* in health care facilities. WHO.  
17 349 2017.<http://www.who.int/infection-prevention/publications/guidelines-cre/en/> (accessed 7 Aug  
18 350 2019).
- 19 351 8 CHINET Data Cloud. <http://chinets.com/Chinet> (accessed 7 Aug 2019).
- 20 352 9 Lemos EV, de la Hoz FP, Alvis N, *et al.* Impact of carbapenem resistance on clinical and  
21 353 economic outcomes among patients with *Acinetobacter baumannii* infection in Colombia. *Clin*  
22 354 *Microbiol Infect* 2014;**20**:174–80. doi:10.1111/1469-0691.12251
- 23 355 10 Lemos EV, de la Hoz FP, Einarson TR, *et al.* Carbapenem resistance and mortality in patients  
24 356 with *Acinetobacter baumannii* infection: Systematic review and meta-analysis. *Clinical*  
25 357 *Microbiology and Infection* 2014;**20**:416–23. doi:10.1111/1469-0691.12363
- 26 358 11 Huang W, Qiao F, Wang Y, *et al.* Risk factors and prognosis of patients with bloodstream  
27 359 infection due to carbapenem-resistant *Acinetobacter baumannii*. *Chinese Journal of Infection*  
28 360 *Control* 2015;**14**:668–71.
- 29 361 12 Nutman A, Lerner A, Schwartz D, *et al.* Evaluation of carriage and environmental  
30 362 contamination by carbapenem-resistant *Acinetobacter baumannii*. *Clinical microbiology and*  
31 363 *infection : the official publication of the European Society of Clinical Microbiology and Infectious*  
32 364 *Diseases* 2016;**22**:949.e5-949.e7. doi:10.1016/j.cmi.2016.08.020
- 33 365 13 Cheng VCC, Chen JHK, So SYC, *et al.* Use of fluoroquinolones is the single most important  
34 366 risk factor for the high bacterial load in patients with nasal and gastrointestinal colonization by  
35 367 multidrug-resistant *Acinetobacter baumannii*. *European Journal of Clinical Microbiology &*  
36 368 *Infectious Diseases* 2015;**34**:2359–66. doi:10.1007/s10096-015-2489-4
- 37 369 14 An JH, Kim Y-H, Moon J-E, *et al.* Active surveillance for carbapenem-resistant *Acinetobacter*  
38 370 *baumannii* in a medical intensive care unit: Can it predict and reduce subsequent infections and  
39 371 the use of colistin? *Am J Infect Control* 2017;**45**:667–72. doi:10.1016/j.ajic.2017.01.016
- 40 372 15 Kiddee A, Assawatheptawee K, Na-udom A, *et al.* Risk Factors for Gastrointestinal  
41 373 Colonization and Acquisition of Carbapenem-Resistant Gram-Negative Bacteria among Patients  
42 374 in Intensive Care Units in Thailand. *Antimicrobial Agents and Chemotherapy* 2018;**62**.  
43 375 doi:10.1128/AAC.00341-18
- 44 376 16 Tischendorf J, de Avila RA, Safdar N. Risk of infection following colonization with  
45 377 carbapenem-resistant Enterobacteriaceae: A systematic review. *Am J Infect Control* 2016;**44**:539–  
46 378 43. doi:10.1016/j.ajic.2015.12.005
- 47 379 17 McConville TH, Sullivan SB, Gomez-Simmonds A, *et al.* Carbapenem-resistant  
48 380 Enterobacteriaceae colonization (CRE) and subsequent risk of infection and 90-day mortality in

- 1  
2  
3 381 critically ill patients, an observational study. *PLoS ONE* 2017;**12**:e0186195.  
4 382 doi:10.1371/journal.pone.0186195
- 5 383 18 Liu JY, Wu YH, Cai M, *et al.* Point-prevalence survey of healthcare-associated infections in  
6 384 Beijing, China: a survey and analysis in 2014. *J Hosp Infect* 2016;**93**:271–9.  
7 385 doi:10.1016/j.jhin.2016.03.019
- 8 386 19 Song W, Lee J, Kim T-K, *et al.* Modified CHROMagar Acinetobacter medium for direct  
9 387 detection of multidrug-resistant Acinetobacter strains in nasal and rectal swab samples. *Ann Lab*  
10 388 *Med* 2013;**33**:193–5. doi:10.3343/alm.2013.33.3.193
- 11 389 20 Wei L, Qiao F, Lin J, *et al.* Modified CHROMagar Acinetobacter chromogenic culture  
12 390 combined with MALDI-TOF-MS for rapid screening of carbapenem-resistant Acinetobacter  
13 391 baumannii from human gut. *Chin J Nosocomiol* 2018;**28**:2893–7.
- 14 392 21 Hosmer DW, Lemeshow S. *Applied Logistic Regression, Second Edition*. 2nd edition. New  
15 393 York, NY: John Wiley & Sons 2000.  
16 394 <https://onlinelibrary.wiley.com/doi/book/10.1002/0471722146>
- 17 395 22 Esterly JS, Griffith M, Qi C, *et al.* Impact of carbapenem resistance and receipt of active  
18 396 antimicrobial therapy on clinical outcomes of Acinetobacter baumannii bloodstream infections.  
19 397 *Antimicrob Agents Chemother* 2011;**55**:4844–9. doi:10.1128/AAC.01728-10
- 20 398 23 Hosmer DW, Lemeshow S. Goodness of fit tests for the multiple logistic regression model.  
21 399 *Communications in Statistics - Theory and Methods* 1980;**9**:1043–69.  
22 400 doi:10.1080/03610928008827941
- 23 401 24 Scrucca L, Santucci A, Aversa F. Competing risk analysis using R: an easy guide for  
24 402 clinicians. *Bone Marrow Transplant*. 2007;**40**:381–387. doi:10.1038/sj.bmt.1705727.
- 25 403 25 Therneau TM, Grambsch PM. *Modeling Survival Data: Extending the Cox Model*. 2000  
26 404 edition. Springer 2000.
- 27 405 26 Scrucca L, Santucci A, Aversa F. Regression modeling of competing risk using R: an in depth  
28 406 guide for clinicians. *Bone Marrow Transplant*. 2010;**45**:1388–1395. doi:10.1038/bmt.2009.359.
- 29 407 27 Mammina C, Bonura C, Vivoli AR, *et al.* Co-colonization with carbapenem-resistant  
30 408 *Klebsiella pneumoniae* and *Acinetobacter baumannii* in intensive care unit patients. *Scand J Infect*  
31 409 *Dis* 2013;**45**:629–34. doi:10.3109/00365548.2013.782614
- 32 410 28 Karaaslan A, Soysal A, Altinkanat Gelmez G, *et al.* Molecular characterization and risk factors  
33 411 for carbapenem-resistant Gram-negative bacilli colonization in children: emergence of NDM-  
34 412 producing *Acinetobacter baumannii* in a newborn intensive care unit in Turkey. *Journal of*  
35 413 *Hospital Infection* 2016;**92**:67–72. doi:10.1016/j.jhin.2015.09.011
- 36 414 29 DalBen MF, Basso M, Garcia CP, *et al.* Colonization pressure as a risk factor for colonization  
37 415 by multiresistant *Acinetobacter* spp and carbapenem-resistant *Pseudomonas aeruginosa* in an  
38 416 intensive care unit. *Clinics (Sao Paulo, Brazil)* 2013;**68**:1128–33. doi:10.6061/clinics/2013(08)11
- 39 417 30 Latibeaudiere R, Rosa R, Laowansiri P, *et al.* Surveillance cultures growing carbapenem-  
40 418 Resistant *Acinetobacter baumannii* predict the development of clinical infections: a retrospective  
41 419 cohort study. *Clin Infect Dis* 2015;**60**:415–22. doi:10.1093/cid/ciu847
- 42 420 31 Tseng W-P, Chen Y-C, Chen S-Y, *et al.* Risk for subsequent infection and mortality after  
43 421 hospitalization among patients with multidrug-resistant gram-negative bacteria colonization or  
44 422 infection. *Antimicrobial Resistance & Infection Control* 2018;**7**:93. doi:10.1186/s13756-018-  
45 423 0388-z
- 46 424 32 Blanco N, Harris AD, Rock C, *et al.* Risk Factors and Outcomes Associated with Multidrug-  
47 425 Resistant *Acinetobacter baumannii* upon Intensive Care Unit Admission. *Antimicrobial Agents*

1  
2  
3 426 *and Chemotherapy* 2017;**62**. doi:10.1128/AAC.01631-17  
4 427 33 Marchaim D, Navon-Venezia S, Schwartz D, *et al.* Surveillance cultures and duration of  
5 428 carriage of multidrug-resistant *Acinetobacter baumannii*. *J Clin Microbiol* 2007;**45**:1551–5.  
6 429 doi:10.1128/JCM.02424-06  
7  
8  
9 430  
10  
11 431  
12  
13  
14  
15  
16  
17  
18  
19  
20  
21  
22  
23  
24  
25  
26  
27  
28  
29  
30  
31  
32  
33  
34  
35  
36  
37  
38  
39  
40  
41  
42  
43  
44  
45  
46  
47  
48  
49  
50  
51  
52  
53  
54  
55  
56  
57  
58  
59  
60

For peer review only

1  
2  
3 **432 Figure legends**  
4

5  
6 **433 Figure 1.** Patient selection flow algorithm  
7

8 **434 Figure 2.** Survival curves of patients with and without CRAB intestinal carriage  
9  
10  
11  
12  
13  
14  
15  
16  
17  
18  
19  
20  
21  
22  
23  
24  
25  
26  
27  
28  
29  
30  
31  
32  
33  
34  
35  
36  
37  
38  
39  
40  
41  
42  
43  
44  
45  
46  
47  
48  
49  
50  
51  
52  
53  
54  
55  
56  
57  
58  
59  
60

For peer review only

Table 1 Risk factors for the acquisition of CRAB intestinal carriage during the ICU stay

| Characteristics             | Patients with acquiring CRAB intestinal carriage |              | Univariate analysis |              | Multivariate analysis |   |
|-----------------------------|--------------------------------------------------|--------------|---------------------|--------------|-----------------------|---|
|                             | Yes (n=115)                                      | No (n=780)   | OR (95% CI)         | P            | OR (95% CI)           | P |
| <b>Demographics</b>         |                                                  |              |                     |              |                       |   |
| Sex, male                   | 71 (61.74%)                                      | 502 (64.36%) | 1.12 (0.75–1.68)    | 0.59         |                       |   |
| Ethnicity, Han Chinese      | 108 (93.91%)                                     | 712 (91.28%) | 1.47 (0.66–3.29)    | 0.34         |                       |   |
| Age (median)                | 51 (40–70)                                       | 56 (45–68)   | /                   | 0.21         |                       |   |
| <b>Underlying disease</b>   |                                                  |              |                     |              |                       |   |
| Myocardial infarction       | 1 (0.87%)                                        | 4 (0.51%)    | 1.7 (0.19–15.36)    | 0.50         |                       |   |
| Peripheral vascular disease | 11 (9.57%)                                       | 62 (7.95%)   | 1.22 (0.62–2.40)    | 0.55         |                       |   |
| Cerebrovascular disease     | 4 (3.48%)                                        | 36 (4.62%)   | 0.74 (0.26–2.13)    | 0.58         |                       |   |
| Dementia                    | 1 (0.87%)                                        | 0 (0%)       | /                   | 0.13         |                       |   |
| Connective tissue disease   | 1 (0.87%)                                        | 12 (1.54%)   | 0.56 (0.07–4.36)    | 0.89         |                       |   |
| Peptic Ulcer                | 5 (4.35%)                                        | 25 (3.21%)   | 1.37 (0.51–3.66)    | 0.72         |                       |   |
| Hemiplegia                  | 0 (0%)                                           | 1 (0.13%)    | /                   | 1.00         |                       |   |
| Hypertension                | 36 (31.30%)                                      | 180 (23.08%) | 1.52 (0.99–2.33)    | 0.05         |                       |   |
| Tuberculosis                | 1 (0.87%)                                        | 12 (1.54%)   | 0.56 (0.07–4.36)    | 0.89         |                       |   |
| COPD                        | 10 (8.70%)                                       | 54 (6.92%)   | 1.28 (0.63–2.59)    | 0.49         |                       |   |
| Respiratory failure         | 40 (34.78%)                                      | 163 (20.90%) | 2.02 (1.33–3.07)    | <b>0.001</b> |                       |   |

|                              |                    |                     |                         |                  |                         |                  |
|------------------------------|--------------------|---------------------|-------------------------|------------------|-------------------------|------------------|
| Kidney failure               | 11 (9.57%)         | 31 (3.97%)          | 2.56 (1.25–5.24)        | <b>0.01</b>      |                         |                  |
| Heart failure                | 7 (6.09%)          | 19 (2.44%)          | 2.99 (1.28–7.01)        | 0.06             |                         |                  |
| Diabetes                     | 21 (18.26%)        | 102 (13.08%)        | 1.48 (0.89–2.49)        | 0.13             |                         |                  |
| Liver dysfunction            | 5 (4.35%)          | 37 (4.74%)          | 0.91 (0.35–2.37)        | 0.85             |                         |                  |
| <b>Hematological disease</b> | <b>71 (61.74%)</b> | <b>268 (34.36%)</b> | <b>3.08 (2.06–4.62)</b> | <b>&lt;0.001</b> | <b>2.26 (1.42–3.58)</b> | <b>0.001</b>     |
| <b>Pancreatitis</b>          | <b>35 (30.43%)</b> | <b>77 (9.87%)</b>   | <b>3.99 (2.52–6.34)</b> | <b>&lt;0.001</b> | <b>2.16 (1.28–3.67)</b> | <b>0.004</b>     |
| Medical operation            |                    |                     |                         |                  |                         |                  |
| <b>Surgery</b>               | <b>82 (71.30%)</b> | <b>645 (82.69%)</b> | <b>0.52 (0.33–0.81)</b> | <b>0.004</b>     | <b>0.40 (0.24–0.68)</b> | <b>0.001</b>     |
| CVC                          | 78 (67.83%)        | 424 (54.36%)        | 1.77 (1.17–2.68)        | <b>0.01</b>      |                         |                  |
| Ventilator                   | 101 (87.83%)       | 666 (85.38%)        | 1.23 (0.68–2.23)        | 0.49             |                         |                  |
| Indwelling catheter          | 110 (95.65%)       | 742 (95.13%)        | 1.13 (0.43–2.92)        | 0.81             |                         |                  |
| <b>Tube feeding</b>          | <b>84 (73.04%)</b> | <b>280 (35.90%)</b> | <b>4.84 (3.13–7.49)</b> | <b>&lt;0.001</b> | <b>3.35 (2.03–5.51)</b> | <b>&lt;0.001</b> |
| Nebulizer fiberoptic         | 73 (63.48%)        | 368 (47.18%)        | 1.95 (1.30–2.92)        | <b>0.001</b>     |                         |                  |
| Bronchoscope                 | 1 (0.87%)          | 21 (2.69%)          | 0.32 (0.04–2.38)        | 0.39             |                         |                  |
| Antimicrobial use            |                    |                     |                         |                  |                         |                  |
| <b>Cephalosporin</b>         | <b>35 (30.43%)</b> | <b>312 (40.00%)</b> | <b>0.66 (0.43–1.00)</b> | <b>0.05</b>      | <b>0.59 (0.37–0.95)</b> | <b>0.03</b>      |
| Vancomycin                   | 13 (11.30%)        | 32 (4.10%)          | 2.98 (1.51–5.86)        | <b>0.001</b>     |                         |                  |
| Aminoglycosides              | 12 (10.43%)        | 31 (3.97%)          | 2.81 (1.40–5.65)        | <b>0.002</b>     |                         |                  |
| <b>Carbapenems</b>           | <b>82 (71.30%)</b> | <b>295 (37.82%)</b> | <b>4.09 (2.66–6.27)</b> | <b>&lt;0.001</b> | <b>1.84 (1.11–3.07)</b> | <b>0.02</b>      |

1  
2  
3  
4  
5  
6  
7  
8  
9  
10  
11  
12  
13  
14  
15  
16  
17  
18  
19  
20  
21  
22  
23  
24  
25  
26  
27  
28  
29  
30  
31  
32  
33  
34  
35  
36  
37  
38  
39  
40  
41  
42  
43  
44  
45  
46  
47

|                                       |                     |                   |                  |                  |                              |
|---------------------------------------|---------------------|-------------------|------------------|------------------|------------------------------|
| Fluoroquinolones                      | 26 (22.61%)         | 137 (17.56%)      | 1.37 (0.85–2.20) | 0.19             |                              |
| Antifungal agents                     | 49 (42.61%)         | 138 (17.69%)      | 3.45 (2.29–5.22) | <b>&lt;0.001</b> |                              |
| Cephamycins                           | 16 (13.91%)         | 253 (32.44%)      | 0.34 (0.19–0.58) | <b>&lt;0.001</b> |                              |
| Lincomycin                            | 3 (2.61%)           | 61 (7.82%)        | 0.32 (0.10–1.02) | <b>0.04</b>      |                              |
| Tigecycline                           | 19 (16.52%)         | 69 (8.85%)        | 2.04 (1.18–3.54) | <b>0.01</b>      |                              |
| <b>APACHE II</b>                      | <b>21.5 (17–26)</b> | <b>17 (12–22)</b> | /                | <b>&lt;0.001</b> | <b>1.04 (1.01–1.07) 0.01</b> |
| Charlson score                        | 2 (1–5)             | 3 (2–4)           | /                | 0.06             |                              |
| Sharing room with other patients with | 20 (17.39%)         | 153 (19.62%)      | 0.86 (0.52–1.44) | 0.57             |                              |
| CRAB intestinal carriage              |                     |                   |                  |                  |                              |

COPD, chronic obstructive pulmonary disease. CVC, central venous catheter.

Variables with P < 0.05 in the multiple logistic analysis are highlighted in bold.



Table 2 Variables associated with developing subsequent CRAB infection during the ICU stay using sub-distribution hazard model

| Item                            | Subsequent CRAB infection during the ICU stay |                     | Univariate analysis    |        | Multivariate analysis   |                  |
|---------------------------------|-----------------------------------------------|---------------------|------------------------|--------|-------------------------|------------------|
|                                 | Yes (n=112)                                   | No (n=849)          | SDHR (95% CI)          | P      | SDHR (95% CI)           | P                |
| <b>CRAB intestinal carriage</b> | <b>51 (45.54%)</b>                            | <b>130 (15.31%)</b> | 2.82(1.94-4.09)        | <0.001 | <b>2.24 (1.48–3.39)</b> | <b>&lt;0.001</b> |
| Demographics                    |                                               |                     |                        |        |                         |                  |
| Sex, male                       | 72 (64.29%)                                   | 548 (64.55%)        | 1.03(0.70-1.52)        | 0.87   |                         |                  |
| Ethnicity, Han Chinese          | 106 (94.64%)                                  | 774 (91.38%)        | 1.62(0.70-3.74)        | 0.26   |                         |                  |
| Age (median)                    | 53 (42–67)                                    | 55 (44–68)          | 1.00(0.99-1.01)        | 0.71   |                         |                  |
| APACHE II                       | 21 (17–26)                                    | 17 (12–22)          | 1.05(1.03-1.07)        | <0.001 |                         |                  |
| Charlson score                  | 3 (1–5)                                       | 3 (1.5–4)           | 0.98(0.88-1.08)        | 0.66   |                         |                  |
| Underlying disease              |                                               |                     |                        |        |                         |                  |
| Peripheral vascular disease     | 13 (11.61%)                                   | 66 (7.77%)          | 1.30(0.72-2.34)        | 0.38   |                         |                  |
| Cerebrovascular disease         | 4 (3.57%)                                     | 36 (4.24%)          | 0.89(0.34-2.33)        | 0.81   |                         |                  |
| Connective tissue disease       | 1 (0.89%)                                     | 12 (1.41%)          | 0.60(0.08-4.48)        | 0.62   |                         |                  |
| Peptic ulcer                    | 4 (3.57%)                                     | 27 (3.18%)          | 1.11(0.46-2.71)        | 0.81   |                         |                  |
| Hypertension                    | 28 (25.00%)                                   | 199 (23.44%)        | 1.02(0.67-1.57)        | 0.92   |                         |                  |
| Tuberculosis                    | 2 (1.79%)                                     | 12 (1.41%)          | 1.22(0.28-5.27)        | 0.79   |                         |                  |
| COPD                            | 11 (9.82%)                                    | 55 (6.48%)          | 1.35(0.70-2.59)        | 0.37   |                         |                  |
| Respiratory failure             | 47 (41.96%)                                   | 170 (20.02%)        | 2.02(1.38-2.96)        | <0.001 |                         |                  |
| Kidney failure                  | 9 (8.04%)                                     | 42 (4.95%)          | 1.42(0.73-2.75)        | 0.30   |                         |                  |
| Heart failure                   | 4 (3.57%)                                     | 27 (3.18%)          | 1.22(0.48-3.11)        | 0.68   |                         |                  |
| Diabetes                        | 15 (13.39%)                                   | 118 (13.90%)        | 0.87(0.50-1.49)        | 0.61   |                         |                  |
| <b>Liver dysfunction</b>        | <b>17 (15.18%)</b>                            | <b>34 (4.00%)</b>   | <b>3.15(1.86-5.35)</b> | <0.001 | <b>2.33 (1.30–4.17)</b> | <b>0.005</b>     |
| Hematological disease           | 60 (53.57%)                                   | 314 (36.98%)        | 1.61(1.11-2.34)        | 0.012  |                         |                  |
| Pancreatitis                    | 29 (25.89%)                                   | 107 (12.60%)        | 1.94(1.29-2.92)        | 0.002  |                         |                  |
| Medical operation               |                                               |                     |                        |        |                         |                  |

1  
2  
3  
4  
5  
6  
7  
8  
9  
10  
11  
12  
13  
14  
15  
16  
17  
18  
19  
20  
21  
22  
23  
24  
25  
26  
27  
28  
29  
30  
31  
32  
33  
34  
35  
36  
37  
38  
39  
40  
41  
42  
43  
44  
45  
46  
47

|                      |                     |                     |                        |        |                         |                  |
|----------------------|---------------------|---------------------|------------------------|--------|-------------------------|------------------|
| Surgery              | 83 (74.11%)         | 711 (83.75%)        | 0.70(0.45-1.07)        | 0.099  |                         |                  |
| CVC                  | 83 (74.11%)         | 470 (55.36%)        | 1.85(1.21-2.81)        | 0.004  |                         |                  |
| <b>Ventilator</b>    | <b>103 (91.96%)</b> | <b>719 (84.69%)</b> | <b>2.02(1.04-3.93)</b> | 0.038  |                         |                  |
| Indwelling catheter  | 109 (97.32%)        | 808 (95.17%)        | 1.84(0.62-5.52)        | 0.27   |                         |                  |
| Tube feeding         | 80 (71.43%)         | 332 (39.10%)        | 2.44(1.62-3.69)        | <0.001 |                         |                  |
| Nebulizer fiberoptic | 72 (64.29%)         | 413 (48.65%)        | 1.18(0.80-1.73)        | 0.40   |                         |                  |
| Bronchoscope         | 5 (4.46%)           | 18 (2.12%)          | 1.44(0.59-3.52)        | 0.43   |                         |                  |
| Antimicrobial use    |                     |                     |                        |        |                         |                  |
| <b>Cephalosporin</b> | <b>20 (17.86%)</b>  | <b>236 (27.80%)</b> | <b>0.50(0.31-0.81)</b> | 0.005  | <b>0.45 (0.28–0.73)</b> | <b>0.001</b>     |
| Vancomycin           | 3 (2.68%)           | 35 (4.12%)          | 0.68(0.21-2.15)        | 0.51   |                         |                  |
| Aminoglycosides      | 1 (0.89%)           | 23 (2.71%)          | 0.24(0.03-1.71)        | 0.15   |                         |                  |
| <b>Carbapenems</b>   | <b>82 (73.21%)</b>  | <b>351 (41.34%)</b> | <b>2.84(1.87-4.32)</b> | <0.001 | <b>2.21(1.40–3.49)</b>  | <b>&lt;0.001</b> |
| Fluoroquinolones     | 32 (28.57%)         | 154 (18.14%)        | 1.04(0.69-1.56)        | 0.84   |                         |                  |
| Antifungal agents    | 23 (20.54%)         | 157 (18.49%)        | 0.96(0.61-1.5)         | 0.85   |                         |                  |
| <b>Cephamycins</b>   | <b>16 (14.29%)</b>  | <b>196 (23.09%)</b> | <b>0.51(0.30-0.86)</b> | 0.011  | <b>0.53 (0.31–0.90)</b> | <b>0.018</b>     |
| Lincomycin           | 5 (4.46%)           | 35 (4.12%)          | 1.01(0.41-2.48)        | 0.99   |                         |                  |
| Tigecycline          | 13 (11.61%)         | 65 (7.66%)          | 1.33(0.76-2.34)        | 0.32   |                         |                  |

COPD, chronic obstructive pulmonary disease. CVC, central venous catheter.

Variables with P < 0.05 in the multivariate COX analysis are highlighted in bold.

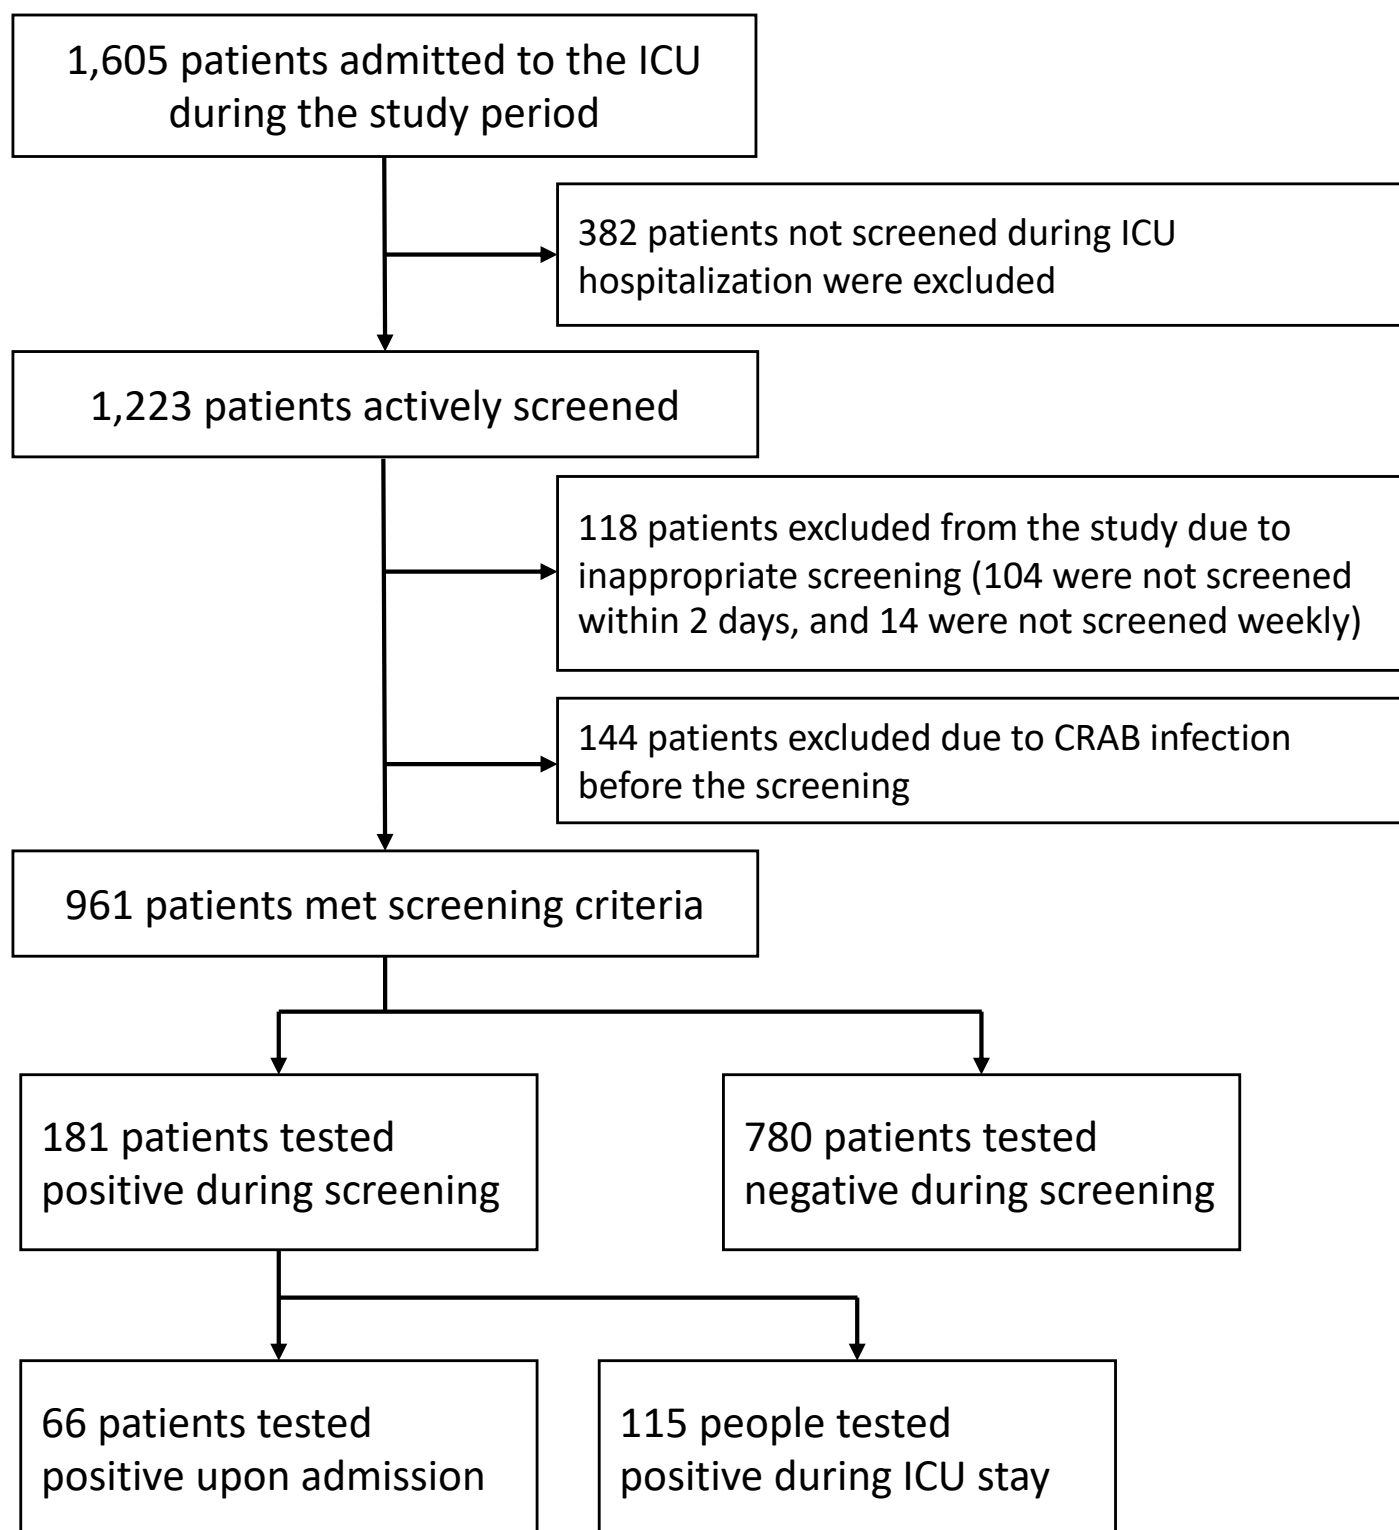

Figure 1. Patient selection flow algorithm

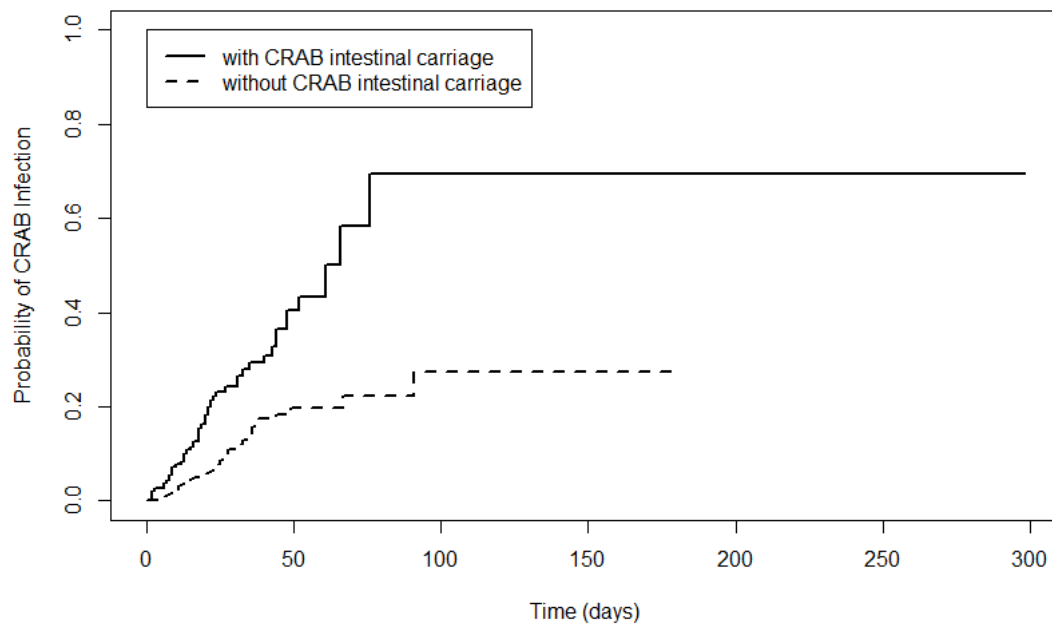

**Figure 2.** Survival curves of patients with and without CRAB intestinal carriage

(cumulative probability of CRAB infection). Death in the ICU is considered as a competing event, not drawn in the figure. The solid line represents patients with CRAB intestinal carriage, while the dashed line represents those without. In patients with CRAB intestinal carriage, Day 0 corresponds to the day of the first positive rectal sample. While in patients without CRAB intestinal carriage, Day 0 corresponds to the day of the first rectal sample.

## Supplementary files

Table S1 Variables associated with developing subsequent CRAB infection during the ICU stay using sub-distribution hazard model (exposed group was those patients with intestinal carriage on ICU admission)

| Item                            | Subsequent CRAB infection during the ICU stay |                   | Univariate analysis    |                  | Multivariate analysis   |                  |
|---------------------------------|-----------------------------------------------|-------------------|------------------------|------------------|-------------------------|------------------|
|                                 | Yes (n=80)                                    | No (n=766)        | <i>SDHR (95% CI)</i>   | <i>P</i>         | <i>SDHR (95% CI)</i>    | <i>P</i>         |
| <b>CRAB intestinal carriage</b> | <b>19 (23.75%)</b>                            | <b>47 (6.14%)</b> | 3.78(2.20-6.49)        | <b>&lt;0.001</b> | <b>3.42 (1.88-6.22)</b> | <b>&lt;0.001</b> |
| Demographics                    |                                               |                   |                        |                  |                         |                  |
| Sex, male                       | 50 (62.50%)                                   | 499 (65.14%)      | 1.15(0.73-1.80)        | 0.55             |                         |                  |
| Ethnicity, Han Chinese          | 77 (96.25%)                                   | 697 (90.99%)      | 2.54(0.78-8.24)        | 0.12             |                         |                  |
| Age (median)                    | 54 (42-68)                                    | 55 (44-68)        | 1.00(0.99-1.02)        | 0.85             |                         |                  |
| <b>APACHE II</b>                | <b>20 (15-26)</b>                             | <b>17 (12-22)</b> | <b>1.06(1.03-1.08)</b> | <b>&lt;0.001</b> | <b>1.03 (1.00-1.05)</b> | <b>0.045</b>     |
| Charlson score                  | 3 (1-5)                                       | 3 (2-4)           | 1.00(0.88-1.13)        | 1.00             |                         |                  |
| Underlying disease              |                                               |                   |                        |                  |                         |                  |
| Peripheral vascular disease     | 11 (13.75%)                                   | 57 (7.44%)        | 1.62(0.85-3.10)        | 0.14             |                         |                  |
| Cerebrovascular disease         | 3 (3.75%)                                     | 33 (4.31%)        | 0.87(0.29-2.66)        | 0.81             |                         |                  |
| Connective tissue disease       | 1 (1.25%)                                     | 11 (1.44%)        | 0.78(0.11-5.73)        | 0.80             |                         |                  |
| Peptic ulcer                    | 3 (3.75%)                                     | 23 (3.00%)        | 1.19(0.41-3.46)        | 0.74             |                         |                  |
| Hypertension                    | 18 (22.50%)                                   | 173 (22.58%)      | 0.97(0.58-1.64)        | 0.91             |                         |                  |
| Tuberculosis                    | 1 (1.25%)                                     | 12 (1.57%)        | 0.72(0.10-5.37)        | 0.75             |                         |                  |
| <b>COPD</b>                     | <b>11 (13.75%)</b>                            | <b>45 (5.87%)</b> | <b>2.21(1.15-4.24)</b> | <b>0.017</b>     | <b>2.71 (1.40-5.24)</b> | <b>0.003</b>     |
| Respiratory failure             | 34 (42.50%)                                   | 143 (18.67%)      | 2.38(1.52-3.72)        | <b>&lt;0.001</b> |                         |                  |
| Kidney failure                  | 5 (6.25%)                                     | 35 (4.57%)        | 1.13(0.474-2.7)        | 0.78             |                         |                  |
| Heart failure                   | 2 (2.50%)                                     | 21 (2.74%)        | 1.05(0.28-3.92)        | 0.95             |                         |                  |

|    |                       |                    |                     |                        |                  |                         |                  |
|----|-----------------------|--------------------|---------------------|------------------------|------------------|-------------------------|------------------|
| 1  |                       |                    |                     |                        |                  |                         |                  |
| 2  |                       |                    |                     |                        |                  |                         |                  |
| 3  |                       |                    |                     |                        |                  |                         |                  |
| 4  |                       |                    |                     |                        |                  |                         |                  |
| 5  | Diabetes              | 11 (13.75%)        | 101 (13.19%)        | 1.03(0.54-1.98)        | 0.92             |                         |                  |
| 6  | Liver dysfunction     | <b>14 (17.50%)</b> | <b>32 (4.18%)</b>   | <b>3.59(2.00-6.45)</b> | <b>&lt;0.001</b> | <b>2.35 (1.30-4.25)</b> | <b>0.005</b>     |
| 7  | Hematological disease | 42 (52.50%)        | 261 (34.07%)        | 1.84(1.19-2.85)        | <b>0.006</b>     |                         |                  |
| 8  | Pancreatitis          | 17 (21.25%)        | 84 (10.97%)         | 1.91(1.13-3.22)        | <b>0.016</b>     |                         |                  |
| 9  |                       |                    |                     |                        |                  |                         |                  |
| 10 | Medical operation     |                    |                     |                        |                  |                         |                  |
| 11 | Surgery               | 62 (77.50%)        | 638 (83.29%)        | 0.83(0.49-1.42)        | 0.50             |                         |                  |
| 12 | CVC                   | 61 (76.25%)        | 414 (54.05%)        | 2.23(1.33-3.74)        | <b>0.002</b>     |                         |                  |
| 13 | Ventilator            | 72 (90.00%)        | 648 (84.60%)        | 1.62(0.80-3.25)        | 0.18             |                         |                  |
| 14 | Indwelling catheter   | 78 (97.50%)        | 729 (95.17%)        | 1.91(0.53-6.94)        | 0.32             |                         |                  |
| 15 | Tube feeding          | 54 (67.50%)        | 265 (34.60%)        | 2.71(1.69-4.34)        | <b>&lt;0.001</b> |                         |                  |
| 16 | Nebulizer fiberoptic  | 51 (63.75%)        | 349 (45.56%)        | 1.35(0.86-2.12)        | 0.19             |                         |                  |
| 17 | Bronchoscope          | 5 (6.25%)          | 17 (2.22%)          | 1.85(0.77-4.46)        | 0.17             |                         |                  |
| 18 |                       |                    |                     |                        |                  |                         |                  |
| 19 | Antimicrobial use     |                    |                     |                        |                  |                         |                  |
| 20 | Cephalosporin         | <b>15 (18.75%)</b> | <b>210 (27.42%)</b> | <b>0.54(0.31-0.95)</b> | <b>0.032</b>     | <b>0.43(0.24-0.78)</b>  | <b>0.006</b>     |
| 21 | Vancomycin            | 2 (2.50%)          | 28 (3.66%)          | 0.70(0.16-2.98)        | 0.63             |                         |                  |
| 22 | Aminoglycosides       | 1 (1.25%)          | 15 (1.96%)          | 0.50(0.07-3.52)        | 0.48             |                         |                  |
| 23 | Carbapenems           | <b>58 (72.50%)</b> | <b>284 (37.08%)</b> | <b>3.57(2.18-5.85)</b> | <b>&lt;0.001</b> | <b>2.61(1.53-4.46)</b>  | <b>&lt;0.001</b> |
| 24 | Fluoroquinolones      | 21 (26.25%)        | 127 (16.58%)        | 1.07(0.66-1.74)        | 0.79             |                         |                  |
| 25 | Antifungal agents     | 17 (21.25%)        | 123 (16.06%)        | 1.26(0.74-2.12)        | 0.39             |                         |                  |
| 26 | Cephamecins           | 12 (15.00%)        | 179 (23.37%)        | 0.52(0.28-0.96)        | <b>0.036</b>     |                         |                  |
| 27 | Lincomycin            | 3 (3.75%)          | 32 (4.18%)          | 0.84(0.26-2.68)        | 0.76             |                         |                  |
| 28 | Tigecycline           | 8 (10.00%)         | 53 (6.92%)          | 1.36(0.67-2.76)        | 0.39             |                         |                  |

COPD, chronic obstructive pulmonary disease. CVC, central venous catheter.

Variables with P < 0.05 in the multivariate COX analysis are highlighted in bold.

Table S2. Variables associated with developing subsequent CRAB infection during the ICU stay using sub-distribution hazard model (exposed group was those patients with ICU acquisition of CRAB intestinal carriage)

| Item                        | Subsequent CRAB infection during the ICU stay |                     | Univariate analysis    |                  | Multivariate analysis   |              |
|-----------------------------|-----------------------------------------------|---------------------|------------------------|------------------|-------------------------|--------------|
|                             | Yes (n=93)                                    | No (n=802)          | <i>SDHR (95% CI)</i>   | <i>P</i>         | <i>SDHR (95% CI)</i>    | <i>P</i>     |
| CRAB intestinal carriage    | <b>32 (34.41%)</b>                            | <b>83 (10.35%)</b>  | <b>2.35(1.56-3.55)</b> | <b>&lt;0.001</b> | <b>1.81 (1.15-2.86)</b> | <b>0.011</b> |
| Demographics                |                                               |                     |                        |                  |                         |              |
| Sex, male                   | 60 (64.52%)                                   | 513 (63.97%)        | 1.01(0.66-1.55)        | 0.95             |                         |              |
| Ethnicity, Han Chinese      | 87 (93.55%)                                   | 731 (91.15%)        | 1.32(0.56-3.08)        | 0.52             |                         |              |
| Age (median)                | 54 (44-68)                                    | 55 (45-68)          | 1.00(0.99-1.01)        | 0.70             |                         |              |
| APACHE II                   | 21 (18-26)                                    | 17 (12-22)          | 1.05(1.03-1.07)        | <0.001           |                         |              |
| Charlson score              | 3 (1-5)                                       | 3 (2-4)             | 1.01(0.91-1.13)        | 0.80             |                         |              |
| Underlying disease          |                                               |                     |                        |                  |                         |              |
| Peripheral vascular disease | 11 (11.83%)                                   | 62 (7.73%)          | 1.34(0.71-2.53)        | 0.37             |                         |              |
| Cerebrovascular disease     | 4 (4.30%)                                     | 36 (4.49%)          | 1.03(0.39-2.73)        | 0.96             |                         |              |
| Connective tissue disease   | 1 (1.08%)                                     | 12 (1.50%)          | 0.68(0.09-5.07)        | 0.70             |                         |              |
| Peptic ulcer                | 4 (4.30%)                                     | 26 (3.24%)          | 1.39(0.58-3.33)        | 0.46             |                         |              |
| Hypertension                | 25 (26.88%)                                   | 191 (23.82%)        | 1.10(0.69-1.74)        | 0.70             |                         |              |
| Tuberculosis                | 2 (2.15%)                                     | 11 (1.37%)          | 1.41(0.32-6.29)        | 0.65             |                         |              |
| COPD                        | 10 (10.75%)                                   | 54 (6.73%)          | 1.37(0.69-2.75)        | 0.37             |                         |              |
| Respiratory failure         | <b>44 (47.31%)</b>                            | <b>159 (19.83%)</b> | <b>2.42(1.59-3.69)</b> | <b>&lt;0.001</b> | <b>1.84 (1.17-2.90)</b> | <b>0.009</b> |
| Kidney failure              | 7 (7.53%)                                     | 35 (4.36%)          | 1.56(0.75-3.28)        | 0.24             |                         |              |

|    |                       |                    |                     |                        |                  |                         |              |
|----|-----------------------|--------------------|---------------------|------------------------|------------------|-------------------------|--------------|
| 1  |                       |                    |                     |                        |                  |                         |              |
| 2  |                       |                    |                     |                        |                  |                         |              |
| 3  |                       |                    |                     |                        |                  |                         |              |
| 4  |                       |                    |                     |                        |                  |                         |              |
| 5  | Heart failure         | 3 (3.23%)          | 24 (2.99%)          | 1.34(0.47-3.82)        | 0.58             |                         |              |
| 6  | Diabetes              | 11 (11.83%)        | 112 (13.97%)        | 0.75(0.40-1.39)        | 0.36             |                         |              |
| 7  | Liver dysfunction     | <b>13 (13.98%)</b> | <b>29 (3.62%)</b>   | <b>3.18(1.74-5.81)</b> | <b>&lt;0.001</b> | <b>2.13(1.05-4.32)</b>  | <b>0.037</b> |
| 8  | Hematological disease | 49 (52.69%)        | 290 (36.16%)        | 1.60(1.06-2.40)        | 0.025            |                         |              |
| 9  | Pancreatitis          | 20 (21.51%)        | 92 (11.47%)         | 1.71(1.06-2.76)        | 0.028            |                         |              |
| 10 |                       |                    |                     |                        |                  |                         |              |
| 11 |                       |                    |                     |                        |                  |                         |              |
| 12 | Medical operation     |                    |                     |                        |                  |                         |              |
| 13 | Surgery               | 70 (75.27%)        | 666 (83.04%)        | 0.78(0.49-1.27)        | 0.32             |                         |              |
| 14 | CVC                   | 68 (73.12%)        | 434 (54.11%)        | 1.82(1.15-2.88)        | 0.011            |                         |              |
| 15 | Ventilator            | 85 (91.40%)        | 683 (85.16%)        | 1.83(0.89-3.76)        | 0.10             |                         |              |
| 16 | Indwelling catheter   | 91 (97.85%)        | 761 (94.89%)        | 2.37(0.58-9.63)        | 0.23             |                         |              |
| 17 | Tube feeding          | 67 (72.04%)        | 300 (37.41%)        | 2.64(1.67-4.18)        | <0.001           |                         |              |
| 18 | Nebulizer fiberoptic  | 64 (68.82%)        | 388 (48.38%)        | 1.42(0.92-2.20)        | 0.11             |                         |              |
| 19 | Bronchoscope          | 5 (5.38%)          | 18 (2.24%)          | 1.60(0.64-3.99)        | 0.31             |                         |              |
| 20 |                       |                    |                     |                        |                  |                         |              |
| 21 |                       |                    |                     |                        |                  |                         |              |
| 22 | Antimicrobial use     |                    |                     |                        |                  |                         |              |
| 23 |                       |                    |                     |                        |                  |                         |              |
| 24 | Cephalosporin         | <b>18 (19.35%)</b> | <b>213 (26.56%)</b> | <b>0.60(0.36-1.00)</b> | <b>0.051</b>     | <b>0.59(0.35-1.00)</b>  | <b>0.048</b> |
| 25 | Vancomycin            | 2 (2.15%)          | 33 (4.11%)          | 0.53(0.13-2.15)        | 0.38             |                         |              |
| 26 | Carbapenems           | <b>68 (73.12%)</b> | <b>319 (39.78%)</b> | <b>2.92(1.84-4.64)</b> | <b>&lt;0.001</b> | <b>2.11 (1.27-3.50)</b> | <b>0.004</b> |
| 27 | Fluoroquinolones      | 28 (30.11%)        | 144 (17.96%)        | 1.11(0.71-1.72)        | 0.65             |                         |              |
| 28 | Antifungal agents     | 16 (17.20%)        | 141 (17.58%)        | 0.82(0.48-1.39)        | 0.46             |                         |              |
| 29 | Cephamycins           | 15 (16.13%)        | 187 (23.32%)        | 0.56(0.33-0.98)        | 0.042            |                         |              |
| 30 | Lincomycin            | 4 (4.30%)          | 34 (4.24%)          | 0.90(0.34-2.44)        | 0.84             |                         |              |
| 31 | Tigecycline           | 7 (7.53%)          | 57 (7.11%)          | 0.91(0.43-1.96)        | 0.82             |                         |              |
| 32 |                       |                    |                     |                        |                  |                         |              |
| 33 |                       |                    |                     |                        |                  |                         |              |
| 34 |                       |                    |                     |                        |                  |                         |              |

COPD, chronic obstructive pulmonary disease. CVC, central venous catheter.

Variables with P < 0.05 in the multivariate COX analysis are highlighted in bold.



# Reporting checklist for cohort study.

Based on the STROBE cohort guidelines.

## Instructions to authors

Complete this checklist by entering the page numbers from your manuscript where readers will find each of the items listed below.

Your article may not currently address all the items on the checklist. Please modify your text to include the missing information. If you are certain that an item does not apply, please write "n/a" and provide a short explanation.

Upload your completed checklist as an extra file when you submit to a journal.

In your methods section, say that you used the STROBE cohort reporting guidelines, and cite them as:

von Elm E, Altman DG, Egger M, Pocock SJ, Gøtzsche PC, Vandenbroucke JP. The Strengthening of Reporting of Observational Studies in Epidemiology (STROBE) Statement: guidelines for reporting observational studies.

|                           | Reporting Item                                                                                            | Page Number |
|---------------------------|-----------------------------------------------------------------------------------------------------------|-------------|
| <b>Title and abstract</b> |                                                                                                           |             |
| Title                     | <a href="#">#1a</a> Indicate the study's design with a commonly used term in the title or the abstract    | 2           |
| Abstract                  | <a href="#">#1b</a> Provide in the abstract an informative and balanced summary of what was done and what | 2           |

was found

## Introduction

Background / [#2](#) Explain the scientific background and rationale for 4-5  
 rationale the investigation being reported

Objectives [#3](#) State specific objectives, including any 5  
 prespecified hypotheses

## Methods

Study design [#4](#) Present key elements of study design early in the 7-8  
 paper

Setting [#5](#) Describe the setting, locations, and relevant dates, 5-6  
 including periods of recruitment, exposure, follow-up, and data collection

Eligibility criteria [#6a](#) Give the eligibility criteria, and the sources and 6  
 methods of selection of participants. Describe methods of follow-up.

Eligibility criteria [#6b](#) For matched studies, give matching criteria and n/a  
 number of exposed and unexposed  
 Not matched studies

Variables [#7](#) Clearly define all outcomes, exposures, predictors, 6-8  
 potential confounders, and effect modifiers. Give diagnostic criteria, if applicable

Data sources / [#8](#) For each variable of interest give sources of data 6-8  
 measurement and details of methods of assessment

(measurement). Describe comparability of assessment methods if there is more than one group. Give information separately for for exposed and unexposed groups if applicable.

|                        |                      |                                                                                                                               |                                                                     |
|------------------------|----------------------|-------------------------------------------------------------------------------------------------------------------------------|---------------------------------------------------------------------|
| Bias                   | <a href="#">#9</a>   | Describe any efforts to address potential sources of bias                                                                     | 8                                                                   |
| Study size             | <a href="#">#10</a>  | Explain how the study size was arrived at                                                                                     | n/a                                                                 |
|                        |                      |                                                                                                                               | Including all the patients admitted to the ICU in the study period. |
| Quantitative variables | <a href="#">#11</a>  | Explain how quantitative variables were handled in the analyses. If applicable, describe which groupings were chosen, and why | 7                                                                   |
| Statistical methods    | <a href="#">#12a</a> | Describe all statistical methods, including those used to control for confounding                                             | 7-8                                                                 |
| Statistical methods    | <a href="#">#12b</a> | Describe any methods used to examine subgroups and interactions                                                               | 8                                                                   |
| Statistical methods    | <a href="#">#12c</a> | Explain how missing data were addressed                                                                                       | n/a                                                                 |
|                        |                      |                                                                                                                               | No missing data.                                                    |
| Statistical methods    | <a href="#">#12d</a> | If applicable, explain how loss to follow-up was addressed                                                                    | n/a                                                                 |
|                        |                      |                                                                                                                               | Not applicable                                                      |

|    |                  |                      |                                                      |                  |
|----|------------------|----------------------|------------------------------------------------------|------------------|
| 1  | Statistical      | <a href="#">#12e</a> | Describe any sensitivity analyses                    | n/a              |
| 2  |                  |                      |                                                      |                  |
| 3  | methods          |                      |                                                      | Not done.        |
| 4  |                  |                      |                                                      |                  |
| 5  |                  |                      |                                                      |                  |
| 6  |                  |                      |                                                      |                  |
| 7  | <b>Results</b>   |                      |                                                      |                  |
| 8  |                  |                      |                                                      |                  |
| 9  |                  |                      |                                                      |                  |
| 10 | Participants     | <a href="#">#13a</a> | Report numbers of individuals at each stage of       | 9                |
| 11 |                  |                      | study—eg numbers potentially eligible, examined      |                  |
| 12 |                  |                      | for eligibility, confirmed eligible, included in the |                  |
| 13 |                  |                      | study, completing follow-up, and analysed. Give      |                  |
| 14 |                  |                      | information separately for for exposed and           |                  |
| 15 |                  |                      | unexposed groups if applicable.                      |                  |
| 16 |                  |                      |                                                      |                  |
| 17 |                  |                      |                                                      |                  |
| 18 |                  |                      |                                                      |                  |
| 19 |                  |                      |                                                      |                  |
| 20 |                  |                      |                                                      |                  |
| 21 |                  |                      |                                                      |                  |
| 22 |                  |                      |                                                      |                  |
| 23 |                  |                      |                                                      |                  |
| 24 |                  |                      |                                                      |                  |
| 25 | Participants     | <a href="#">#13b</a> | Give reasons for non-participation at each stage     | 9                |
| 26 |                  |                      |                                                      |                  |
| 27 |                  |                      |                                                      |                  |
| 28 | Participants     | <a href="#">#13c</a> | Consider use of a flow diagram                       | Figure 1         |
| 29 |                  |                      |                                                      |                  |
| 30 |                  |                      |                                                      |                  |
| 31 | Descriptive data | <a href="#">#14a</a> | Give characteristics of study participants (eg       | 19-23            |
| 32 |                  |                      | demographic, clinical, social) and information on    |                  |
| 33 |                  |                      | exposures and potential confounders. Give            |                  |
| 34 |                  |                      | information separately for exposed and unexposed     |                  |
| 35 |                  |                      | groups if applicable.                                |                  |
| 36 |                  |                      |                                                      |                  |
| 37 |                  |                      |                                                      |                  |
| 38 |                  |                      |                                                      |                  |
| 39 |                  |                      |                                                      |                  |
| 40 |                  |                      |                                                      |                  |
| 41 |                  |                      |                                                      |                  |
| 42 |                  |                      |                                                      |                  |
| 43 | Descriptive data | <a href="#">#14b</a> | Indicate number of participants with missing data    | n/a              |
| 44 |                  |                      | for each variable of interest                        |                  |
| 45 |                  |                      |                                                      | No missing data. |
| 46 |                  |                      |                                                      |                  |
| 47 |                  |                      |                                                      |                  |
| 48 |                  |                      |                                                      |                  |
| 49 | Descriptive data | <a href="#">#14c</a> | Summarise follow-up time (eg, average and total      | Figure 2         |
| 50 |                  |                      | amount)                                              |                  |
| 51 |                  |                      |                                                      |                  |
| 52 |                  |                      |                                                      |                  |
| 53 |                  |                      |                                                      |                  |
| 54 |                  |                      |                                                      |                  |
| 55 | Outcome data     | <a href="#">#15</a>  | Report numbers of outcome events or summary          | 19-23            |
| 56 |                  |                      | measures over time. Give information separately      |                  |
| 57 |                  |                      |                                                      |                  |
| 58 |                  |                      |                                                      |                  |
| 59 |                  |                      |                                                      |                  |
| 60 |                  |                      |                                                      |                  |

|    |                   |                                                                           |                       |
|----|-------------------|---------------------------------------------------------------------------|-----------------------|
| 1  |                   | for exposed and unexposed groups if applicable.                           |                       |
| 2  |                   |                                                                           |                       |
| 3  |                   |                                                                           |                       |
| 4  | Main results      | <a href="#">#16a</a> Give unadjusted estimates and, if applicable,        | 19-23                 |
| 5  |                   |                                                                           |                       |
| 6  |                   | confounder-adjusted estimates and their precision                         |                       |
| 7  |                   |                                                                           |                       |
| 8  |                   | (eg, 95% confidence interval). Make clear which                           |                       |
| 9  |                   |                                                                           |                       |
| 10 |                   | confounders were adjusted for and why they were                           |                       |
| 11 |                   |                                                                           |                       |
| 12 |                   | included                                                                  |                       |
| 13 |                   |                                                                           |                       |
| 14 |                   |                                                                           |                       |
| 15 |                   |                                                                           |                       |
| 16 | Main results      | <a href="#">#16b</a> Report category boundaries when continuous           | n/a                   |
| 17 |                   |                                                                           |                       |
| 18 |                   | variables were categorized                                                |                       |
| 19 |                   |                                                                           | Continuous variables  |
| 20 |                   |                                                                           |                       |
| 21 |                   |                                                                           | were not categorized. |
| 22 |                   |                                                                           |                       |
| 23 |                   |                                                                           |                       |
| 24 | Main results      | <a href="#">#16c</a> If relevant, consider translating estimates of       | n/a                   |
| 25 |                   |                                                                           |                       |
| 26 |                   | relative risk into absolute risk for a meaningful time                    |                       |
| 27 |                   |                                                                           | Not applicable        |
| 28 |                   | period                                                                    |                       |
| 29 |                   |                                                                           |                       |
| 30 |                   |                                                                           |                       |
| 31 |                   |                                                                           |                       |
| 32 | Other analyses    | <a href="#">#17</a> Report other analyses done—e.g., analyses of          | Supplementary files   |
| 33 |                   |                                                                           |                       |
| 34 |                   | subgroups and interactions, and sensitivity                               |                       |
| 35 |                   |                                                                           |                       |
| 36 |                   | analyses                                                                  |                       |
| 37 |                   |                                                                           |                       |
| 38 |                   |                                                                           |                       |
| 39 | <b>Discussion</b> |                                                                           |                       |
| 40 |                   |                                                                           |                       |
| 41 |                   |                                                                           |                       |
| 42 | Key results       | <a href="#">#18</a> Summarise key results with reference to study         | 11-13                 |
| 43 |                   |                                                                           |                       |
| 44 |                   | objectives                                                                |                       |
| 45 |                   |                                                                           |                       |
| 46 |                   |                                                                           |                       |
| 47 |                   |                                                                           |                       |
| 48 | Limitations       | <a href="#">#19</a> Discuss limitations of the study, taking into account | 13                    |
| 49 |                   |                                                                           |                       |
| 50 |                   | sources of potential bias or imprecision. Discuss                         |                       |
| 51 |                   |                                                                           |                       |
| 52 |                   | both direction and magnitude of any potential bias.                       |                       |
| 53 |                   |                                                                           |                       |
| 54 |                   |                                                                           |                       |
| 55 | Interpretation    | <a href="#">#20</a> Give a cautious overall interpretation considering    | 11-13                 |
| 56 |                   |                                                                           |                       |
| 57 |                   | objectives, limitations, multiplicity of analyses,                        |                       |
| 58 |                   |                                                                           |                       |
| 59 |                   |                                                                           |                       |
| 60 |                   |                                                                           |                       |

1 results from similar studies, and other relevant  
2  
3 evidence.  
4

5  
6 Generalisability [#21](#) Discuss the generalisability (external validity) of 13  
7  
8 the study results  
9

## 10 11 Other

### 12 13 Information

14  
15  
16 Funding [#22](#) Give the source of funding and the role of the 14  
17  
18 funders for the present study and, if applicable, for  
19 the original study on which the present article is  
20  
21 based  
22  
23  
24  
25

26 None The STROBE checklist is distributed under the terms of the Creative Commons Attribution  
27 License CC-BY. This checklist can be completed online using <https://www.goodreports.org/>, a tool  
28  
29 made by the [EQUATOR Network](#) in collaboration with [Penelope.ai](#)  
30  
31  
32  
33  
34  
35  
36  
37  
38  
39  
40  
41  
42  
43  
44  
45  
46  
47  
48  
49  
50  
51  
52  
53  
54  
55  
56  
57  
58  
59  
60

# BMJ Open

## Risk factor of intestinal carriage of carbapenem-resistant *Acinetobacter baumannii* and the impact on subsequent infection among patients in an intensive care unit: an observational study

|                                 |                                                                                                                                                                                                                                                                                                                                                                                                                                                                                                                                                                                                                                                                                                                                                                                                                                                                       |
|---------------------------------|-----------------------------------------------------------------------------------------------------------------------------------------------------------------------------------------------------------------------------------------------------------------------------------------------------------------------------------------------------------------------------------------------------------------------------------------------------------------------------------------------------------------------------------------------------------------------------------------------------------------------------------------------------------------------------------------------------------------------------------------------------------------------------------------------------------------------------------------------------------------------|
| Journal:                        | <i>BMJ Open</i>                                                                                                                                                                                                                                                                                                                                                                                                                                                                                                                                                                                                                                                                                                                                                                                                                                                       |
| Manuscript ID                   | bmjopen-2019-035893.R2                                                                                                                                                                                                                                                                                                                                                                                                                                                                                                                                                                                                                                                                                                                                                                                                                                                |
| Article Type:                   | Original research                                                                                                                                                                                                                                                                                                                                                                                                                                                                                                                                                                                                                                                                                                                                                                                                                                                     |
| Date Submitted by the Author:   | 20-Jul-2020                                                                                                                                                                                                                                                                                                                                                                                                                                                                                                                                                                                                                                                                                                                                                                                                                                                           |
| Complete List of Authors:       | Qiao, Fu; Sichuan University West China Hospital, Department of Infection Control<br>Huang, Wenzhi; Sichuan University West China Hospital, Department of Infection Control<br>Gao, Shan; Zhengzhou University First Affiliated Hospital, Department of Infection Control<br>Cai, Lin; Sichuan University West China Hospital, Intensive Care Unit<br>Zhu, Shichao; Sichuan University West China Hospital, Department of Infection Control<br>Wei, Li; Sichuan University West China Hospital, Department of Infection Control<br>Kang, Yan; Sichuan University West China Hospital, Intensive Care Unit<br>Tao, Chuanmin; Sichuan University West China Hospital, Department of Laboratory Medicine<br>Zong, Zhiyong; Sichuan University West China Hospital, Department of Infection Control; Sichuan University West China Hospital, Center of Infectious Disease |
| <b>Primary Subject Heading</b>: | Epidemiology                                                                                                                                                                                                                                                                                                                                                                                                                                                                                                                                                                                                                                                                                                                                                                                                                                                          |
| Secondary Subject Heading:      | Infectious diseases                                                                                                                                                                                                                                                                                                                                                                                                                                                                                                                                                                                                                                                                                                                                                                                                                                                   |
| Keywords:                       | EPIDEMIOLOGY, Adult intensive & critical care < INTENSIVE & CRITICAL CARE, Infection control < INFECTIOUS DISEASES                                                                                                                                                                                                                                                                                                                                                                                                                                                                                                                                                                                                                                                                                                                                                    |
|                                 |                                                                                                                                                                                                                                                                                                                                                                                                                                                                                                                                                                                                                                                                                                                                                                                                                                                                       |

SCHOLARONE™  
Manuscripts



I, the Submitting Author has the right to grant and does grant on behalf of all authors of the Work (as defined in the below author licence), an exclusive licence and/or a non-exclusive licence for contributions from authors who are: i) UK Crown employees; ii) where BMJ has agreed a CC-BY licence shall apply, and/or iii) in accordance with the terms applicable for US Federal Government officers or employees acting as part of their official duties; on a worldwide, perpetual, irrevocable, royalty-free basis to BMJ Publishing Group Ltd ("BMJ") its licensees and where the relevant Journal is co-owned by BMJ to the co-owners of the Journal, to publish the Work in this journal and any other BMJ products and to exploit all rights, as set out in our [licence](#).

The Submitting Author accepts and understands that any supply made under these terms is made by BMJ to the Submitting Author unless you are acting as an employee on behalf of your employer or a postgraduate student of an affiliated institution which is paying any applicable article publishing charge ("APC") for Open Access articles. Where the Submitting Author wishes to make the Work available on an Open Access basis (and intends to pay the relevant APC), the terms of reuse of such Open Access shall be governed by a Creative Commons licence – details of these licences and which [Creative Commons](#) licence will apply to this Work are set out in our licence referred to above.

Other than as permitted in any relevant BMJ Author's Self Archiving Policies, I confirm this Work has not been accepted for publication elsewhere, is not being considered for publication elsewhere and does not duplicate material already published. I confirm all authors consent to publication of this Work and authorise the granting of this licence.



1  
2  
3  
4 1 **Risk factor of intestinal carriage of carbapenem-resistant**  
5  
6  
7 2 **Acinetobacter baumannii and the impact on subsequent infection**  
8  
9  
10 3 **among patients in an intensive care unit: an observational study**

11  
12 4 Fu Qiao<sup>1</sup>, Wenzhi Huang<sup>1</sup>, Shan Gao<sup>2</sup>, Lin Cai<sup>3</sup>, Shichao Zhu<sup>1</sup>, Li Wei<sup>1</sup>, Yan Kang<sup>3</sup>,  
13  
14  
15 5 Chuanmin Tao<sup>4\*</sup>, Zhiyong Zong<sup>1,5\*</sup>

16  
17 6 <sup>1</sup> Department of Infection Control, West China Hospital, Sichuan University, Chengdu, China.

18  
19 7 <sup>2</sup> Department of Infection Control, The First Affiliated Hospital of Zhengzhou University,

20  
21 8 Zhengzhou, China. <sup>3</sup> Intensive Care Unit, West China Hospital, Sichuan University, Chengdu,

22  
23 9 China. <sup>4</sup> Department of Laboratory Medicine, West China Hospital, Sichuan University,

24  
25 10 Chengdu, China. <sup>5</sup> Center of Infectious Disease, West China Hospital, Sichuan University,

26  
27 11 Chengdu, China

28  
29  
30  
31  
32  
33 13 **Running title: intestinal carriage of CRAB in ICU**

34  
35  
36  
37  
38 15 Keywords: carbapenem-resistant; *Acinetobacter baumannii*; intestinal carriage; intensive care unit.

39  
40 16 Word count: 3147

41  
42 17 **\*Co-corresponding author**

43  
44 18 Dr. Chuanmin Tao, Department of Laboratory Medicine, West China Hospital, Sichuan

45  
46 19 University, Chengdu, China. Email: [taocm@scu.edu.cn](mailto:taocm@scu.edu.cn)

47  
48 20 Dr. Zhiyong Zong, Center of Infectious Diseases, West China Hospital (Huaxi), Guoxuexiang 37,

49  
50 21 Chengdu 610041, China. Phone: 86-28-8542-2637. Fax: 86-28-8542-3212. E-mail:

51  
52 22 [zongzhiyong@gmail.com](mailto:zongzhiyong@gmail.com)

## 23 Abstract

24 **Objectives:** To assess the incidence and the impact of carbapenem-resistant *Acinetobacter*  
25 *baumannii* (CRAB) intestinal carriage on subsequent CRAB infection and to study risk factors of  
26 acquiring CRAB intestinal carriage among patients in intensive care unit (ICU).

27 **Design:** Observational study including a case control study and a retrospective cohort study.

28 **Setting:** A 50-bed general ICU of a university hospital, China.

29 **Methods:** From May 2017 to April 2018, an observational study was conducted in a 50-bed  
30 general ICU of a university hospital in China. Rectal swabs were collected from ICU patients on  
31 admission and thereafter weekly. A case control study was performed to analyze risk factors of the  
32 acquisition of CRAB intestinal carriage in ICU using multiple logistic regression. A retrospective  
33 cohort study was performed to address whether intestinal CRAB carriage could lead to an  
34 increased likelihood of subsequent CRAB infection using sub-distribution hazard model  
35 regarding death in the ICU as a competing risk event.

36 **Results:** CRAB intestinal carriage was detected in 6.87% (66/961; 95% CI 5.27%–8.47%) of  
37 patients on ICU admission, whereas 11.97% (115/961; 95% CI 9.91%–14.02%) of patients  
38 acquired CRAB intestinal carriage during the ICU stay. Pancreatitis (OR 2.16, 95% CI 1.28–3.67),  
39 hematological disease (OR 2.26, 95% CI 1.42–3.58), gastric tube feeding (OR 3.35, 95% CI 2.03–  
40 5.51), and use of carbapenems (OR 1.84, 95% CI 1.11–3.07) were independent risk factors for  
41 acquiring CRAB intestinal carriage. The incidence of subsequent CRAB infection was 2.24-fold  
42 in patients with CRAB intestinal carriage compared to that in patients without (95% CI 1.48–3.39,  
43  $P<0.001$ ).

44 **Conclusion:** More patients acquired CRAB intestinal carriage during their ICU stay than had on  
45 admission. Severity of illness, acute pancreatitis, tube feeding, and use of carbapenems were

1  
2  
3 46 independent risk factors of acquisition of CRAB intestinal carriage. Patients with CRAB intestinal  
4  
5 47 carriage are more likely to develop CRAB infection.  
6  
7  
8 48

9  
10 49 **Strengths and limitations of this study**

11  
12 50 This observational study contains a combination of a case control study for analyzing risk factors  
13  
14 51 of the acquisition of CRAB intestinal carriage in ICU and a retrospective cohort study to address  
15  
16 52 whether intestinal CRAB carriage was associated with subsequent CRAB infection.  
17  
18

19 53 The competing risk of death in ICU was considered using a well-established model.  
20

21 54 This is a single-unit study and the findings may not be generalized.  
22

23 55 A culture-based method to screen CRAB, which is less sensitive than PCR-based methods.  
24

25  
26 56 Only rectal swabs were collected for screening CRAB and some CRAB carriers might have been  
27  
28 57 missed.  
29  
30  
31  
32  
33  
34  
35  
36  
37  
38  
39  
40  
41  
42  
43  
44  
45  
46  
47  
48  
49  
50  
51  
52  
53  
54  
55  
56  
57

## 58 Background

59 *Acinetobacter baumannii* is one of the most common nosocomial pathogens in Asia and  
60 South America[1]. A systematic review has revealed that *A. baumannii* accounted for 11.28% of  
61 nosocomial infections in general hospitals in China, making it the third most common nosocomial  
62 pathogen[2]. And carbapenem-resistant *A. baumannii* (CRAB) has emerged worldwide. As early  
63 as 2013, the US Centers for Disease Control and Prevention listed multi-drug resistant *A.*  
64 *baumannii* (MDRAB) including CRAB as a serious threat[3], and the World Health Organization  
65 listed CRAB as one of the three most critical threats in a global drug-resistant warning in 2017[4].  
66 The prevalence of *A. baumannii* and its resistance to carbapenems varies from country to country.  
67 For instance, the European Bacterial Resistance Surveillance Report shows that the rate of  
68 *Acinetobacter* resistant to carbapenem in Europe in 2017 was 33.4% (95% CI 32%–35%), but it  
69 was as high as 96.2% in Croatia (95% CI 92%–98%) [5]. In the US, 49.5% of *A. baumannii* is  
70 resistant to carbapenems, while in Singapore, India, and Pakistan, it is 50%, 85%, and 62-100%,  
71 respectively[6,7]. The prevalence of CRAB is also very high in China. The surveillance data  
72 released by CHINET (China Antimicrobial Surveillance Network; <http://chinets.com/Chinet>), a  
73 national network in China, have shown that 77.1% and 78.1% of *A. baumannii* isolates resistant to  
74 imipenem and meropenem, respectively[8].

75 Infections caused by CRAB can lead to serious consequences. A previous study has  
76 demonstrated that patients with CRAB infection had longer average length of stay (LOS) in ICUs  
77 (13.1 vs. 10.5 days) and \$11,359 higher average in-hospital costs than those with carbapenem-  
78 susceptible *A. baumannii* (CSAB) infection[9]. Another previous study has found that the  
79 mortality rate of patients with CRAB infection is 2.22-fold that of patients with CSAB  
80 infection[10]. A case-control study conducted by our team have also showed that the 28-day

1  
2  
3 81 survival rate of patients with bloodstream CRAB infection was 66.17%, lower than the 96.95% of  
4  
5 82 those with bloodstream CSAB infection[11].  
6

7  
8 83 It is well known that *A. baumannii* including CRAB may colonized in the respiratory tract of  
9  
10 84 hospitalized patients, in particular those with mechanical ventilation[12,13]. The colonization of  
11  
12 85 CRAB in the respiratory tract has been found as a major risk factor for subsequent CRAB  
13  
14 86 infection[14]. However, ICU patients may carry CRAB in intestine on admission or acquire CRAB  
15  
16 87 during the ICU stay[15]. Patients with intestinal carriage of multi-drug resistant organisms  
17  
18 88 (MDRO), in particular carbapenem-resistant *Enterobacteriaceae* (CRE), may sever as a reservoir  
19  
20 89 for further dissemination in ICU[16] and could be associated with be associated with an increased  
21  
22 90 risk of subsequent MDRO infections[17]. Therefore, active screening the carriage of CRE, which  
23  
24 91 is usually performed using rectal swabs, has been recommended as a core component of the  
25  
26 92 infection control bundle[7]. However, by contrast to CRE, the prevalence of CRAB intestinal  
27  
28 93 carriage among ICU patients is much less studied and the risk factors of acquisition of CRAB  
29  
30 94 intestinal carriage remains largely unknown. In addition, it remains to be determined whether  
31  
32 95 CRAB intestinal carriage leads to increased risks of subsequent CRAB infection. To address these  
33  
34 96 questions, we therefore conducted this study.  
35  
36  
37  
38  
39  
40  
41

## 42 98 **Methods**

### 43 99 **Study settings**

44  
45  
46  
47 100 An observational study was conducted in a 50-bed general ICU of a 4,300-bed university  
48  
49 101 hospital in China. From May 2017 to April 2018, all patients admitted to the ICU were subjected  
50  
51 102 to collecting a rectal swab within 48 h of admission and thereafter weekly. For patients hospitalized  
52  
53 103 for less than 3 days, a rectal swab was collected only once within 48 h of admission.  
54  
55  
56  
57  
58  
59  
60

104

**105 Inclusion and exclusion criteria**

106 Inclusion criteria: This study included all patients who were  $\geq 18$  years of age, admitted to  
107 the ICU, and underwent collection of rectal swabs.

108 Exclusion criteria: 1) patients who did not receive a rectal swab within 48 h of admission to  
109 ICU; or 2) patients who were eligible for weekly follow-up collection of rectal swabs but did not  
110 receive subsequent sampling; or 3) patients with CRAB infection on admission.

111

112

**113 Definitions**

114 Patients with CRAB intestinal carriage were defined as those with CRAB isolated from a  
115 rectal swab, while patient without CRAB intestinal carriage referred to those whose swabs were  
116 all negative for CRAB during the ICU stay. Patients with CRAB isolated from a rectal swab  
117 collected within 48 h of ICU admission were defined as those with CRAB intestinal carriage on  
118 ICU admission. The acquisition of CRAB intestinal carriage referred to a patient who had a CRAB-  
119 negative rectal swab collected within 48 h of ICU admission but had CRAB from a swab collected  
120 after 48 h. CRAB infection was defined as the growth of CRAB from clinical specimens in the  
121 presence of clinical manifestations of infection[18]. Subsequent CRAB infection referred to  
122 CRAB infection developed after the collection of a CRAB-positive rectal swab for patients with  
123 CRAB intestinal carriage and CRAB infection developed after 48 h admission to the ICU for  
124 patients without CRAB intestinal carriage.

**125 Screening for CRAB by rectal swabs**

126 For collecting rectal swabs, ready-to-use transport medium swabs (HBPT004; Hopebio

1  
2  
3 127 Biotechnology, Qingdao, China) was inserted about 2–3 cm into the patient's anus and then gently  
4  
5 128 rotated. After sampling, the swab was inserted into the ready-to-use transport medium and  
6  
7  
8 129 transported to the laboratory within 2 h. Rectal swabs were inoculated onto modified CHROMagar  
9  
10 130 *Acinetobacter* colorimetric plates (Chromagar; Paris, France) containing 2 mg/L meropenem using  
11  
12 131 the partition-and-streaking method[19,20]. Plates were then cultured at 37°C for 18–24 h[20].  
13  
14  
15 132

### 17 133 **Data collection and statistical analysis**

18  
19 134 In this study, the patient's demographic data, underlying diseases, invasive procedures,  
20  
21 135 medical orders, and use of antimicrobial agents were retrieved from the electronic medical record  
22  
23  
24 136 system. Two professional statisticians collaborated to clean the data.  
25

26 137 We performed two types of comparison. First, a case control study was performed to analyze  
27  
28 138 risk factors of the acquisition of CRAB intestinal carriage in ICU. Patients with ICU acquisition  
29  
30 139 of CRAB intestinal carriage were assigned to the case group, while those without CRAB intestinal  
31  
32  
33 140 carriage during their ICU stay were assigned to the control group. All potential factors were  
34  
35 141 initially subjected to the univariate analysis. Quantitative data were described by the median  
36  
37  
38 142 (interquartile range) and were then analyzed using a rank-sum test. Qualitative data were described  
39  
40 143 by number of cases (composition ratio) and were then analyzed using the chi-square test or Fisher  
41  
42 144 exact probability method when applied. All variables showing *P* value less than 0.2 in the  
43  
44  
45 145 univariate analysis were then included into the multiple logistic regression using the forward  
46  
47 146 selection stepwise regression method[21,22]. Odds ratio (OR) and 95% confidence interval (CI)  
48  
49 147 were calculated. The Hosmer-Lemeshow method was used to test the goodness-of-fit of the  
50  
51 148 multiple logistic model[23].  
52

53  
54 149 Second, a retrospective cohort study was performed to address whether intestinal CRAB  
55  
56

1  
2  
3 150 carriage could lead to an increased likelihood of subsequent CRAB infection. In this cohort study,  
4  
5 151 the exposed group comprised patients with CRAB intestinal carriage either detected on ICU  
6  
7 152 admission or acquired during the ICU stay, while the non-exposed group consisted of those without  
8  
9  
10 153 CRAB intestinal carriage. As the impact of CRAB intestinal carriage on subsequent infection may  
11  
12 154 also be influenced by other factors such as patient demographics, underlying diseases,  
13  
14 155 antimicrobial use and medical operations, we included these factors for analysis instead of  
15  
16 156 evaluating CRAB carriage alone. Survival curves (probability of CRAB infection) in patients with  
17  
18 157 and without CRAB intestinal carriage were mapped using the Fine and Gray model regarding death  
19  
20 158 in the ICU as a competing risk event [24,25]. After introducing the interaction term of time and  
21  
22 159 each variable ( $X \cdot \ln(T)$ ) into the COX model [24,25], the proportional hazards hypothesis was  
23  
24 160 tested, and the results showed no statistical significance ( $P < 0.05$ ). Therefore, sub-distribution  
25  
26 161 hazard model was used to obtain sub-distribution hazard ratios (SDHRs) and to explore whether  
27  
28 162 CRAB intestinal carriage was a risk factor for subsequent CRAB infection for competing events  
29  
30  
31 163 (R package “cmprsk”)The Akaike information criteria (AIC) was used to select the multivariate  
32  
33 164 model[26]. We also performed subgroup analyses to investigate whether CRAB intestinal carriage  
34  
35 165 on ICU admission and that acquired in ICU had different impact on subsequent CRAB infection  
36  
37 166 using the same statistical method as describe above. For the subgroup analysis, patients with  
38  
39 167 CRAB intestinal carriage on ICU admission and those with ICU acquisition of CRAB intestinal  
40  
41 168 carriage were assigned to two exposed subgroups, respectively, while those without CRAB  
42  
43 169 intestinal carriage were assigned to the non-exposed group.  
44  
45  
46  
47  
48

49 170 All statistical analyses were performed using SPSS 21.0 (IBM–SPSS Inc; Armonk, NY, US)  
50  
51 171 and R version 3.5.3 with a 0.05 two-sided test level.  
52  
53

54 172  
55  
56  
57  
58  
59  
60



## 173 **Patient and public involvement**

174 Patients were not involved in this study.

## 176 **Results**

### 177 **Some patients (6.87%) had CRAB intestinal carriage on ICU admission and more (12.85%)** 178 **acquired in ICU**

179 From May 1, 2017 to April 30, 2018, a total of 1,605 patients were admitted to the ICU, of  
180 which 382 (23.8%) were not screened during their hospital stay. Of which the 382 patients, 323  
181 (84.55%) stayed in the ICU for no more than 2 days, while the other 59 (15.45%) patients were  
182 missed for sampling. In addition, 118 patients (118/1,605, 7.4%) were excluded due to  
183 inappropriate or incomplete sampling including 104 patients whose first rectal swab was collected  
184 48 h after admission and 14 patients who were not screened weekly. A total of 144 (144/1,605,  
185 8.97%) had CRAB infection on ICU admission and were therefore also excluded. Taken together,  
186 a total of 961 patients (620 males, 64.52% and 341 female 35.48%) were included in the analysis,  
187 with an average age of 54 (44–68) years (Figure 1).

188 Among the 961 patients, 66 (6.87%, 95% CI 5.27%–8.47%) had CRAB intestinal carriage on  
189 ICU admission. For the remaining 895 patients, 115 acquired (12.85%, 95% CI 10.66%–15.04%)  
190 CRAB intestinal carriage during their ICU stay with an average age of 51 (40–70) and a 1.61  
191 male/female ratio (71 male and 44 female).

### 193 **Multiple risks factors of acquiring CRAB intestinal carriage were identified**

194 The univariate analysis showed that APACHE II score (the patient's disease severity),  
195 respiratory failure, renal dysfunction, hematological disease, acute pancreatitis, indwelling central

1  
2  
3 196 venous catheter, gastric tube feeding, nebulization, and use of vancomycin, aminoglycosides,  
4  
5 197 carbapenems, tigecycline, and antifungal agents are risk factors for the acquisition of CRAB  
6  
7 198 intestinal carriage in the ICU. Multiple logistic regression including all variables with  $P < 0.2$  in  
8  
9  
10 199 the univariate analysis showed that APACHE II score, pancreatitis, hematological diseases, gastric  
11  
12 200 tube feeding, and use of carbapenems were independent risk factors for acquiring CRAB intestinal  
13  
14 201 carriage during the ICU stay (Table 1). For APACHE II score, the model estimated that the  
15  
16 202 increase of the score by 1 point would lead to a 4% increase of the risk of acquiring CRAB  
17  
18 203 intestinal carriage in the ICU. Hosmer-Lemeshow test generated a 0.73 P value ( $\chi^2=5.25$ ,  $df=8$ ),  
19  
20  
21 204 suggesting adequate goodness-of-fit of the multiple logistic model.  
22  
23  
24 205

### 206 **CRAB intestinal carriage led to increased risks of subsequent CRAB infection**

207 During the study period, 112 of the 961 patients (11.65%, 95% CI 9.63%–13.68%) developed  
208 CRAB infections during the ICU stay. As for the infection type, lower respiratory tract infections  
209 were the most common ( $n=82$ , 73.21%), followed by bloodstream infections ( $n=9$ , 8.04%),  
210 surgical site infection ( $n=8$ , 7.14%), while 13 patients (11.61%) had infections at other sites.  
211 CRAB intestinal carriage was a risk factor for subsequent CRAB infection (HR 2.82, 95% CI  
212 1.94–4.09;  $P < 0.001$ ; Figure 2). The 90-day cumulative probability of no CRAB infection in  
213 patients with and without CRAB intestinal carriage was 69.5.0% (95% CI 43.5%–95.5%) and  
214 22.3% (95% CI 14.7%–29.9%), respectively ( $P < 0.001$ ). In the univariate analysis, CRAB  
215 intestinal carriage, APACHE II score, respiratory failure, liver dysfunction, hematological disease,  
216 pancreatitis, mechanical ventilation, placement of a central venous catheter, gastric tube feeding,  
217 and the use of carbapenems were identified as risk factors for subsequent CRAB infection. In the  
218 COX multivariate analysis, CRAB intestinal carriage was also found to be an independent risk

1  
2  
3 219 factor for subsequent CRAB infection (HR 2.24, 95% CI 1.48–3.39; Table 2). Omnibus test  
4  
5 220 showed a log likelihood difference of 79.82 and generated a less than 0.001 P value, suggesting  
6  
7 221 adequate goodness-of-fit of the COX model.

8  
9  
10 222 To evaluate whether CRAB intestinal carriage on admission and that acquired during the ICU  
11  
12 223 stay has different impact on subsequent CRAB, we performed subgroup analyses. In the subgroup  
13  
14 224 COX multivariate analysis, both CRAB intestinal carriage on admission and that acquired during  
15  
16 225 the ICU stay were an independent risk factor for subsequent CRAB infection (HR 3.42, 95% CI  
17  
18 226 1.88–6.22 for carriage on admission, Table S1 in the Supplementary file; HR 1.81, 95% CI 1.15–  
19  
20 227 2.86 for acquired carriage, Table S2). Omnibus test showed log likelihood difference of 66.06 and  
21  
22 228 74.18, respectively, and generated a less than 0.001 P value in the subgroup analysis, suggesting  
23  
24 229 adequate goodness-of-fit of the COX model.

25  
26  
27 230 In addition to CRAB intestinal carriage, liver dysfunction (HR 2.33, 95% CI 1.30–4.17), and  
28  
29 231 the use of carbapenems (HR 2.21, 95% CI 1.40–3.49), were also identified as independent risk  
30  
31 232 factors of subsequent CRAB infection, while the use of cephalosporins (HR 0.45, 95% CI 0.28–  
32  
33 233 0.73) and cephamycins (HR 0.53, 95% CI 0.31–0.90) were protective factors (Table 2).

## 34 35 36 37 38 39 40 235 **Discussion**

41  
42 236 In this study, we found that in a region with a high CRAB prevalence, 6.87% of patients  
43  
44 237 (83.3% of those patients were transferred from other hospitals and 25.8% of them were stayed in  
45  
46 238 emergency ICU before admitted to the ICU) admitted to the ICU had CRAB intestinal carriage on  
47  
48 239 ICU admission, while an additional 11.97% of patients acquired CRAB intestinal carriage during  
49  
50 240 the ICU stay. The overall CRAB intestinal carriage rate was therefore 18.84%. This rate was  
51  
52 241 similar with a study conduct in Thailand, in which 5.45% (15/275) of patients had intestinal  
53  
54  
55

1  
2  
3 242 carriage on ICU admission and 13.59% (28/206) patients acquired CRAB during their ICU  
4  
5 243 stay[15] and with another study in Italy[27], in which 18.92%(74/391) of patients carried CRAB  
6  
7 244 during ICU stay. However, the rate was significantly higher than those in Turkey (7.22%,  
8  
9 245 55/762)[28], Brazil (13.23%, 43/325)[29], USA (13.46%, 49/364)[30], and South Korea (15.06%,  
10  
11 246 168/1,115)[14], although other sites such as respiratory secretions were also screened in these  
12  
13  
14  
15 247 studies. This difference may be related to the local CRAB prevalence.

16  
17 248 Interestingly, we found that gastric tube feeding is a risk factor for both acquiring CRAB  
18  
19 249 intestinal carriage of CRAB in ICU, which is consistent with the findings of Kiddee et al[15], in  
20  
21 250 which tube feeding was also a high-risk factor for carriage of Gram-negative bacilli. This may  
22  
23 251 suggest an entry point of CRAB into human intestine. In this study, 73.0% (84/115) of patients  
24  
25 252 who acquired CRAB intestinal carriage using tube feeding. During the study, we performed a one-  
26  
27 253 day snapshot sampling of the feeding tubes (at the tube port), feeding contents and containers for  
28  
29 254 preparing feeding contents in the ICU and found the presence of CRAB in the tube feeding content  
30  
31 255 (24.0%, 6/25), at the tube port (33.3%, 3/9) and the tube feeding containers (7.1%, 1/14), indicating  
32  
33 256 contamination. This may be a key point for intervention in the ICU.

34  
35  
36  
37 257 We also found that patients with CRAB intestinal carriage were more likely to develop  
38  
39 258 subsequent CRAB infection than those without carriage. The survival curve in this study showed  
40  
41 259 that the cumulative infection rates in 90 days in patients with and without CRAB intestinal carriage  
42  
43 260 were 69.5% and 22.3%, respectively, similar to those reported in other studies[30]. However, the  
44  
45 261 HR was 2.24, which is much lower than those in previous studies[15,30,31]. This may be due to  
46  
47 262 the fact that healthcare associated infections in our ICU were mainly caused by lower respiratory  
48  
49 263 infections, which accounting for more than 70% of infections, while we only screened the  
50  
51 264 colonization of the intestines. Interestingly, we found that the use of cephalosporins and  
52  
53  
54  
55  
56  
57  
58  
59  
60

1  
2  
3 265 cephamycins led to lower risks of subsequent CRAB infection, while carbapenem use led to  
4  
5 266 increased risks. The association between CRAB and carbapenem use has been documented  
6  
7 267 before[30,32]. CRAB is usually resistant to cephalosporins and cephamycins. The use of  
8  
9 268 cephalosporins and cephamycins may reflect the fact that patients did not receive carbapenems  
10  
11 269 and could therefore result in reduced selection pressure for CRAB.

12  
13  
14 270 There are a few limitations in this study. First, this is a single center study and the findings  
15  
16 271 may not be generalized. Second, we used a modified CHROMagar *Acinetobacter* chromogenic  
17  
18 272 plate to screen CRAB from rectal swabs. Not all screened CRABs were confirmed using Vitek II  
19  
20 273 or other methods and there may be false negative results. Nonetheless, at the beginning of this  
21  
22 274 study, we confirmed that the 58 CRAB strains grown on the chromogenic medium were indeed all  
23  
24 275 *A. baumannii* by MALDI-TOF-MS and were all non-susceptible to imipenem or meropenem as  
25  
26 276 determined using the agar dilution method recommended by the Clinical and Laboratory Standards  
27  
28 277 Institute (CLSI)[20]. Third, we only collected the patients' rectal swabs for investigating CRAB  
29  
30 278 carriage. Studies have shown concurrent swab collection of skin, oropharyngeal, and airway  
31  
32 279 secretions in addition to rectal swabs, may improve sensitivity. However, the sample sizes in these  
33  
34 280 studies were small with only 21 and 34 cases, respectively[12,33]. Nonetheless, for practical  
35  
36 281 reasons and the aim to study CRAB intestinal carriage, we only collected rectal swabs. Fourth, due  
37  
38 282 to the poor sensitivity of rectal swabbing, a single negative test result could overlook carriers.  
39  
40 283 Moreover, no molecular strain typing was performed. Though reasonable, it was not proven that  
41  
42 284 CRAB isolated from intestinal colonization and site of nosocomial infection were identical. Last,  
43  
44 285 this study failed to collect for the first rectal swab specimen within 48 h of ICU admission from  
45  
46 286 23.8% of the patients. Nonetheless, 84.55% of these patients stayed in the ICU for less than 48 h.

47  
48  
49  
50  
51  
52  
53  
54 287

1  
2  
3 288 In conclusion, some patients had CRAB intestinal carriage but more acquired during their ICU  
4  
5 289 stay. Severity of illness, acute pancreatitis, tube feeding, and use of carbapenems were independent  
6  
7 290 risk factors of the acquisition of CRAB intestinal carriage. Patients with CRAB intestinal carriage  
8  
9  
10 291 were more likely to have subsequent CRAB infection than those without.  
11

12 292

### 14 293 **Acknowledgments**

15  
16  
17 294 We would like acknowledge the physicians and allied health staff of the ICU and the Department  
18  
19 295 of Electronic Medical Record system of West China Hospital.  
20

21 296

### 23 297 **Author contributions**

24  
25  
26 298 Fu Qiao, Zhiyong Zong and Chuanmin Tao contributed to study conception and design. Shichao  
27  
28 299 Zhu and Yan Kang contributed to acquisition of data. Lin Cai collected rectal swabs and  
29  
30 300 transported to the laboratory. Fu Qiao, Wenzhi Huang and Shan Gao analyzed and interpreted data.  
31  
32 301 Li Wei inoculated rectal swabs onto plates cultured for 18-24h. Fu Qiao, Zhiyong Zong and  
33  
34 302 Chuanmin Tao drafted the manuscript. All authors revised the manuscript for important intellectual  
35  
36 303 content. All authors read and approved the final manuscript.  
37  
38  
39

40 304

### 41 305 **Funding**

42  
43  
44 306 The work was supported by grants from the National Natural Science Foundation of China (project  
45  
46 307 no. 81772233, 81661130159 and 81861138055), West China Hospital of Sichuan University  
47  
48 308 (1.3.5 project for disciplines of excellence, project no. ZYYC08006) and the Newton Advanced  
49  
50 309 Fellowship, Royal Society, UK (NA150363).  
51  
52

53 310

1  
2  
3 311 **Competing interests**  
4

5 312 The authors declare that they have no competing interests.  
6  
7

8 313  
9

10 314 **Patient consent for publication**  
11

12 315 Not required.  
13  
14

15 316  
16

17 317 **Ethics approval**  
18

19 318 This project was approved by the Ethics Committee of West China Hospital of Sichuan University.  
20

21 319 We confirm that consents were not obtained from the patients. First, active screening is part of the  
22

23 320 routine care for ICU patients in our hospital. In other words, no matter whether we analyzed the  
24

25 321 data, the patients would receive the screening. Second, this is a retrospective study, in which we  
26

27 322 looked back the patients' data and did not perform any interventions. Third, before we performed  
28

29 323 this study, we have obtained ethical approval from the Ethical Committee and inform consents  
30

31 324 were waived due to the retrospective nature of this study.  
32  
33

34 325  
35  
36

37 326 **Availability of data and materials**  
38

39 327 The datasets during the current study available from the corresponding author on reasonable  
40

41 328 request.  
42  
43

44 329  
45  
46

47 330 **References**  
48

49 331 1 Wong D, Nielsen TB, Bonomo RA, *et al.* Clinical and Pathophysiological Overview of  
50 332 Acinetobacter Infections: a Century of Challenges. *Clin Microbiol Rev* 2017;**30**:409–47.  
51 333 doi:10.1128/CMR.00058-16  
52

53 334 2 Wang J, Liu F, Tartari E, *et al.* The Prevalence of Healthcare-Associated Infections in  
54 335 Mainland China: A Systematic Review and Meta-analysis. *Infect Control Hosp Epidemiol*  
55

- 1  
2  
3 336 2018;**39**:701–9. doi:10.1017/ice.2018.60
- 4 337 3 CDC. The biggest antibiotic-resistant threats in the U.S. Centers for Disease Control and  
5 338 Prevention. 2019.[https://www.cdc.gov/drugresistance/biggest\\_threats.html](https://www.cdc.gov/drugresistance/biggest_threats.html) (accessed 7 Aug 2019).
- 6 339 4 Global Priority List of Antibiotic-resistant Bacteria to Guide Research, Discovery, and  
7 340 Development of New Antibiotics. <http://apps.who.int/medicinedocs/en/m/abstract/Js23171en/>  
8 341 (accessed 7 Aug 2019).
- 9 342 5 European Centre for Disease Prevention and Control. Surveillance of antimicrobial resistance  
10 343 in Europe – Annual report of the European Antimicrobial Resistance Surveillance Network  
11 344 (EARS-Net) 2017. Stockholm: ECDC: 2018.
- 12 345 6 Asif M, Alvi IA, Rehman SU. Insight into *Acinetobacter baumannii*: pathogenesis, global  
13 346 resistance, mechanisms of resistance, treatment options, and alternative modalities. *Infect Drug*  
14 347 *Resist* 2018;**11**:1249–60. doi:10.2147/IDR.S166750
- 15 348 7 Guidelines for the prevention and control of carbapenem-resistant Enterobacteriaceae,  
16 349 *Acinetobacter baumannii* and *Pseudomonas aeruginosa* in health care facilities. WHO.  
17 350 2017.<http://www.who.int/infection-prevention/publications/guidelines-cre/en/> (accessed 7 Aug  
18 351 2019).
- 19 352 8 CHINET Data Cloud. <http://chinets.com/Chinet> (accessed 7 Aug 2019).
- 20 353 9 Lemos EV, de la Hoz FP, Alvis N, *et al.* Impact of carbapenem resistance on clinical and  
21 354 economic outcomes among patients with *Acinetobacter baumannii* infection in Colombia. *Clin*  
22 355 *Microbiol Infect* 2014;**20**:174–80. doi:10.1111/1469-0691.12251
- 23 356 10 Lemos EV, de la Hoz FP, Einarson TR, *et al.* Carbapenem resistance and mortality in patients  
24 357 with *Acinetobacter baumannii* infection: Systematic review and meta-analysis. *Clinical*  
25 358 *Microbiology and Infection* 2014;**20**:416–23. doi:10.1111/1469-0691.12363
- 26 359 11 Huang W, Qiao F, Wang Y, *et al.* Risk factors and prognosis of patients with bloodstream  
27 360 infection due to carbapenem-resistant *Acinetobacter baumannii*. *Chinese Journal of Infection*  
28 361 *Control* 2015;**14**:668–71.
- 29 362 12 Nutman A, Lerner A, Schwartz D, *et al.* Evaluation of carriage and environmental  
30 363 contamination by carbapenem-resistant *Acinetobacter baumannii*. *Clinical microbiology and*  
31 364 *infection : the official publication of the European Society of Clinical Microbiology and Infectious*  
32 365 *Diseases* 2016;**22**:949.e5-949.e7. doi:10.1016/j.cmi.2016.08.020
- 33 366 13 Cheng VCC, Chen JHK, So SYC, *et al.* Use of fluoroquinolones is the single most important  
34 367 risk factor for the high bacterial load in patients with nasal and gastrointestinal colonization by  
35 368 multidrug-resistant *Acinetobacter baumannii*. *European Journal of Clinical Microbiology &*  
36 369 *Infectious Diseases* 2015;**34**:2359–66. doi:10.1007/s10096-015-2489-4
- 37 370 14 An JH, Kim Y-H, Moon J-E, *et al.* Active surveillance for carbapenem-resistant *Acinetobacter*  
38 371 *baumannii* in a medical intensive care unit: Can it predict and reduce subsequent infections and  
39 372 the use of colistin? *Am J Infect Control* 2017;**45**:667–72. doi:10.1016/j.ajic.2017.01.016
- 40 373 15 Kiddee A, Assawatheptawee K, Na-udom A, *et al.* Risk Factors for Gastrointestinal  
41 374 Colonization and Acquisition of Carbapenem-Resistant Gram-Negative Bacteria among Patients  
42 375 in Intensive Care Units in Thailand. *Antimicrobial Agents and Chemotherapy* 2018;**62**.  
43 376 doi:10.1128/AAC.00341-18
- 44 377 16 Tischendorf J, de Avila RA, Safdar N. Risk of infection following colonization with  
45 378 carbapenem-resistant Enterobacteriaceae: A systematic review. *Am J Infect Control* 2016;**44**:539–  
46 379 43. doi:10.1016/j.ajic.2015.12.005
- 47 380 17 McConville TH, Sullivan SB, Gomez-Simmonds A, *et al.* Carbapenem-resistant  
48 381 Enterobacteriaceae colonization (CRE) and subsequent risk of infection and 90-day mortality in



- critically ill patients, an observational study. *PLoS ONE* 2017;**12**:e0186195. doi:10.1371/journal.pone.0186195
- 18 Liu JY, Wu YH, Cai M, *et al.* Point-prevalence survey of healthcare-associated infections in Beijing, China: a survey and analysis in 2014. *J Hosp Infect* 2016;**93**:271–9. doi:10.1016/j.jhin.2016.03.019
- 19 Song W, Lee J, Kim T-K, *et al.* Modified CHROMagar Acinetobacter medium for direct detection of multidrug-resistant Acinetobacter strains in nasal and rectal swab samples. *Ann Lab Med* 2013;**33**:193–5. doi:10.3343/alm.2013.33.3.193
- 20 Wei L, Qiao F, Lin J, *et al.* Modified CHROMagar Acinetobacter chromogenic culture combined with MALDI-TOF-MS for rapid screening of carbapenem-resistant Acinetobacter baumannii from human gut. *Chin J Nosocomiol* 2018;**28**:2893–7.
- 21 Hosmer DW, Lemeshow S. *Applied Logistic Regression, Second Edition*. 2nd edition. New York, NY: John Wiley & Sons 2000. <https://onlinelibrary.wiley.com/doi/book/10.1002/0471722146>
- 22 Esterly JS, Griffith M, Qi C, *et al.* Impact of carbapenem resistance and receipt of active antimicrobial therapy on clinical outcomes of Acinetobacter baumannii bloodstream infections. *Antimicrob Agents Chemother* 2011;**55**:4844–9. doi:10.1128/AAC.01728-10
- 23 Hosmer DW, Lemeshow S. Goodness of fit tests for the multiple logistic regression model. *Communications in Statistics - Theory and Methods* 1980;**9**:1043–69. doi:10.1080/03610928008827941
- 24 Scrucca L, Santucci A, Aversa F. Competing risk analysis using R: an easy guide for clinicians. *Bone Marrow Transplant*. 2007;**40**:381–387. doi:10.1038/sj.bmt.1705727.
- 25 Therneau TM, Grambsch PM. *Modeling Survival Data: Extending the Cox Model*. 2000 edition. Springer 2000.
- 26 Scrucca L, Santucci A, Aversa F. Regression modeling of competing risk using R: an in depth guide for clinicians. *Bone Marrow Transplant*. 2010;**45**:1388–1395. doi:10.1038/bmt.2009.359.
- 27 Mammina C, Bonura C, Vivoli AR, *et al.* Co-colonization with carbapenem-resistant *Klebsiella pneumoniae* and *Acinetobacter baumannii* in intensive care unit patients. *Scand J Infect Dis* 2013;**45**:629–34. doi:10.3109/00365548.2013.782614
- 28 Karaaslan A, Soysal A, Altinkanat Gelmez G, *et al.* Molecular characterization and risk factors for carbapenem-resistant Gram-negative bacilli colonization in children: emergence of NDM-producing *Acinetobacter baumannii* in a newborn intensive care unit in Turkey. *Journal of Hospital Infection* 2016;**92**:67–72. doi:10.1016/j.jhin.2015.09.011
- 29 DalBen MF, Basso M, Garcia CP, *et al.* Colonization pressure as a risk factor for colonization by multiresistant *Acinetobacter* spp and carbapenem-resistant *Pseudomonas aeruginosa* in an intensive care unit. *Clinics (Sao Paulo, Brazil)* 2013;**68**:1128–33. doi:10.6061/clinics/2013(08)11
- 30 Latibeaudiere R, Rosa R, Laowansiri P, *et al.* Surveillance cultures growing carbapenem-Resistant *Acinetobacter baumannii* predict the development of clinical infections: a retrospective cohort study. *Clin Infect Dis* 2015;**60**:415–22. doi:10.1093/cid/ciu847
- 31 Tseng W-P, Chen Y-C, Chen S-Y, *et al.* Risk for subsequent infection and mortality after hospitalization among patients with multidrug-resistant gram-negative bacteria colonization or infection. *Antimicrobial Resistance & Infection Control* 2018;**7**:93. doi:10.1186/s13756-018-0388-z
- 32 Blanco N, Harris AD, Rock C, *et al.* Risk Factors and Outcomes Associated with Multidrug-Resistant *Acinetobacter baumannii* upon Intensive Care Unit Admission. *Antimicrobial Agents*

1  
2  
3 427 *and Chemotherapy* 2017;**62**. doi:10.1128/AAC.01631-17  
4 428 33 Marchaim D, Navon-Venezia S, Schwartz D, *et al.* Surveillance cultures and duration of  
5 429 carriage of multidrug-resistant *Acinetobacter baumannii*. *J Clin Microbiol* 2007;**45**:1551–5.  
6 430 doi:10.1128/JCM.02424-06  
7

8  
9 431

10  
11 432  
12  
13  
14  
15  
16  
17  
18  
19  
20  
21  
22  
23  
24  
25  
26  
27  
28  
29  
30  
31  
32  
33  
34  
35  
36  
37  
38  
39  
40  
41  
42  
43  
44  
45  
46  
47  
48  
49  
50  
51  
52  
53  
54  
55  
56  
57  
58  
59  
60

For peer review only

1  
2  
3 **433 Figure legends**  
4

5  
6 **434 Figure 1.** Patient selection flow algorithm  
7

8 **435 Figure 2.** Survival curves of patients with and without CRAB intestinal carriage  
9  
10  
11  
12  
13  
14  
15  
16  
17  
18  
19  
20  
21  
22  
23  
24  
25  
26  
27  
28  
29  
30  
31  
32  
33  
34  
35  
36  
37  
38  
39  
40  
41  
42  
43  
44  
45  
46  
47  
48  
49  
50  
51  
52  
53  
54  
55  
56  
57  
58  
59  
60

For peer review only

Table 1 Risk factors for the acquisition of CRAB intestinal carriage during the ICU stay

| Characteristics             | Patients with acquiring CRAB intestinal carriage |              | Univariate analysis |              | Multivariate analysis |   |
|-----------------------------|--------------------------------------------------|--------------|---------------------|--------------|-----------------------|---|
|                             | Yes (n=115)                                      | No (n=780)   | OR (95% CI)         | P            | OR (95% CI)           | P |
| <b>Demographics</b>         |                                                  |              |                     |              |                       |   |
| Sex, male                   | 71 (61.74%)                                      | 502 (64.36%) | 1.12 (0.75–1.68)    | 0.59         |                       |   |
| Ethnicity, Han Chinese      | 108 (93.91%)                                     | 712 (91.28%) | 1.47 (0.66–3.29)    | 0.34         |                       |   |
| Age (median)                | 51 (40–70)                                       | 56 (45–68)   | /                   | 0.21         |                       |   |
| <b>Underlying disease</b>   |                                                  |              |                     |              |                       |   |
| Myocardial infarction       | 1 (0.87%)                                        | 4 (0.51%)    | 1.7 (0.19–15.36)    | 0.50         |                       |   |
| Peripheral vascular disease | 11 (9.57%)                                       | 62 (7.95%)   | 1.22 (0.62–2.40)    | 0.55         |                       |   |
| Cerebrovascular disease     | 4 (3.48%)                                        | 36 (4.62%)   | 0.74 (0.26–2.13)    | 0.58         |                       |   |
| Dementia                    | 1 (0.87%)                                        | 0 (0%)       | /                   | 0.13         |                       |   |
| Connective tissue disease   | 1 (0.87%)                                        | 12 (1.54%)   | 0.56 (0.07–4.36)    | 0.89         |                       |   |
| Peptic Ulcer                | 5 (4.35%)                                        | 25 (3.21%)   | 1.37 (0.51–3.66)    | 0.72         |                       |   |
| Hemiplegia                  | 0 (0%)                                           | 1 (0.13%)    | /                   | 1.00         |                       |   |
| Hypertension                | 36 (31.30%)                                      | 180 (23.08%) | 1.52 (0.99–2.33)    | 0.05         |                       |   |
| Tuberculosis                | 1 (0.87%)                                        | 12 (1.54%)   | 0.56 (0.07–4.36)    | 0.89         |                       |   |
| COPD                        | 10 (8.70%)                                       | 54 (6.92%)   | 1.28 (0.63–2.59)    | 0.49         |                       |   |
| Respiratory failure         | 40 (34.78%)                                      | 163 (20.90%) | 2.02 (1.33–3.07)    | <b>0.001</b> |                       |   |

|                              |                    |                     |                         |                  |                         |                  |
|------------------------------|--------------------|---------------------|-------------------------|------------------|-------------------------|------------------|
| Kidney failure               | 11 (9.57%)         | 31 (3.97%)          | 2.56 (1.25–5.24)        | <b>0.01</b>      |                         |                  |
| Heart failure                | 7 (6.09%)          | 19 (2.44%)          | 2.99 (1.28–7.01)        | 0.06             |                         |                  |
| Diabetes                     | 21 (18.26%)        | 102 (13.08%)        | 1.48 (0.89–2.49)        | 0.13             |                         |                  |
| Liver dysfunction            | 5 (4.35%)          | 37 (4.74%)          | 0.91 (0.35–2.37)        | 0.85             |                         |                  |
| <b>Hematological disease</b> | <b>71 (61.74%)</b> | <b>268 (34.36%)</b> | <b>3.08 (2.06–4.62)</b> | <b>&lt;0.001</b> | <b>2.26 (1.42–3.58)</b> | <b>0.001</b>     |
| <b>Pancreatitis</b>          | <b>35 (30.43%)</b> | <b>77 (9.87%)</b>   | <b>3.99 (2.52–6.34)</b> | <b>&lt;0.001</b> | <b>2.16 (1.28–3.67)</b> | <b>0.004</b>     |
| Medical operation            |                    |                     |                         |                  |                         |                  |
| <b>Surgery</b>               | <b>82 (71.30%)</b> | <b>645 (82.69%)</b> | <b>0.52 (0.33–0.81)</b> | <b>0.004</b>     | <b>0.40 (0.24–0.68)</b> | <b>0.001</b>     |
| CVC                          | 78 (67.83%)        | 424 (54.36%)        | 1.77 (1.17–2.68)        | <b>0.01</b>      |                         |                  |
| Ventilator                   | 101 (87.83%)       | 666 (85.38%)        | 1.23 (0.68–2.23)        | 0.49             |                         |                  |
| Indwelling catheter          | 110 (95.65%)       | 742 (95.13%)        | 1.13 (0.43–2.92)        | 0.81             |                         |                  |
| <b>Tube feeding</b>          | <b>84 (73.04%)</b> | <b>280 (35.90%)</b> | <b>4.84 (3.13–7.49)</b> | <b>&lt;0.001</b> | <b>3.35 (2.03–5.51)</b> | <b>&lt;0.001</b> |
| Nebulizer fiberoptic         | 73 (63.48%)        | 368 (47.18%)        | 1.95 (1.30–2.92)        | <b>0.001</b>     |                         |                  |
| Bronchoscope                 | 1 (0.87%)          | 21 (2.69%)          | 0.32 (0.04–2.38)        | 0.39             |                         |                  |
| Antimicrobial use            |                    |                     |                         |                  |                         |                  |
| <b>Cephalosporin</b>         | <b>35 (30.43%)</b> | <b>312 (40.00%)</b> | <b>0.66 (0.43–1.00)</b> | <b>0.05</b>      | <b>0.59 (0.37–0.95)</b> | <b>0.03</b>      |
| Vancomycin                   | 13 (11.30%)        | 32 (4.10%)          | 2.98 (1.51–5.86)        | <b>0.001</b>     |                         |                  |
| Aminoglycosides              | 12 (10.43%)        | 31 (3.97%)          | 2.81 (1.40–5.65)        | <b>0.002</b>     |                         |                  |
| <b>Carbapenems</b>           | <b>82 (71.30%)</b> | <b>295 (37.82%)</b> | <b>4.09 (2.66–6.27)</b> | <b>&lt;0.001</b> | <b>1.84 (1.11–3.07)</b> | <b>0.02</b>      |

1  
2  
3  
4  
5  
6  
7  
8  
9  
10  
11  
12  
13  
14  
15  
16  
17  
18  
19  
20  
21  
22  
23  
24  
25  
26  
27  
28  
29  
30  
31  
32  
33  
34  
35  
36  
37  
38  
39  
40  
41  
42  
43  
44  
45  
46  
47

|                                       |                     |                   |                  |                  |                         |             |
|---------------------------------------|---------------------|-------------------|------------------|------------------|-------------------------|-------------|
| Fluoroquinolones                      | 26 (22.61%)         | 137 (17.56%)      | 1.37 (0.85–2.20) | 0.19             |                         |             |
| Antifungal agents                     | 49 (42.61%)         | 138 (17.69%)      | 3.45 (2.29–5.22) | <b>&lt;0.001</b> |                         |             |
| Cephamycins                           | 16 (13.91%)         | 253 (32.44%)      | 0.34 (0.19–0.58) | <b>&lt;0.001</b> |                         |             |
| Lincomycin                            | 3 (2.61%)           | 61 (7.82%)        | 0.32 (0.10–1.02) | <b>0.04</b>      |                         |             |
| Tigecycline                           | 19 (16.52%)         | 69 (8.85%)        | 2.04 (1.18–3.54) | <b>0.01</b>      |                         |             |
| <b>APACHE II</b>                      | <b>21.5 (17–26)</b> | <b>17 (12–22)</b> | /                | <b>&lt;0.001</b> | <b>1.04 (1.01–1.07)</b> | <b>0.01</b> |
| Charlson score                        | 2 (1–5)             | 3 (2–4)           | /                | 0.06             |                         |             |
| Sharing room with other patients with | 20 (17.39%)         | 153 (19.62%)      | 0.86 (0.52–1.44) | 0.57             |                         |             |
| CRAB intestinal carriage              |                     |                   |                  |                  |                         |             |

COPD, chronic obstructive pulmonary disease. CVC, central venous catheter.

Variables with P < 0.05 in the multiple logistic analysis are highlighted in bold.

Table 2 Variables associated with developing subsequent CRAB infection during the ICU stay using sub-distribution hazard model

| Item                            | Subsequent CRAB infection during the ICU stay |                     | Univariate analysis    |        | Multivariate analysis   |                  |
|---------------------------------|-----------------------------------------------|---------------------|------------------------|--------|-------------------------|------------------|
|                                 | Yes (n=112)                                   | No (n=849)          | SDHR (95% CI)          | P      | SDHR (95% CI)           | P                |
| <b>CRAB intestinal carriage</b> | <b>51 (45.54%)</b>                            | <b>130 (15.31%)</b> | 2.82(1.94-4.09)        | <0.001 | <b>2.24 (1.48–3.39)</b> | <b>&lt;0.001</b> |
| Demographics                    |                                               |                     |                        |        |                         |                  |
| Sex, male                       | 72 (64.29%)                                   | 548 (64.55%)        | 1.03(0.70-1.52)        | 0.87   |                         |                  |
| Ethnicity, Han Chinese          | 106 (94.64%)                                  | 774 (91.38%)        | 1.62(0.70-3.74)        | 0.26   |                         |                  |
| Age (median)                    | 53 (42–67)                                    | 55 (44–68)          | 1.00(0.99-1.01)        | 0.71   |                         |                  |
| APACHE II                       | 21 (17–26)                                    | 17 (12–22)          | 1.05(1.03-1.07)        | <0.001 |                         |                  |
| Charlson score                  | 3 (1–5)                                       | 3 (1.5–4)           | 0.98(0.88-1.08)        | 0.66   |                         |                  |
| Underlying disease              |                                               |                     |                        |        |                         |                  |
| Peripheral vascular disease     | 13 (11.61%)                                   | 66 (7.77%)          | 1.30(0.72-2.34)        | 0.38   |                         |                  |
| Cerebrovascular disease         | 4 (3.57%)                                     | 36 (4.24%)          | 0.89(0.34-2.33)        | 0.81   |                         |                  |
| Connective tissue disease       | 1 (0.89%)                                     | 12 (1.41%)          | 0.60(0.08-4.48)        | 0.62   |                         |                  |
| Peptic ulcer                    | 4 (3.57%)                                     | 27 (3.18%)          | 1.11(0.46-2.71)        | 0.81   |                         |                  |
| Hypertension                    | 28 (25.00%)                                   | 199 (23.44%)        | 1.02(0.67-1.57)        | 0.92   |                         |                  |
| Tuberculosis                    | 2 (1.79%)                                     | 12 (1.41%)          | 1.22(0.28-5.27)        | 0.79   |                         |                  |
| COPD                            | 11 (9.82%)                                    | 55 (6.48%)          | 1.35(0.70-2.59)        | 0.37   |                         |                  |
| Respiratory failure             | 47 (41.96%)                                   | 170 (20.02%)        | 2.02(1.38-2.96)        | <0.001 |                         |                  |
| Kidney failure                  | 9 (8.04%)                                     | 42 (4.95%)          | 1.42(0.73-2.75)        | 0.30   |                         |                  |
| Heart failure                   | 4 (3.57%)                                     | 27 (3.18%)          | 1.22(0.48-3.11)        | 0.68   |                         |                  |
| Diabetes                        | 15 (13.39%)                                   | 118 (13.90%)        | 0.87(0.50-1.49)        | 0.61   |                         |                  |
| <b>Liver dysfunction</b>        | <b>17 (15.18%)</b>                            | <b>34 (4.00%)</b>   | <b>3.15(1.86-5.35)</b> | <0.001 | <b>2.33 (1.30–4.17)</b> | <b>0.005</b>     |
| Hematological disease           | 60 (53.57%)                                   | 314 (36.98%)        | 1.61(1.11-2.34)        | 0.012  |                         |                  |
| Pancreatitis                    | 29 (25.89%)                                   | 107 (12.60%)        | 1.94(1.29-2.92)        | 0.002  |                         |                  |
| Medical operation               |                                               |                     |                        |        |                         |                  |

1  
2  
3  
4  
5  
6  
7  
8  
9  
10  
11  
12  
13  
14  
15  
16  
17  
18  
19  
20  
21  
22  
23  
24  
25  
26  
27  
28  
29  
30  
31  
32  
33  
34  
35  
36  
37  
38  
39  
40  
41  
42  
43  
44  
45  
46  
47

|                      |                     |                     |                        |        |                         |                  |
|----------------------|---------------------|---------------------|------------------------|--------|-------------------------|------------------|
| Surgery              | 83 (74.11%)         | 711 (83.75%)        | 0.70(0.45-1.07)        | 0.099  |                         |                  |
| CVC                  | 83 (74.11%)         | 470 (55.36%)        | 1.85(1.21-2.81)        | 0.004  |                         |                  |
| <b>Ventilator</b>    | <b>103 (91.96%)</b> | <b>719 (84.69%)</b> | <b>2.02(1.04-3.93)</b> | 0.038  |                         |                  |
| Indwelling catheter  | 109 (97.32%)        | 808 (95.17%)        | 1.84(0.62-5.52)        | 0.27   |                         |                  |
| Tube feeding         | 80 (71.43%)         | 332 (39.10%)        | 2.44(1.62-3.69)        | <0.001 |                         |                  |
| Nebulizer fiberoptic | 72 (64.29%)         | 413 (48.65%)        | 1.18(0.80-1.73)        | 0.40   |                         |                  |
| Bronchoscope         | 5 (4.46%)           | 18 (2.12%)          | 1.44(0.59-3.52)        | 0.43   |                         |                  |
| Antimicrobial use    |                     |                     |                        |        |                         |                  |
| <b>Cephalosporin</b> | <b>20 (17.86%)</b>  | <b>236 (27.80%)</b> | <b>0.50(0.31-0.81)</b> | 0.005  | <b>0.45 (0.28–0.73)</b> | <b>0.001</b>     |
| Vancomycin           | 3 (2.68%)           | 35 (4.12%)          | 0.68(0.21-2.15)        | 0.51   |                         |                  |
| Aminoglycosides      | 1 (0.89%)           | 23 (2.71%)          | 0.24(0.03-1.71)        | 0.15   |                         |                  |
| <b>Carbapenems</b>   | <b>82 (73.21%)</b>  | <b>351 (41.34%)</b> | <b>2.84(1.87-4.32)</b> | <0.001 | <b>2.21(1.40–3.49)</b>  | <b>&lt;0.001</b> |
| Fluoroquinolones     | 32 (28.57%)         | 154 (18.14%)        | 1.04(0.69-1.56)        | 0.84   |                         |                  |
| Antifungal agents    | 23 (20.54%)         | 157 (18.49%)        | 0.96(0.61-1.5)         | 0.85   |                         |                  |
| <b>Cephamycins</b>   | <b>16 (14.29%)</b>  | <b>196 (23.09%)</b> | <b>0.51(0.30-0.86)</b> | 0.011  | <b>0.53 (0.31–0.90)</b> | <b>0.018</b>     |
| Lincomycin           | 5 (4.46%)           | 35 (4.12%)          | 1.01(0.41-2.48)        | 0.99   |                         |                  |
| Tigecycline          | 13 (11.61%)         | 65 (7.66%)          | 1.33(0.76-2.34)        | 0.32   |                         |                  |

COPD, chronic obstructive pulmonary disease. CVC, central venous catheter.

Variables with P < 0.05 in the multivariate COX analysis are highlighted in bold.





Figure 1. Patient selection flow algorithm



**Figure 2.** Survival curves of patients with and without CRAB intestinal carriage

(cumulative probability of CRAB infection). Death in the ICU is considered as a competing event, not drawn in the figure. The solid line represents patients with CRAB intestinal carriage, while the dashed line represents those without. In patients with CRAB intestinal carriage, Day 0 corresponds to the day of the first positive rectal sample. While in patients without CRAB intestinal carriage, Day 0 corresponds to the day of the first rectal sample.

## Supplementary files

Table S1 Variables associated with developing subsequent CRAB infection during the ICU stay using sub-distribution hazard model (exposed group was those patients with intestinal carriage on ICU admission)

| Item                            | Subsequent CRAB infection during the ICU stay |                   | Univariate analysis    |                  | Multivariate analysis   |                  |
|---------------------------------|-----------------------------------------------|-------------------|------------------------|------------------|-------------------------|------------------|
|                                 | Yes (n=80)                                    | No (n=766)        | <i>SDHR (95% CI)</i>   | <i>P</i>         | <i>SDHR (95% CI)</i>    | <i>P</i>         |
| <b>CRAB intestinal carriage</b> | <b>19 (23.75%)</b>                            | <b>47 (6.14%)</b> | 3.78(2.20-6.49)        | <b>&lt;0.001</b> | <b>3.42 (1.88-6.22)</b> | <b>&lt;0.001</b> |
| Demographics                    |                                               |                   |                        |                  |                         |                  |
| Sex, male                       | 50 (62.50%)                                   | 499 (65.14%)      | 1.15(0.73-1.80)        | 0.55             |                         |                  |
| Ethnicity, Han Chinese          | 77 (96.25%)                                   | 697 (90.99%)      | 2.54(0.78-8.24)        | 0.12             |                         |                  |
| Age (median)                    | 54 (42-68)                                    | 55 (44-68)        | 1.00(0.99-1.02)        | 0.85             |                         |                  |
| <b>APACHE II</b>                | <b>20 (15-26)</b>                             | <b>17 (12-22)</b> | <b>1.06(1.03-1.08)</b> | <b>&lt;0.001</b> | <b>1.03 (1.00-1.05)</b> | <b>0.045</b>     |
| Charlson score                  | 3 (1-5)                                       | 3 (2-4)           | 1.00(0.88-1.13)        | 1.00             |                         |                  |
| Underlying disease              |                                               |                   |                        |                  |                         |                  |
| Peripheral vascular disease     | 11 (13.75%)                                   | 57 (7.44%)        | 1.62(0.85-3.10)        | 0.14             |                         |                  |
| Cerebrovascular disease         | 3 (3.75%)                                     | 33 (4.31%)        | 0.87(0.29-2.66)        | 0.81             |                         |                  |
| Connective tissue disease       | 1 (1.25%)                                     | 11 (1.44%)        | 0.78(0.11-5.73)        | 0.80             |                         |                  |
| Peptic ulcer                    | 3 (3.75%)                                     | 23 (3.00%)        | 1.19(0.41-3.46)        | 0.74             |                         |                  |
| Hypertension                    | 18 (22.50%)                                   | 173 (22.58%)      | 0.97(0.58-1.64)        | 0.91             |                         |                  |
| Tuberculosis                    | 1 (1.25%)                                     | 12 (1.57%)        | 0.72(0.10-5.37)        | 0.75             |                         |                  |
| <b>COPD</b>                     | <b>11 (13.75%)</b>                            | <b>45 (5.87%)</b> | <b>2.21(1.15-4.24)</b> | <b>0.017</b>     | <b>2.71 (1.40-5.24)</b> | <b>0.003</b>     |
| Respiratory failure             | 34 (42.50%)                                   | 143 (18.67%)      | 2.38(1.52-3.72)        | <b>&lt;0.001</b> |                         |                  |
| Kidney failure                  | 5 (6.25%)                                     | 35 (4.57%)        | 1.13(0.474-2.7)        | 0.78             |                         |                  |
| Heart failure                   | 2 (2.50%)                                     | 21 (2.74%)        | 1.05(0.28-3.92)        | 0.95             |                         |                  |

|    |                       |                    |                     |                        |                  |                         |                  |
|----|-----------------------|--------------------|---------------------|------------------------|------------------|-------------------------|------------------|
| 1  |                       |                    |                     |                        |                  |                         |                  |
| 2  |                       |                    |                     |                        |                  |                         |                  |
| 3  |                       |                    |                     |                        |                  |                         |                  |
| 4  |                       |                    |                     |                        |                  |                         |                  |
| 5  | Diabetes              | 11 (13.75%)        | 101 (13.19%)        | 1.03(0.54-1.98)        | 0.92             |                         |                  |
| 6  | Liver dysfunction     | <b>14 (17.50%)</b> | <b>32 (4.18%)</b>   | <b>3.59(2.00-6.45)</b> | <b>&lt;0.001</b> | <b>2.35 (1.30-4.25)</b> | <b>0.005</b>     |
| 7  | Hematological disease | 42 (52.50%)        | 261 (34.07%)        | 1.84(1.19-2.85)        | <b>0.006</b>     |                         |                  |
| 8  | Pancreatitis          | 17 (21.25%)        | 84 (10.97%)         | 1.91(1.13-3.22)        | <b>0.016</b>     |                         |                  |
| 9  |                       |                    |                     |                        |                  |                         |                  |
| 10 | Medical operation     |                    |                     |                        |                  |                         |                  |
| 11 | Surgery               | 62 (77.50%)        | 638 (83.29%)        | 0.83(0.49-1.42)        | 0.50             |                         |                  |
| 12 | CVC                   | 61 (76.25%)        | 414 (54.05%)        | 2.23(1.33-3.74)        | <b>0.002</b>     |                         |                  |
| 13 | Ventilator            | 72 (90.00%)        | 648 (84.60%)        | 1.62(0.80-3.25)        | 0.18             |                         |                  |
| 14 | Indwelling catheter   | 78 (97.50%)        | 729 (95.17%)        | 1.91(0.53-6.94)        | 0.32             |                         |                  |
| 15 | Tube feeding          | 54 (67.50%)        | 265 (34.60%)        | 2.71(1.69-4.34)        | <b>&lt;0.001</b> |                         |                  |
| 16 | Nebulizer fiberoptic  | 51 (63.75%)        | 349 (45.56%)        | 1.35(0.86-2.12)        | 0.19             |                         |                  |
| 17 | Bronchoscope          | 5 (6.25%)          | 17 (2.22%)          | 1.85(0.77-4.46)        | 0.17             |                         |                  |
| 18 |                       |                    |                     |                        |                  |                         |                  |
| 19 | Antimicrobial use     |                    |                     |                        |                  |                         |                  |
| 20 | Cephalosporin         | <b>15 (18.75%)</b> | <b>210 (27.42%)</b> | <b>0.54(0.31-0.95)</b> | <b>0.032</b>     | <b>0.43(0.24-0.78)</b>  | <b>0.006</b>     |
| 21 | Vancomycin            | 2 (2.50%)          | 28 (3.66%)          | 0.70(0.16-2.98)        | 0.63             |                         |                  |
| 22 | Aminoglycosides       | 1 (1.25%)          | 15 (1.96%)          | 0.50(0.07-3.52)        | 0.48             |                         |                  |
| 23 | Carbapenems           | <b>58 (72.50%)</b> | <b>284 (37.08%)</b> | <b>3.57(2.18-5.85)</b> | <b>&lt;0.001</b> | <b>2.61(1.53-4.46)</b>  | <b>&lt;0.001</b> |
| 24 | Fluoroquinolones      | 21 (26.25%)        | 127 (16.58%)        | 1.07(0.66-1.74)        | 0.79             |                         |                  |
| 25 | Antifungal agents     | 17 (21.25%)        | 123 (16.06%)        | 1.26(0.74-2.12)        | 0.39             |                         |                  |
| 26 | Cephamecins           | 12 (15.00%)        | 179 (23.37%)        | 0.52(0.28-0.96)        | <b>0.036</b>     |                         |                  |
| 27 | Lincomycin            | 3 (3.75%)          | 32 (4.18%)          | 0.84(0.26-2.68)        | 0.76             |                         |                  |
| 28 | Tigecycline           | 8 (10.00%)         | 53 (6.92%)          | 1.36(0.67-2.76)        | 0.39             |                         |                  |

COPD, chronic obstructive pulmonary disease. CVC, central venous catheter.

Variables with P < 0.05 in the multivariate COX analysis are highlighted in bold.

Table S2. Variables associated with developing subsequent CRAB infection during the ICU stay using sub-distribution hazard model (exposed group was those patients with ICU acquisition of CRAB intestinal carriage)

| Item                        | Subsequent CRAB infection during the ICU stay |                     | Univariate analysis    |                  | Multivariate analysis   |              |
|-----------------------------|-----------------------------------------------|---------------------|------------------------|------------------|-------------------------|--------------|
|                             | Yes (n=93)                                    | No (n=802)          | <i>SDHR (95% CI)</i>   | <i>P</i>         | <i>SDHR (95% CI)</i>    | <i>P</i>     |
| CRAB intestinal carriage    | <b>32 (34.41%)</b>                            | <b>83 (10.35%)</b>  | <b>2.35(1.56-3.55)</b> | <b>&lt;0.001</b> | <b>1.81 (1.15-2.86)</b> | <b>0.011</b> |
| Demographics                |                                               |                     |                        |                  |                         |              |
| Sex, male                   | 60 (64.52%)                                   | 513 (63.97%)        | 1.01(0.66-1.55)        | 0.95             |                         |              |
| Ethnicity, Han Chinese      | 87 (93.55%)                                   | 731 (91.15%)        | 1.32(0.56-3.08)        | 0.52             |                         |              |
| Age (median)                | 54 (44-68)                                    | 55 (45-68)          | 1.00(0.99-1.01)        | 0.70             |                         |              |
| APACHE II                   | 21 (18-26)                                    | 17 (12-22)          | 1.05(1.03-1.07)        | <0.001           |                         |              |
| Charlson score              | 3 (1-5)                                       | 3 (2-4)             | 1.01(0.91-1.13)        | 0.80             |                         |              |
| Underlying disease          |                                               |                     |                        |                  |                         |              |
| Peripheral vascular disease | 11 (11.83%)                                   | 62 (7.73%)          | 1.34(0.71-2.53)        | 0.37             |                         |              |
| Cerebrovascular disease     | 4 (4.30%)                                     | 36 (4.49%)          | 1.03(0.39-2.73)        | 0.96             |                         |              |
| Connective tissue disease   | 1 (1.08%)                                     | 12 (1.50%)          | 0.68(0.09-5.07)        | 0.70             |                         |              |
| Peptic ulcer                | 4 (4.30%)                                     | 26 (3.24%)          | 1.39(0.58-3.33)        | 0.46             |                         |              |
| Hypertension                | 25 (26.88%)                                   | 191 (23.82%)        | 1.10(0.69-1.74)        | 0.70             |                         |              |
| Tuberculosis                | 2 (2.15%)                                     | 11 (1.37%)          | 1.41(0.32-6.29)        | 0.65             |                         |              |
| COPD                        | 10 (10.75%)                                   | 54 (6.73%)          | 1.37(0.69-2.75)        | 0.37             |                         |              |
| Respiratory failure         | <b>44 (47.31%)</b>                            | <b>159 (19.83%)</b> | <b>2.42(1.59-3.69)</b> | <b>&lt;0.001</b> | <b>1.84 (1.17-2.90)</b> | <b>0.009</b> |
| Kidney failure              | 7 (7.53%)                                     | 35 (4.36%)          | 1.56(0.75-3.28)        | 0.24             |                         |              |

|    |                       |                    |                     |                        |                  |                         |              |
|----|-----------------------|--------------------|---------------------|------------------------|------------------|-------------------------|--------------|
| 1  |                       |                    |                     |                        |                  |                         |              |
| 2  |                       |                    |                     |                        |                  |                         |              |
| 3  |                       |                    |                     |                        |                  |                         |              |
| 4  |                       |                    |                     |                        |                  |                         |              |
| 5  | Heart failure         | 3 (3.23%)          | 24 (2.99%)          | 1.34(0.47-3.82)        | 0.58             |                         |              |
| 6  | Diabetes              | 11 (11.83%)        | 112 (13.97%)        | 0.75(0.40-1.39)        | 0.36             |                         |              |
| 7  | Liver dysfunction     | <b>13 (13.98%)</b> | <b>29 (3.62%)</b>   | <b>3.18(1.74-5.81)</b> | <b>&lt;0.001</b> | <b>2.13(1.05-4.32)</b>  | <b>0.037</b> |
| 8  | Hematological disease | 49 (52.69%)        | 290 (36.16%)        | 1.60(1.06-2.40)        | 0.025            |                         |              |
| 9  | Pancreatitis          | 20 (21.51%)        | 92 (11.47%)         | 1.71(1.06-2.76)        | 0.028            |                         |              |
| 10 |                       |                    |                     |                        |                  |                         |              |
| 11 |                       |                    |                     |                        |                  |                         |              |
| 12 | Medical operation     |                    |                     |                        |                  |                         |              |
| 13 | Surgery               | 70 (75.27%)        | 666 (83.04%)        | 0.78(0.49-1.27)        | 0.32             |                         |              |
| 14 | CVC                   | 68 (73.12%)        | 434 (54.11%)        | 1.82(1.15-2.88)        | 0.011            |                         |              |
| 15 | Ventilator            | 85 (91.40%)        | 683 (85.16%)        | 1.83(0.89-3.76)        | 0.10             |                         |              |
| 16 | Indwelling catheter   | 91 (97.85%)        | 761 (94.89%)        | 2.37(0.58-9.63)        | 0.23             |                         |              |
| 17 | Tube feeding          | 67 (72.04%)        | 300 (37.41%)        | 2.64(1.67-4.18)        | <0.001           |                         |              |
| 18 | Nebulizer fiberoptic  | 64 (68.82%)        | 388 (48.38%)        | 1.42(0.92-2.20)        | 0.11             |                         |              |
| 19 | Bronchoscope          | 5 (5.38%)          | 18 (2.24%)          | 1.60(0.64-3.99)        | 0.31             |                         |              |
| 20 |                       |                    |                     |                        |                  |                         |              |
| 21 |                       |                    |                     |                        |                  |                         |              |
| 22 | Antimicrobial use     |                    |                     |                        |                  |                         |              |
| 23 |                       |                    |                     |                        |                  |                         |              |
| 24 | Cephalosporin         | <b>18 (19.35%)</b> | <b>213 (26.56%)</b> | <b>0.60(0.36-1.00)</b> | <b>0.051</b>     | <b>0.59(0.35-1.00)</b>  | <b>0.048</b> |
| 25 | Vancomycin            | 2 (2.15%)          | 33 (4.11%)          | 0.53(0.13-2.15)        | 0.38             |                         |              |
| 26 | Carbapenems           | <b>68 (73.12%)</b> | <b>319 (39.78%)</b> | <b>2.92(1.84-4.64)</b> | <b>&lt;0.001</b> | <b>2.11 (1.27-3.50)</b> | <b>0.004</b> |
| 27 | Fluoroquinolones      | 28 (30.11%)        | 144 (17.96%)        | 1.11(0.71-1.72)        | 0.65             |                         |              |
| 28 | Antifungal agents     | 16 (17.20%)        | 141 (17.58%)        | 0.82(0.48-1.39)        | 0.46             |                         |              |
| 29 | Cephamycins           | 15 (16.13%)        | 187 (23.32%)        | 0.56(0.33-0.98)        | 0.042            |                         |              |
| 30 | Lincomycin            | 4 (4.30%)          | 34 (4.24%)          | 0.90(0.34-2.44)        | 0.84             |                         |              |
| 31 | Tigecycline           | 7 (7.53%)          | 57 (7.11%)          | 0.91(0.43-1.96)        | 0.82             |                         |              |
| 32 |                       |                    |                     |                        |                  |                         |              |
| 33 |                       |                    |                     |                        |                  |                         |              |
| 34 |                       |                    |                     |                        |                  |                         |              |

COPD, chronic obstructive pulmonary disease. CVC, central venous catheter.

Variables with P < 0.05 in the multivariate COX analysis are highlighted in bold.

# Reporting checklist for cohort study.

Based on the STROBE cohort guidelines.

## Instructions to authors

Complete this checklist by entering the page numbers from your manuscript where readers will find each of the items listed below.

Your article may not currently address all the items on the checklist. Please modify your text to include the missing information. If you are certain that an item does not apply, please write "n/a" and provide a short explanation.

Upload your completed checklist as an extra file when you submit to a journal.

In your methods section, say that you used the STROBE cohort reporting guidelines, and cite them as:

von Elm E, Altman DG, Egger M, Pocock SJ, Gøtzsche PC, Vandenbroucke JP. The Strengthening of Reporting of Observational Studies in Epidemiology (STROBE) Statement: guidelines for reporting observational studies.

|                           | Reporting Item                                                                                            | Page Number |
|---------------------------|-----------------------------------------------------------------------------------------------------------|-------------|
| <b>Title and abstract</b> |                                                                                                           |             |
| Title                     | <a href="#">#1a</a> Indicate the study's design with a commonly used term in the title or the abstract    | 2           |
| Abstract                  | <a href="#">#1b</a> Provide in the abstract an informative and balanced summary of what was done and what | 2           |

was found

## Introduction

Background / [#2](#) Explain the scientific background and rationale for 4-5  
 rationale the investigation being reported

Objectives [#3](#) State specific objectives, including any 5  
 prespecified hypotheses

## Methods

Study design [#4](#) Present key elements of study design early in the 7-8  
 paper

Setting [#5](#) Describe the setting, locations, and relevant dates, 5-6  
 including periods of recruitment, exposure, follow-up, and data collection

Eligibility criteria [#6a](#) Give the eligibility criteria, and the sources and 6  
 methods of selection of participants. Describe methods of follow-up.

Eligibility criteria [#6b](#) For matched studies, give matching criteria and n/a  
 number of exposed and unexposed  
 Not matched studies

Variables [#7](#) Clearly define all outcomes, exposures, predictors, 6-8  
 potential confounders, and effect modifiers. Give diagnostic criteria, if applicable

Data sources / [#8](#) For each variable of interest give sources of data 6-8  
 measurement and details of methods of assessment



(measurement). Describe comparability of assessment methods if there is more than one group. Give information separately for exposed and unexposed groups if applicable.

|                        |                      |                                                                                                                               |                                                                     |
|------------------------|----------------------|-------------------------------------------------------------------------------------------------------------------------------|---------------------------------------------------------------------|
| Bias                   | <a href="#">#9</a>   | Describe any efforts to address potential sources of bias                                                                     | 8                                                                   |
| Study size             | <a href="#">#10</a>  | Explain how the study size was arrived at                                                                                     | n/a                                                                 |
|                        |                      |                                                                                                                               | Including all the patients admitted to the ICU in the study period. |
| Quantitative variables | <a href="#">#11</a>  | Explain how quantitative variables were handled in the analyses. If applicable, describe which groupings were chosen, and why | 7                                                                   |
| Statistical methods    | <a href="#">#12a</a> | Describe all statistical methods, including those used to control for confounding                                             | 7-8                                                                 |
| Statistical methods    | <a href="#">#12b</a> | Describe any methods used to examine subgroups and interactions                                                               | 8                                                                   |
| Statistical methods    | <a href="#">#12c</a> | Explain how missing data were addressed                                                                                       | n/a                                                                 |
|                        |                      |                                                                                                                               | No missing data.                                                    |
| Statistical methods    | <a href="#">#12d</a> | If applicable, explain how loss to follow-up was addressed                                                                    | n/a                                                                 |
|                        |                      |                                                                                                                               | Not applicable                                                      |

|    |                  |                      |                                                      |                  |
|----|------------------|----------------------|------------------------------------------------------|------------------|
| 1  | Statistical      | <a href="#">#12e</a> | Describe any sensitivity analyses                    | n/a              |
| 2  |                  |                      |                                                      |                  |
| 3  | methods          |                      |                                                      | Not done.        |
| 4  |                  |                      |                                                      |                  |
| 5  |                  |                      |                                                      |                  |
| 6  |                  |                      |                                                      |                  |
| 7  | <b>Results</b>   |                      |                                                      |                  |
| 8  |                  |                      |                                                      |                  |
| 9  |                  |                      |                                                      |                  |
| 10 | Participants     | <a href="#">#13a</a> | Report numbers of individuals at each stage of       | 9                |
| 11 |                  |                      | study—eg numbers potentially eligible, examined      |                  |
| 12 |                  |                      | for eligibility, confirmed eligible, included in the |                  |
| 13 |                  |                      | study, completing follow-up, and analysed. Give      |                  |
| 14 |                  |                      | information separately for for exposed and           |                  |
| 15 |                  |                      | unexposed groups if applicable.                      |                  |
| 16 |                  |                      |                                                      |                  |
| 17 |                  |                      |                                                      |                  |
| 18 |                  |                      |                                                      |                  |
| 19 |                  |                      |                                                      |                  |
| 20 |                  |                      |                                                      |                  |
| 21 |                  |                      |                                                      |                  |
| 22 |                  |                      |                                                      |                  |
| 23 |                  |                      |                                                      |                  |
| 24 |                  |                      |                                                      |                  |
| 25 | Participants     | <a href="#">#13b</a> | Give reasons for non-participation at each stage     | 9                |
| 26 |                  |                      |                                                      |                  |
| 27 |                  |                      |                                                      |                  |
| 28 | Participants     | <a href="#">#13c</a> | Consider use of a flow diagram                       | Figure 1         |
| 29 |                  |                      |                                                      |                  |
| 30 |                  |                      |                                                      |                  |
| 31 | Descriptive data | <a href="#">#14a</a> | Give characteristics of study participants (eg       | 19-23            |
| 32 |                  |                      | demographic, clinical, social) and information on    |                  |
| 33 |                  |                      | exposures and potential confounders. Give            |                  |
| 34 |                  |                      | information separately for exposed and unexposed     |                  |
| 35 |                  |                      | groups if applicable.                                |                  |
| 36 |                  |                      |                                                      |                  |
| 37 |                  |                      |                                                      |                  |
| 38 |                  |                      |                                                      |                  |
| 39 |                  |                      |                                                      |                  |
| 40 |                  |                      |                                                      |                  |
| 41 |                  |                      |                                                      |                  |
| 42 |                  |                      |                                                      |                  |
| 43 | Descriptive data | <a href="#">#14b</a> | Indicate number of participants with missing data    | n/a              |
| 44 |                  |                      | for each variable of interest                        |                  |
| 45 |                  |                      |                                                      | No missing data. |
| 46 |                  |                      |                                                      |                  |
| 47 |                  |                      |                                                      |                  |
| 48 |                  |                      |                                                      |                  |
| 49 | Descriptive data | <a href="#">#14c</a> | Summarise follow-up time (eg, average and total      | Figure 2         |
| 50 |                  |                      | amount)                                              |                  |
| 51 |                  |                      |                                                      |                  |
| 52 |                  |                      |                                                      |                  |
| 53 |                  |                      |                                                      |                  |
| 54 |                  |                      |                                                      |                  |
| 55 | Outcome data     | <a href="#">#15</a>  | Report numbers of outcome events or summary          | 19-23            |
| 56 |                  |                      | measures over time. Give information separately      |                  |
| 57 |                  |                      |                                                      |                  |
| 58 |                  |                      |                                                      |                  |
| 59 |                  |                      |                                                      |                  |
| 60 |                  |                      |                                                      |                  |

|    |                   |                                                                           |                       |
|----|-------------------|---------------------------------------------------------------------------|-----------------------|
| 1  |                   | for exposed and unexposed groups if applicable.                           |                       |
| 2  |                   |                                                                           |                       |
| 3  |                   |                                                                           |                       |
| 4  | Main results      | <a href="#">#16a</a> Give unadjusted estimates and, if applicable,        | 19-23                 |
| 5  |                   |                                                                           |                       |
| 6  |                   | confounder-adjusted estimates and their precision                         |                       |
| 7  |                   |                                                                           |                       |
| 8  |                   | (eg, 95% confidence interval). Make clear which                           |                       |
| 9  |                   |                                                                           |                       |
| 10 |                   | confounders were adjusted for and why they were                           |                       |
| 11 |                   |                                                                           |                       |
| 12 |                   | included                                                                  |                       |
| 13 |                   |                                                                           |                       |
| 14 |                   |                                                                           |                       |
| 15 |                   |                                                                           |                       |
| 16 | Main results      | <a href="#">#16b</a> Report category boundaries when continuous           | n/a                   |
| 17 |                   |                                                                           |                       |
| 18 |                   | variables were categorized                                                |                       |
| 19 |                   |                                                                           | Continuous variables  |
| 20 |                   |                                                                           |                       |
| 21 |                   |                                                                           | were not categorized. |
| 22 |                   |                                                                           |                       |
| 23 |                   |                                                                           |                       |
| 24 | Main results      | <a href="#">#16c</a> If relevant, consider translating estimates of       | n/a                   |
| 25 |                   |                                                                           |                       |
| 26 |                   | relative risk into absolute risk for a meaningful time                    |                       |
| 27 |                   |                                                                           | Not applicable        |
| 28 |                   | period                                                                    |                       |
| 29 |                   |                                                                           |                       |
| 30 |                   |                                                                           |                       |
| 31 |                   |                                                                           |                       |
| 32 | Other analyses    | <a href="#">#17</a> Report other analyses done—e.g., analyses of          | Supplementary files   |
| 33 |                   |                                                                           |                       |
| 34 |                   | subgroups and interactions, and sensitivity                               |                       |
| 35 |                   |                                                                           |                       |
| 36 |                   | analyses                                                                  |                       |
| 37 |                   |                                                                           |                       |
| 38 |                   |                                                                           |                       |
| 39 | <b>Discussion</b> |                                                                           |                       |
| 40 |                   |                                                                           |                       |
| 41 |                   |                                                                           |                       |
| 42 | Key results       | <a href="#">#18</a> Summarise key results with reference to study         | 11-13                 |
| 43 |                   |                                                                           |                       |
| 44 |                   | objectives                                                                |                       |
| 45 |                   |                                                                           |                       |
| 46 |                   |                                                                           |                       |
| 47 |                   |                                                                           |                       |
| 48 | Limitations       | <a href="#">#19</a> Discuss limitations of the study, taking into account | 13                    |
| 49 |                   |                                                                           |                       |
| 50 |                   | sources of potential bias or imprecision. Discuss                         |                       |
| 51 |                   |                                                                           |                       |
| 52 |                   | both direction and magnitude of any potential bias.                       |                       |
| 53 |                   |                                                                           |                       |
| 54 |                   |                                                                           |                       |
| 55 | Interpretation    | <a href="#">#20</a> Give a cautious overall interpretation considering    | 11-13                 |
| 56 |                   |                                                                           |                       |
| 57 |                   | objectives, limitations, multiplicity of analyses,                        |                       |
| 58 |                   |                                                                           |                       |
| 59 |                   |                                                                           |                       |
| 60 |                   |                                                                           |                       |

1 results from similar studies, and other relevant  
2  
3 evidence.  
4

5  
6 Generalisability [#21](#) Discuss the generalisability (external validity) of 13  
7  
8 the study results  
9

## 10 11 Other

### 12 13 Information

14  
15  
16 Funding [#22](#) Give the source of funding and the role of the 14  
17  
18 funders for the present study and, if applicable, for  
19 the original study on which the present article is  
20  
21 based  
22  
23  
24  
25

26 None The STROBE checklist is distributed under the terms of the Creative Commons Attribution  
27 License CC-BY. This checklist can be completed online using <https://www.goodreports.org/>, a tool  
28  
29 made by the [EQUATOR Network](#) in collaboration with [Penelope.ai](#)  
30  
31  
32  
33  
34  
35  
36  
37  
38  
39  
40  
41  
42  
43  
44  
45  
46  
47  
48  
49  
50  
51  
52  
53  
54  
55  
56  
57  
58  
59  
60
